# Supplementary material for: Regulation of lipids is central to replicative senescence
Source: Royal Society of Chemistry journal article supplement (doi:10.1039/c6mb00842a), 2017-01-19
Supplement: c6mb00842a1.zip [file c6mb00842a1.zip]

## Sheet: Supplemental Table 1_updated
GeneID	Gene_name	Protein_name	log2FoldChange	pvalue	padj	Gene_type
ENSG00000000003.10	TSPAN6	tetraspanin 6	-0.77471	1.49e-08	1.3e-07	protein_coding
ENSG00000000005.5	TNMD	tenomodulin	NA	NA	NA	protein_coding
ENSG00000000419.8	DPM1	dolichyl-phosphate mannosyltransferase subunit 1, catalytic	0.0126697	0.914012	0.958102	protein_coding
ENSG00000000457.8	SCYL3	SCY1 like pseudokinase 3	0.203411	0.115077	0.235789	protein_coding
ENSG00000000460.12	C1orf112	chromosome 1 open reading frame 112	0.291287	0.0642702	0.148096	protein_coding
ENSG00000000938.8	FGR	FGR proto-oncogene, Src family tyrosine kinase	-0.14196	0.604439	0.76434	protein_coding
ENSG00000000971.11	CFH	complement factor H	-0.652407	6.07e-18	1.1e-16	protein_coding
ENSG00000001036.8	FUCA2	fucosidase, alpha-L- 2, plasma	0.236512	0.000726931	0.00303129	protein_coding
ENSG00000001084.6	GCLC	glutamate-cysteine ligase catalytic subunit	-0.388411	3.4e-06	2.17e-05	protein_coding
ENSG00000001167.10	NFYA	nuclear transcription factor Y subunit alpha	-0.197168	0.0170309	0.0490922	protein_coding
ENSG00000001460.13	STPG1	sperm tail PG-rich repeat containing 1	-0.220637	0.0488816	0.118316	protein_coding
ENSG00000001461.12	NIPAL3	NIPA like domain containing 3	-1.13965	1.21e-48	8.18e-47	protein_coding
ENSG00000001497.12	LAS1L	LAS1 like, ribosome biogenesis factor	-0.201361	0.029785	0.0787405	protein_coding
ENSG00000001561.6	ENPP4	ectonucleotide pyrophosphatase/phosphodiesterase 4 (putative)	-0.0411124	0.821394	0.907644	protein_coding
ENSG00000001617.7	SEMA3F	semaphorin 3F	1.30041	5.71e-26	1.58e-24	protein_coding
ENSG00000001626.9	CFTR	cystic fibrosis transmembrane conductance regulator	0	1	NA	protein_coding
ENSG00000001629.5	ANKIB1	ankyrin repeat and IBR domain containing 1	-0.278754	0.000136615	0.00066422	protein_coding
ENSG00000001630.11	CYP51A1	cytochrome P450 family 51 subfamily A member 1	-0.355099	0.011037	0.0338955	protein_coding
ENSG00000001631.10	KRIT1	KRIT1, ankyrin repeat containing	-0.296037	3.51e-05	0.000190712	protein_coding
ENSG00000002016.12	RAD52	RAD52 homolog, DNA repair protein	0.184232	0.30052	0.484393	protein_coding
ENSG00000002330.9	BAD	BCL2 associated agonist of cell death	-0.146457	0.150204	0.291045	protein_coding
ENSG00000002549.8	LAP3	leucine aminopeptidase 3	-0.276602	0.000497858	0.0021509	protein_coding
ENSG00000002586.13	CD99	CD99 molecule	0	1	NA	protein_coding
ENSG00000002587.5	HS3ST1	heparan sulfate-glucosamine 3-sulfotransferase 1	NA	NA	NA	protein_coding
ENSG00000002726.15	AOC1	amine oxidase, copper containing 1	NA	NA	NA	protein_coding
ENSG00000002745.8	WNT16	Wnt family member 16	0.313752	0.218105	NA	protein_coding
ENSG00000002746.9	HECW1	HECT, C2 and WW domain containing E3 ubiquitin protein ligase 1	-0.846293	5.6e-09	5.15e-08	protein_coding
ENSG00000002822.11	MAD1L1	MAD1 mitotic arrest deficient like 1	0.0259376	0.825997	0.910292	protein_coding
ENSG00000002834.13	LASP1	LIM and SH3 protein 1	0.375679	0.00010305	0.000511958	protein_coding
ENSG00000002919.10	SNX11	sorting nexin 11	-0.038606	0.669235	0.810182	protein_coding
ENSG00000002933.3	TMEM176A	transmembrane protein 176A	NA	NA	NA	protein_coding
ENSG00000003056.3	M6PR	mannose-6-phosphate receptor, cation dependent	-0.0801783	0.322277	0.508826	protein_coding
ENSG00000003096.9	KLHL13	kelch like family member 13	0.191333	0.371215	0.560441	protein_coding
ENSG00000003137.4	CYP26B1	cytochrome P450 family 26 subfamily B member 1	-0.785297	4.8e-12	5.83e-11	protein_coding
ENSG00000003147.13	ICA1	islet cell autoantigen 1	0.0909649	0.801862	0.895919	protein_coding
ENSG00000003249.9	DBNDD1	dysbindin domain containing 1	-0.644273	3.68e-07	2.71e-06	protein_coding
ENSG00000003393.10	ALS2	ALS2, alsin Rho guanine nucleotide exchange factor	-0.15098	0.0386828	0.0975741	protein_coding
ENSG00000003400.10	CASP10	caspase 10	1.57489	4.59e-12	5.57e-11	protein_coding
ENSG00000003402.14	CFLAR	CASP8 and FADD like apoptosis regulator	-0.430889	8.8e-08	6.97e-07	protein_coding
ENSG00000003436.10	TFPI	tissue factor pathway inhibitor	-0.668773	1.7e-15	2.65e-14	protein_coding
ENSG00000003509.11	NDUFAF7	NADH:ubiquinone oxidoreductase complex assembly factor 7	0.0785391	0.653437	0.798858	protein_coding
ENSG00000003756.12	RBM5	RNA binding motif protein 5	0.0925694	0.537507	0.71289	protein_coding
ENSG00000003987.9	MTMR7	myotubularin related protein 7	0.10924	0.33918	NA	protein_coding
ENSG00000003989.12	SLC7A2	solute carrier family 7 member 2	0.566707	0.116109	0.237455	protein_coding
ENSG00000004059.6	ARF5	ADP ribosylation factor 5	0.425612	3.31e-08	2.78e-07	protein_coding
ENSG00000004139.9	SARM1	sterile alpha and TIR motif containing 1	0.373679	0.0110675	0.0339622	protein_coding
ENSG00000004142.7	POLDIP2	DNA polymerase delta interacting protein 2	0.27671	0.000552712	0.00236752	protein_coding
ENSG00000004399.8	PLXND1	plexin D1	0.0157992	0.845653	0.921298	protein_coding
ENSG00000004455.12	AK2	adenylate kinase 2	0.194303	0.00370953	0.013045	protein_coding
ENSG00000004468.7	CD38	CD38 molecule	-0.112921	0.326314	NA	protein_coding
ENSG00000004478.5	FKBP4	FK506 binding protein 4	-0.15436	0.100811	0.212321	protein_coding
ENSG00000004487.11	KDM1A	lysine demethylase 1A	0.173728	0.0295366	0.0781523	protein_coding
ENSG00000004534.10	RBM6	RNA binding motif protein 6	0.343231	0.0188617	0.0534726	protein_coding
ENSG00000004660.10	CAMKK1	calcium/calmodulin dependent protein kinase kinase 1	-0.257433	0.0640567	0.147674	protein_coding
ENSG00000004700.11	RECQL	RecQ like helicase	-0.451269	5.98e-11	6.59e-10	protein_coding
ENSG00000004766.11	CCDC132	NA	-0.141081	0.0790976	0.175093	protein_coding
ENSG00000004776.7	HSPB6	heat shock protein family B (small) member 6	-0.104063	0.356743	0.545688	protein_coding
ENSG00000004777.14	ARHGAP33	Rho GTPase activating protein 33	-0.163983	0.474499	0.659891	protein_coding
ENSG00000004779.5	NDUFAB1	NADH:ubiquinone oxidoreductase subunit AB1	-0.231582	0.363245	0.552484	protein_coding
ENSG00000004799.7	PDK4	pyruvate dehydrogenase kinase 4	-1.25173	0.000564045	0.00240866	protein_coding
ENSG00000004809.9	SLC22A16	solute carrier family 22 member 16	-0.738924	0.0052258	NA	protein_coding
ENSG00000004838.9	ZMYND10	zinc finger MYND-type containing 10	-0.351997	0.329423	0.516941	protein_coding
ENSG00000004846.12	ABCB5	ATP binding cassette subfamily B member 5	-0.0868067	0.394197	NA	protein_coding
ENSG00000004848.6	ARX	aristaless related homeobox	-0.136998	0.277186	NA	protein_coding
ENSG00000004864.9	SLC25A13	solute carrier family 25 member 13	-0.0824498	0.463035	0.649204	protein_coding
ENSG00000004866.14	ST7	suppression of tumorigenicity 7	0.00735583	0.941846	0.970949	protein_coding
ENSG00000004897.7	CDC27	cell division cycle 27	-0.0984175	0.098892	0.208989	protein_coding
ENSG00000004939.9	SLC4A1	solute carrier family 4 member 1 (Diego blood group)	NA	NA	NA	protein_coding
ENSG00000004948.9	CALCR	calcitonin receptor	NA	NA	NA	protein_coding
ENSG00000004961.10	HCCS	holocytochrome c synthase	-0.135521	0.0711498	0.160696	protein_coding
ENSG00000004975.7	DVL2	dishevelled segment polarity protein 2	0.00845722	0.926911	0.963109	protein_coding
ENSG00000005001.5	PRSS22	protease, serine 22	-0.108825	0.335768	NA	protein_coding
ENSG00000005007.8	UPF1	UPF1, RNA helicase and ATPase	-0.0775533	0.427327	0.616802	protein_coding
ENSG00000005020.8	SKAP2	src kinase associated phosphoprotein 2	-0.140482	0.0684467	0.155886	protein_coding
ENSG00000005022.5	SLC25A5	solute carrier family 25 member 5	0.290497	6.39e-05	0.000330078	protein_coding
ENSG00000005059.11	CCDC109B	NA	1.58297	7.29e-35	3.03e-33	protein_coding
ENSG00000005073.5	HOXA11	homeobox A11	0.0644286	0.474491	0.659891	protein_coding
ENSG00000005075.11	POLR2J	RNA polymerase II subunit J	0.00986923	0.917218	0.959397	protein_coding
ENSG00000005100.8	DHX33	DEAH-box helicase 33	0.0151046	0.856393	0.926693	protein_coding
ENSG00000005102.8	MEOX1	mesenchyme homeobox 1	-0.209614	0.318178	NA	protein_coding
ENSG00000005108.10	THSD7A	thrombospondin type 1 domain containing 7A	-0.105347	0.755337	0.867647	protein_coding
ENSG00000005156.7	LIG3	DNA ligase 3	0.303072	0.00404333	0.0141099	protein_coding
ENSG00000005175.5	RPAP3	RNA polymerase II associated protein 3	-0.134471	0.112079	0.231096	protein_coding
ENSG00000005187.7	ACSM3	acyl-CoA synthetase medium-chain family member 3	0.333689	0.356908	0.545771	protein_coding
ENSG00000005189.15	AC004381.6	NA	0.120905	0.567825	0.737273	protein_coding
ENSG00000005194.10	CIAPIN1	cytokine induced apoptosis inhibitor 1	-0.0563892	0.520364	0.698863	protein_coding
ENSG00000005238.15	FAM214B	family with sequence similarity 214 member B	-0.542671	2.53e-07	1.91e-06	protein_coding
ENSG00000005243.5	COPZ2	coatomer protein complex subunit zeta 2	-0.569773	3.66e-16	5.96e-15	protein_coding
ENSG00000005249.8	PRKAR2B	protein kinase cAMP-dependent type II regulatory subunit beta	1.08052	4.55e-18	8.33e-17	protein_coding
ENSG00000005302.13	MSL3	male-specific lethal 3 homolog (Drosophila)	0.217219	0.0365926	0.0932989	protein_coding
ENSG00000005339.8	CREBBP	CREB binding protein	0.132988	0.265651	0.445002	protein_coding
ENSG00000005379.11	BZRAP1	NA	2.41767	1.39e-25	3.79e-24	protein_coding
ENSG00000005381.6	MPO	myeloperoxidase	-0.355391	0.0696984	NA	protein_coding
ENSG00000005421.4	PON1	paraoxonase 1	NA	NA	NA	protein_coding
ENSG00000005436.9	GCFC2	GC-rich sequence DNA-binding factor 2	0.0196351	0.831044	0.913104	protein_coding
ENSG00000005448.12	WDR54	WD repeat domain 54	0.236222	0.0672104	0.15352	protein_coding
ENSG00000005469.7	CROT	carnitine O-octanoyltransferase	-0.923504	5.57e-27	1.62e-25	protein_coding
ENSG00000005471.11	ABCB4	ATP binding cassette subfamily B member 4	0.300026	0.067461	0.153963	protein_coding
ENSG00000005483.15	KMT2E	lysine methyltransferase 2E	0.0137045	0.85904	0.928178	protein_coding
ENSG00000005486.12	RHBDD2	rhomboid domain containing 2	-0.693417	4.74e-07	3.45e-06	protein_coding
ENSG00000005513.9	SOX8	SRY-box 8	-1.3132	7.24e-05	0.000370137	protein_coding
ENSG00000005700.10	IBTK	inhibitor of Bruton tyrosine kinase	0.214427	0.000346619	0.00155078	protein_coding
ENSG00000005801.12	ZNF195	zinc finger protein 195	-0.0587205	0.507098	0.687696	protein_coding
ENSG00000005810.13	MYCBP2	MYC binding protein 2, E3 ubiquitin protein ligase	-0.262273	0.202029	0.365128	protein_coding
ENSG00000005812.6	FBXL3	F-box and leucine rich repeat protein 3	0.251215	0.000921794	0.00375622	protein_coding
ENSG00000005844.13	ITGAL	integrin subunit alpha L	0.0387339	0.874984	NA	protein_coding
ENSG00000005882.7	PDK2	pyruvate dehydrogenase kinase 2	-0.434006	1.63e-05	9.34e-05	protein_coding
ENSG00000005884.13	ITGA3	integrin subunit alpha 3	-0.399893	6.51e-07	4.65e-06	protein_coding
ENSG00000005889.11	ZFX	zinc finger protein, X-linked	0.201552	0.00514749	0.017459	protein_coding
ENSG00000005893.11	LAMP2	lysosomal associated membrane protein 2	-0.314591	2.58e-05	0.000142894	protein_coding
ENSG00000005955.8	GGNBP2	gametogenetin binding protein 2	-0.0204346	0.774134	0.879337	protein_coding
ENSG00000005961.13	ITGA2B	integrin subunit alpha 2b	0.263158	0.467311	0.653375	protein_coding
ENSG00000005981.8	ASB4	ankyrin repeat and SOCS box containing 4	NA	NA	NA	protein_coding
ENSG00000006007.7	GDE1	glycerophosphodiester phosphodiesterase 1	-0.448509	5.5e-12	6.63e-11	protein_coding
ENSG00000006015.13	C19orf60	chromosome 19 open reading frame 60	0.0347468	0.754055	0.866576	protein_coding
ENSG00000006016.6	CRLF1	cytokine receptor like factor 1	-0.489122	0.00380921	0.0133571	protein_coding
ENSG00000006025.7	OSBPL7	oxysterol binding protein like 7	0.308766	0.0324205	0.0845212	protein_coding
ENSG00000006042.7	TMEM98	transmembrane protein 98	-0.344116	1.74e-05	9.9e-05	protein_coding
ENSG00000006047.8	YBX2	Y-box binding protein 2	0.577954	0.10779	0.223618	protein_coding
ENSG00000006059.3	KRT33A	keratin 33A	0.0816003	0.421889	NA	protein_coding
ENSG00000006071.7	ABCC8	ATP binding cassette subfamily C member 8	NA	NA	NA	protein_coding
ENSG00000006074.4	CCL18	C-C motif chemokine ligand 18	-0.112921	0.326314	NA	protein_coding
ENSG00000006075.11	CCL3	C-C motif chemokine ligand 3	NA	NA	NA	protein_coding
ENSG00000006114.11	SYNRG	synergin gamma	-0.309011	7.95e-05	0.000403301	protein_coding
ENSG00000006116.3	CACNG3	calcium voltage-gated channel auxiliary subunit gamma 3	NA	NA	NA	protein_coding
ENSG00000006118.10	TMEM132A	transmembrane protein 132A	0.886101	7.14e-18	1.29e-16	protein_coding
ENSG00000006125.12	AP2B1	adaptor related protein complex 2 beta 1 subunit	-0.0809342	0.389623	0.578891	protein_coding
ENSG00000006128.7	TAC1	tachykinin precursor 1	-0.176931	0.213524	NA	protein_coding
ENSG00000006194.6	ZNF263	zinc finger protein 263	-0.196967	0.0322803	0.0843022	protein_coding
ENSG00000006210.6	CX3CL1	C-X3-C motif chemokine ligand 1	-0.156822	0.559212	NA	protein_coding
ENSG00000006282.15	SPATA20	spermatogenesis associated 20	0.00751526	0.904533	0.952284	protein_coding
ENSG00000006283.13	CACNA1G	calcium voltage-gated channel subunit alpha1 G	-0.954968	0.00849055	0.0269583	protein_coding
ENSG00000006327.9	TNFRSF12A	TNF receptor superfamily member 12A	-0.538724	3.53e-09	3.3e-08	protein_coding
ENSG00000006377.9	DLX6	distal-less homeobox 6	0	1	NA	protein_coding
ENSG00000006432.11	MAP3K9	mitogen-activated protein kinase kinase kinase 9	1.29458	6.42e-16	1.03e-14	protein_coding
ENSG00000006451.3	RALA	RAS like proto-oncogene A	0.177385	0.00609181	0.020207	protein_coding
ENSG00000006453.9	BAIAP2L1	BAI1 associated protein 2 like 1	0.130816	0.149681	0.290261	protein_coding
ENSG00000006459.6	JHDM1D	NA	0.580735	8.74e-09	7.87e-08	protein_coding
ENSG00000006468.9	ETV1	ETS variant 1	-1.19069	4.4e-19	8.51e-18	protein_coding
ENSG00000006530.11	AGK	acylglycerol kinase	0.15046	0.134327	0.266775	protein_coding
ENSG00000006534.11	ALDH3B1	aldehyde dehydrogenase 3 family member B1	0.0204428	0.846555	0.921784	protein_coding
ENSG00000006555.6	TTC22	tetratricopeptide repeat domain 22	NA	NA	NA	protein_coding
ENSG00000006576.12	PHTF2	putative homeodomain transcription factor 2	-0.121945	0.05791	0.135968	protein_coding
ENSG00000006606.4	CCL26	C-C motif chemokine ligand 26	0.509675	0.160582	0.306574	protein_coding
ENSG00000006607.8	FARP2	FERM, ARH/RhoGEF and pleckstrin domain protein 2	-0.0114386	0.901239	0.950706	protein_coding
ENSG00000006611.11	USH1C	USH1 protein network component harmonin	-0.0828108	0.41046	NA	protein_coding
ENSG00000006625.13	GGCT	gamma-glutamylcyclotransferase	0.223793	0.0550102	0.130395	protein_coding
ENSG00000006634.3	DBF4	DBF4 zinc finger	0.688427	4.91e-07	3.56e-06	protein_coding
ENSG00000006638.7	TBXA2R	thromboxane A2 receptor	-0.0935549	0.610135	0.768555	protein_coding
ENSG00000006652.9	IFRD1	interferon related developmental regulator 1	-0.147169	0.238343	0.412598	protein_coding
ENSG00000006659.8	LGALS14	galectin 14	NA	NA	NA	protein_coding
ENSG00000006695.6	COX10	COX10, heme A:farnesyltransferase cytochrome c oxidase assembly factor	0.375168	3.89e-05	0.000209206	protein_coding
ENSG00000006704.6	GTF2IRD1	GTF2I repeat domain containing 1	0.235922	0.0212897	0.0592577	protein_coding
ENSG00000006712.10	PAF1	PAF1 homolog, Paf1/RNA polymerase II complex component	-0.131943	0.0821781	0.180414	protein_coding
ENSG00000006715.11	VPS41	VPS41, HOPS complex subunit	-0.469045	2.71e-11	3.07e-10	protein_coding
ENSG00000006740.11	ARHGAP44	Rho GTPase activating protein 44	-0.501985	0.0449852	0.110497	protein_coding
ENSG00000006744.13	ELAC2	elaC ribonuclease Z 2	-0.264356	0.0042983	0.0148961	protein_coding
ENSG00000006747.10	SCIN	scinderin	0.708986	0.038986	0.0982376	protein_coding
ENSG00000006756.11	ARSD	arylsulfatase D	-0.0998548	0.179738	0.334599	protein_coding
ENSG00000006757.7	PNPLA4	patatin like phospholipase domain containing 4	0.297622	0.00377305	0.0132374	protein_coding
ENSG00000006788.7	MYH13	myosin heavy chain 13	-0.246088	0.197009	NA	protein_coding
ENSG00000006831.9	ADIPOR2	adiponectin receptor 2	-0.0767607	0.286431	0.469097	protein_coding
ENSG00000006837.6	CDKL3	cyclin dependent kinase like 3	-0.403287	0.0811832	0.17878	protein_coding
ENSG00000007001.8	UPP2	uridine phosphorylase 2	0.0816003	0.421889	NA	protein_coding
ENSG00000007038.6	PRSS21	protease, serine 21	NA	NA	NA	protein_coding
ENSG00000007047.10	MARK4	microtubule affinity regulating kinase 4	0.0677718	0.458561	0.645195	protein_coding
ENSG00000007062.7	PROM1	prominin 1	-0.108825	0.335768	NA	protein_coding
ENSG00000007080.6	CCDC124	coiled-coil domain containing 124	0.275665	0.0185335	0.0527482	protein_coding
ENSG00000007129.13	CEACAM21	carcinoembryonic antigen related cell adhesion molecule 21	NA	NA	NA	protein_coding
ENSG00000007168.7	PAFAH1B1	platelet activating factor acetylhydrolase 1b regulatory subunit 1	-0.232511	0.000879939	0.00360065	protein_coding
ENSG00000007171.12	NOS2	nitric oxide synthase 2	0.016419	0.945651	NA	protein_coding
ENSG00000007174.12	DNAH9	dynein axonemal heavy chain 9	-0.16654	0.382884	NA	protein_coding
ENSG00000007202.10	KIAA0100	KIAA0100	-0.262518	0.00619865	0.0204989	protein_coding
ENSG00000007216.10	SLC13A2	solute carrier family 13 member 2	0.10924	0.33918	NA	protein_coding
ENSG00000007237.13	GAS7	growth arrest specific 7	1.77955	2.4e-20	5e-19	protein_coding
ENSG00000007255.6	TRAPPC6A	trafficking protein particle complex 6A	0.0347882	0.827546	0.911015	protein_coding
ENSG00000007264.9	MATK	megakaryocyte-associated tyrosine kinase	0.214462	0.246646	NA	protein_coding
ENSG00000007306.10	CEACAM7	carcinoembryonic antigen related cell adhesion molecule 7	NA	NA	NA	protein_coding
ENSG00000007312.8	CD79B	CD79b molecule	1.19094	0.00102498	0.00412943	protein_coding
ENSG00000007314.7	SCN4A	sodium voltage-gated channel alpha subunit 4	-0.0638863	0.797841	NA	protein_coding
ENSG00000007341.14	ST7L	suppression of tumorigenicity 7 like	-0.0113077	0.924031	0.962697	protein_coding
ENSG00000007350.12	TKTL1	transketolase like 1	NA	NA	NA	protein_coding
ENSG00000007372.16	PAX6	paired box 6	-0.0118881	0.927594	NA	protein_coding
ENSG00000007376.3	RPUSD1	RNA pseudouridylate synthase domain containing 1	-0.0145371	0.900269	0.94999	protein_coding
ENSG00000007384.11	RHBDF1	rhomboid 5 homolog 1	-0.261576	0.000963477	0.00390819	protein_coding
ENSG00000007392.12	LUC7L	LUC7 like	0.12083	0.685843	0.821149	protein_coding
ENSG00000007402.7	CACNA2D2	calcium voltage-gated channel auxiliary subunit alpha2delta 2	0.0124211	0.969221	0.984295	protein_coding
ENSG00000007516.9	BAIAP3	BAI1 associated protein 3	1.2642	0.000306986	0.00139006	protein_coding
ENSG00000007520.3	TSR3	TSR3, acp transferase ribosome maturation factor	0.176919	0.0941496	0.201203	protein_coding
ENSG00000007541.10	PIGQ	phosphatidylinositol glycan anchor biosynthesis class Q	0.124626	0.256706	0.434778	protein_coding
ENSG00000007545.11	CRAMP1L	NA	-0.0391064	0.696387	0.827149	protein_coding
ENSG00000007866.14	TEAD3	TEA domain transcription factor 3	0.437124	5.46e-07	3.95e-06	protein_coding
ENSG00000007908.10	SELE	selectin E	NA	NA	NA	protein_coding
ENSG00000007923.11	DNAJC11	DnaJ heat shock protein family (Hsp40) member C11	-0.0802056	0.377252	0.566573	protein_coding
ENSG00000007933.8	FMO3	flavin containing monooxygenase 3	1.22625	4.48e-06	2.81e-05	protein_coding
ENSG00000007944.10	MYLIP	myosin regulatory light chain interacting protein	1.19382	2.21e-12	2.76e-11	protein_coding
ENSG00000007952.13	NOX1	NADPH oxidase 1	-0.252758	0.190075	NA	protein_coding
ENSG00000007968.6	E2F2	E2F transcription factor 2	1.68006	1.02e-07	8.05e-07	protein_coding
ENSG00000008018.8	PSMB1	proteasome subunit beta 1	0.266659	0.000118821	0.000583643	protein_coding
ENSG00000008056.8	SYN1	synapsin I	0.559821	0.0201143	0.0565	protein_coding
ENSG00000008083.9	JARID2	jumonji and AT-rich interaction domain containing 2	0.365768	5.9e-05	0.000306602	protein_coding
ENSG00000008086.6	CDKL5	cyclin dependent kinase like 5	0.129038	0.352561	0.541322	protein_coding
ENSG00000008118.5	CAMK1G	calcium/calmodulin dependent protein kinase IG	0.62773	0.0795213	0.175912	protein_coding
ENSG00000008128.18	CDK11A	cyclin dependent kinase 11A	0.12871	0.697918	0.82827	protein_coding
ENSG00000008130.11	NADK	NAD kinase	-0.214627	0.0139947	0.0415199	protein_coding
ENSG00000008196.8	TFAP2B	transcription factor AP-2 beta	NA	NA	NA	protein_coding
ENSG00000008197.4	TFAP2D	transcription factor AP-2 delta	-0.130103	0.289755	NA	protein_coding
ENSG00000008226.15	DLEC1	deleted in lung and esophageal cancer 1	-0.99843	0.00514665	0.017459	protein_coding
ENSG00000008256.11	CYTH3	cytohesin 3	-0.243419	0.00302337	0.0108841	protein_coding
ENSG00000008277.10	ADAM22	ADAM metallopeptidase domain 22	-0.196427	0.579608	0.745219	protein_coding
ENSG00000008282.3	SYPL1	synaptophysin like 1	-0.123073	0.066286	0.151943	protein_coding
ENSG00000008283.11	CYB561	cytochrome b561	0.180274	0.0641279	0.147803	protein_coding
ENSG00000008294.16	SPAG9	sperm associated antigen 9	-0.16228	0.00549599	0.0184654	protein_coding
ENSG00000008300.10	CELSR3	cadherin EGF LAG seven-pass G-type receptor 3	0.330311	0.00679038	0.0222392	protein_coding
ENSG00000008311.10	AASS	aminoadipate-semialdehyde synthase	0.629685	7.81e-05	0.000396933	protein_coding
ENSG00000008323.11	PLEKHG6	pleckstrin homology and RhoGEF domain containing G6	0.714776	0.0263636	0.0709015	protein_coding
ENSG00000008324.6	SS18L2	SS18 like 2	0.136284	0.474944	0.660304	protein_coding
ENSG00000008382.11	MPND	MPN domain containing	0.41658	0.0085042	0.0269929	protein_coding
ENSG00000008394.8	MGST1	microsomal glutathione S-transferase 1	-0.790459	2.23e-25	5.97e-24	protein_coding
ENSG00000008405.7	CRY1	cryptochrome circadian clock 1	0.100995	0.246226	0.422348	protein_coding
ENSG00000008438.4	PGLYRP1	peptidoglycan recognition protein 1	NA	NA	NA	protein_coding
ENSG00000008441.12	NFIX	nuclear factor I X	-0.0096071	0.921838	0.96161	protein_coding
ENSG00000008513.10	ST3GAL1	ST3 beta-galactoside alpha-2,3-sialyltransferase 1	1.31011	3.43e-60	3.2e-58	protein_coding
ENSG00000008516.12	MMP25	matrix metallopeptidase 25	0.0294048	0.913095	NA	protein_coding
ENSG00000008517.12	IL32	interleukin 32	0.999324	1.32e-08	1.15e-07	protein_coding
ENSG00000008710.13	PKD1	polycystin 1, transient receptor potential channel interacting	-0.215564	0.00161794	0.006219	protein_coding
ENSG00000008735.10	MAPK8IP2	mitogen-activated protein kinase 8 interacting protein 2	0.287788	0.291408	0.474353	protein_coding
ENSG00000008838.13	MED24	mediator complex subunit 24	-0.0302803	0.749874	0.864262	protein_coding
ENSG00000008853.12	RHOBTB2	Rho related BTB domain containing 2	-0.0118338	0.917761	0.95976	protein_coding
ENSG00000008869.7	HEATR5B	HEAT repeat containing 5B	-0.314607	6.55e-06	4e-05	protein_coding
ENSG00000008952.12	SEC62	SEC62 homolog, preprotein translocation factor	-0.315643	1.86e-06	1.24e-05	protein_coding
ENSG00000008988.5	RPS20	ribosomal protein S20	0.304233	0.293493	0.476598	protein_coding
ENSG00000009307.11	CSDE1	cold shock domain containing E1	-0.125589	0.087163	0.188744	protein_coding
ENSG00000009335.13	UBE3C	ubiquitin protein ligase E3C	-0.109587	0.114275	0.23458	protein_coding
ENSG00000009413.11	REV3L	REV3 like, DNA directed polymerase zeta catalytic subunit	0.673521	5.81e-09	5.33e-08	protein_coding
ENSG00000009694.9	TENM1	teneurin transmembrane protein 1	-0.104665	0.55956	NA	protein_coding
ENSG00000009709.7	PAX7	paired box 7	NA	NA	NA	protein_coding
ENSG00000009724.12	MASP2	mannan binding lectin serine peptidase 2	-0.0900799	0.580228	NA	protein_coding
ENSG00000009765.10	IYD	iodotyrosine deiodinase	NA	NA	NA	protein_coding
ENSG00000009780.11	FAM76A	family with sequence similarity 76 member A	-0.124068	0.318465	0.50496	protein_coding
ENSG00000009790.10	TRAF3IP3	TRAF3 interacting protein 3	0.00503875	0.969038	NA	protein_coding
ENSG00000009830.7	POMT2	protein O-mannosyltransferase 2	-0.417846	2e-07	1.52e-06	protein_coding
ENSG00000009844.11	VTA1	vesicle trafficking 1	-0.0307188	0.624207	0.778868	protein_coding
ENSG00000009950.11	MLXIPL	MLX interacting protein like	-0.108825	0.335768	NA	protein_coding
ENSG00000009954.6	BAZ1B	bromodomain adjacent to zinc finger domain 1B	-0.082739	0.388216	0.577591	protein_coding
ENSG00000010017.9	RANBP9	RAN binding protein 9	0.129238	0.0840083	0.183516	protein_coding
ENSG00000010030.9	ETV7	ETS variant 7	0.272763	0.203373	0.366745	protein_coding
ENSG00000010072.11	SPRTN	SprT-like N-terminal domain	-0.324719	0.00154973	0.00598616	protein_coding
ENSG00000010165.14	METTL13	methyltransferase like 13	-0.180936	0.0683076	0.155624	protein_coding
ENSG00000010219.9	DYRK4	dual specificity tyrosine phosphorylation regulated kinase 4	0.537147	6.44e-06	3.94e-05	protein_coding
ENSG00000010244.12	ZNF207	zinc finger protein 207	0.16862	0.0924234	0.19799	protein_coding
ENSG00000010256.6	UQCRC1	ubiquinol-cytochrome c reductase core protein I	0.478974	1.39e-07	1.08e-06	protein_coding
ENSG00000010270.9	STARD3NL	STARD3 N-terminal like	0.11769	0.326081	0.513324	protein_coding
ENSG00000010278.7	CD9	CD9 molecule	0.392944	8.36e-05	0.000422861	protein_coding
ENSG00000010282.10	HHATL	hedgehog acyltransferase-like	-0.112921	0.326314	NA	protein_coding
ENSG00000010292.8	NCAPD2	non-SMC condensin I complex subunit D2	0.28451	0.0140216	0.0415932	protein_coding
ENSG00000010295.15	IFFO1	intermediate filament family orphan 1	-0.0160367	0.898514	0.949472	protein_coding
ENSG00000010310.4	GIPR	gastric inhibitory polypeptide receptor	0.0356222	0.90256	0.951229	protein_coding
ENSG00000010318.14	PHF7	PHD finger protein 7	-0.219058	0.24698	0.423024	protein_coding
ENSG00000010319.2	SEMA3G	semaphorin 3G	0.0716148	0.749079	NA	protein_coding
ENSG00000010322.11	NISCH	nischarin	-0.315948	5.54e-06	3.43e-05	protein_coding
ENSG00000010327.6	STAB1	stabilin 1	-0.513532	0.0602343	NA	protein_coding
ENSG00000010361.9	FUZ	fuzzy planar cell polarity protein	0.567418	0.000447122	0.0019489	protein_coding
ENSG00000010379.11	SLC6A13	solute carrier family 6 member 13	-0.129772	0.505273	NA	protein_coding
ENSG00000010404.13	IDS	iduronate 2-sulfatase	-0.809935	1.56e-28	4.85e-27	protein_coding
ENSG00000010438.12	PRSS3	protease, serine 3	0.355601	0.247756	0.423833	protein_coding
ENSG00000010539.7	ZNF200	zinc finger protein 200	0.0955646	0.403253	0.592163	protein_coding
ENSG00000010610.5	CD4	CD4 molecule	-0.961083	0.00673112	0.022066	protein_coding
ENSG00000010626.10	LRRC23	leucine rich repeat containing 23	-0.22738	0.137272	0.271358	protein_coding
ENSG00000010671.11	BTK	Bruton tyrosine kinase	0.166428	0.231933	NA	protein_coding
ENSG00000010704.14	HFE	hemochromatosis	-0.254178	0.00594437	0.0197917	protein_coding
ENSG00000010803.12	SCMH1	sex comb on midleg homolog 1 (Drosophila)	0.23893	0.00150986	0.00584139	protein_coding
ENSG00000010810.12	FYN	FYN proto-oncogene, Src family tyrosine kinase	0.428318	2.08e-06	1.37e-05	protein_coding
ENSG00000010818.4	HIVEP2	human immunodeficiency virus type I enhancer binding protein 2	-0.244937	0.0155034	0.0453095	protein_coding
ENSG00000010932.11	FMO1	flavin containing monooxygenase 1	2.05553	6.63e-13	8.64e-12	protein_coding
ENSG00000011007.7	TCEB3	NA	-0.318998	2.13e-05	0.000120001	protein_coding
ENSG00000011009.6	LYPLA2	lysophospholipase II	0.0823961	0.401033	0.589845	protein_coding
ENSG00000011021.17	CLCN6	chloride voltage-gated channel 6	0.300045	0.0254702	0.068922	protein_coding
ENSG00000011028.9	MRC2	mannose receptor C type 2	-0.168553	0.0437442	0.108072	protein_coding
ENSG00000011052.16	NME2	NME/NM23 nucleoside diphosphate kinase 2	NA	NA	NA	protein_coding
ENSG00000011083.4	SLC6A7	solute carrier family 6 member 7	NA	NA	NA	protein_coding
ENSG00000011105.7	TSPAN9	tetraspanin 9	-0.334582	5.45e-05	0.000285657	protein_coding
ENSG00000011114.10	BTBD7	BTB domain containing 7	-0.255443	0.00824161	0.0262586	protein_coding
ENSG00000011132.7	APBA3	amyloid beta precursor protein binding family A member 3	0.0616811	0.580809	0.745873	protein_coding
ENSG00000011143.12	MKS1	Meckel syndrome, type 1	0.4519	0.000231492	0.0010759	protein_coding
ENSG00000011198.3	ABHD5	abhydrolase domain containing 5	-0.0801496	0.391837	0.580916	protein_coding
ENSG00000011201.6	KAL1	NA	0.0579743	0.778805	0.882041	protein_coding
ENSG00000011243.12	AKAP8L	A-kinase anchoring protein 8 like	-0.336051	0.000280607	0.00128158	protein_coding
ENSG00000011258.11	MBTD1	mbt domain containing 1	0.485291	6.77e-07	4.82e-06	protein_coding
ENSG00000011260.9	UTP18	UTP18, small subunit processome component	0.348169	1.3e-05	7.6e-05	protein_coding
ENSG00000011275.14	RNF216	ring finger protein 216	-0.144875	0.137497	0.271692	protein_coding
ENSG00000011295.11	TTC19	tetratricopeptide repeat domain 19	-0.0946408	0.244296	0.420227	protein_coding
ENSG00000011304.12	PTBP1	polypyrimidine tract binding protein 1	0.161073	0.0687413	0.156398	protein_coding
ENSG00000011332.15	DPF1	double PHD fingers 1	-0.0251856	0.925735	0.963109	protein_coding
ENSG00000011347.5	SYT7	synaptotagmin 7	-1.18786	0.00105282	0.00423202	protein_coding
ENSG00000011376.5	LARS2	leucyl-tRNA synthetase 2, mitochondrial	0.164771	0.0436275	0.107838	protein_coding
ENSG00000011405.9	PIK3C2A	phosphatidylinositol-4-phosphate 3-kinase catalytic subunit type 2 alpha	-0.0961152	0.270688	0.450702	protein_coding
ENSG00000011422.7	PLAUR	plasminogen activator, urokinase receptor	0.335995	0.000203799	0.00095751	protein_coding
ENSG00000011426.6	ANLN	anillin actin binding protein	1.9447	1.88e-117	6.93e-115	protein_coding
ENSG00000011451.12	WIZ	widely interspaced zinc finger motifs	-0.264248	0.0135806	0.0404566	protein_coding
ENSG00000011454.12	RABGAP1	RAB GTPase activating protein 1	0.321369	1.46e-05	8.41e-05	protein_coding
ENSG00000011465.12	DCN	decorin	0.640481	4.6e-08	3.79e-07	protein_coding
ENSG00000011478.7	QPCTL	glutaminyl-peptide cyclotransferase like	-0.625512	1.28e-06	8.76e-06	protein_coding
ENSG00000011485.10	PPP5C	protein phosphatase 5 catalytic subunit	0.282601	0.00379183	0.013301	protein_coding
ENSG00000011523.9	CEP68	centrosomal protein 68	0.0978245	0.373552	0.562766	protein_coding
ENSG00000011566.9	MAP4K3	mitogen-activated protein kinase kinase kinase kinase 3	-0.000881183	0.989648	0.99533	protein_coding
ENSG00000011590.9	ZBTB32	zinc finger and BTB domain containing 32	-0.0569894	0.678561	NA	protein_coding
ENSG00000011600.7	TYROBP	TYRO protein tyrosine kinase binding protein	NA	NA	NA	protein_coding
ENSG00000011638.6	TMEM159	transmembrane protein 159	0.00109166	0.991103	0.995737	protein_coding
ENSG00000011677.7	GABRA3	gamma-aminobutyric acid type A receptor alpha3 subunit	-0.108825	0.335768	NA	protein_coding
ENSG00000012048.15	BRCA1	BRCA1, DNA repair associated	0.329404	0.0120167	0.0364652	protein_coding
ENSG00000012061.11	ERCC1	ERCC excision repair 1, endonuclease non-catalytic subunit	0.275831	8.45e-05	0.000426943	protein_coding
ENSG00000012124.10	CD22	CD22 molecule	-0.118375	0.630657	NA	protein_coding
ENSG00000012174.7	MBTPS2	membrane bound transcription factor peptidase, site 2	-0.357283	2.4e-06	1.56e-05	protein_coding
ENSG00000012211.8	PRICKLE3	prickle planar cell polarity protein 3	0.192898	0.215322	0.382447	protein_coding
ENSG00000012223.8	LTF	lactotransferrin	-0.0823671	0.673654	NA	protein_coding
ENSG00000012232.4	EXTL3	exostosin like glycosyltransferase 3	-0.147085	0.0482176	0.116955	protein_coding
ENSG00000012504.9	NR1H4	nuclear receptor subfamily 1 group H member 4	NA	NA	NA	protein_coding
ENSG00000012660.9	ELOVL5	ELOVL fatty acid elongase 5	0.27106	1.64e-05	9.39e-05	protein_coding
ENSG00000012779.6	ALOX5	arachidonate 5-lipoxygenase	NA	NA	NA	protein_coding
ENSG00000012817.11	KDM5D	lysine demethylase 5D	-0.00737174	0.945289	0.972961	protein_coding
ENSG00000012822.11	CALCOCO1	calcium binding and coiled-coil domain 1	-0.604966	7.36e-20	1.49e-18	protein_coding
ENSG00000012963.9	UBR7	ubiquitin protein ligase E3 component n-recognin 7 (putative)	-0.537024	1.66e-07	1.28e-06	protein_coding
ENSG00000012983.7	MAP4K5	mitogen-activated protein kinase kinase kinase kinase 5	-0.173572	0.00559129	0.0187468	protein_coding
ENSG00000013016.10	EHD3	EH domain containing 3	0.869383	8.44e-23	1.99e-21	protein_coding
ENSG00000013275.3	PSMC4	proteasome 26S subunit, ATPase 4	0.0429178	0.603066	0.763343	protein_coding
ENSG00000013288.4	MAN2B2	mannosidase alpha class 2B member 2	-0.867942	8.77e-24	2.19e-22	protein_coding
ENSG00000013293.4	SLC7A14	solute carrier family 7 member 14	-1.24191	4.88e-08	4.01e-07	protein_coding
ENSG00000013297.6	CLDN11	claudin 11	0.581023	0.00162481	0.00623957	protein_coding
ENSG00000013306.11	SLC25A39	solute carrier family 25 member 39	-0.162274	0.0624281	0.144702	protein_coding
ENSG00000013364.14	MVP	major vault protein	0.20194	0.0634415	0.146639	protein_coding
ENSG00000013374.11	NUB1	negative regulator of ubiquitin like proteins 1	-0.0797846	0.262896	0.441862	protein_coding
ENSG00000013375.10	PGM3	phosphoglucomutase 3	-0.0885671	0.208086	0.373285	protein_coding
ENSG00000013392.6	RWDD2A	RWD domain containing 2A	-0.393249	0.00149044	0.00577653	protein_coding
ENSG00000013441.11	CLK1	CDC like kinase 1	-0.199135	0.569853	0.738877	protein_coding
ENSG00000013503.5	POLR3B	RNA polymerase III subunit B	-0.0643846	0.513019	0.692708	protein_coding
ENSG00000013523.5	ANGEL1	angel homolog 1	-0.318139	0.000462725	0.00201199	protein_coding
ENSG00000013561.13	RNF14	ring finger protein 14	-0.606529	1.42e-13	1.95e-12	protein_coding
ENSG00000013563.8	DNASE1L1	deoxyribonuclease 1 like 1	-0.716696	5.61e-17	9.6e-16	protein_coding
ENSG00000013573.12	DDX11	DEAD/H-box helicase 11	0.170534	0.263768	0.44292	protein_coding
ENSG00000013583.4	HEBP1	heme binding protein 1	-0.178798	0.0097734	0.0304441	protein_coding
ENSG00000013588.5	GPRC5A	G protein-coupled receptor class C group 5 member A	0.0296422	0.646776	0.794399	protein_coding
ENSG00000013619.9	MAMLD1	mastermind like domain containing 1	0.831241	2.04e-12	2.56e-11	protein_coding
ENSG00000013725.10	CD6	CD6 molecule	-0.108825	0.335768	NA	protein_coding
ENSG00000013810.14	TACC3	transforming acidic coiled-coil containing protein 3	1.4206	1.53e-26	4.36e-25	protein_coding
ENSG00000014123.9	UFL1	UFM1 specific ligase 1	-0.0573535	0.453725	0.640831	protein_coding
ENSG00000014138.4	POLA2	DNA polymerase alpha 2, accessory subunit	-0.358035	0.00405646	0.0141481	protein_coding
ENSG00000014164.6	ZC3H3	zinc finger CCCH-type containing 3	0.0892917	0.444758	0.633096	protein_coding
ENSG00000014216.11	CAPN1	calpain 1	0.224945	0.0215438	0.0598715	protein_coding
ENSG00000014257.11	ACPP	acid phosphatase, prostate	1.52071	1.09e-05	6.43e-05	protein_coding
ENSG00000014641.13	MDH1	malate dehydrogenase 1	-0.280334	0.00656539	0.0215814	protein_coding
ENSG00000014824.8	SLC30A9	solute carrier family 30 member 9	-0.0393118	0.53509	0.710743	protein_coding
ENSG00000014914.15	MTMR11	myotubularin related protein 11	-0.447555	0.00129625	0.0050996	protein_coding
ENSG00000014919.8	COX15	COX15, cytochrome c oxidase assembly homolog	0.0722893	0.372635	0.561663	protein_coding
ENSG00000015133.14	CCDC88C	coiled-coil domain containing 88C	-0.0908674	0.776117	0.880363	protein_coding
ENSG00000015153.10	YAF2	YY1 associated factor 2	-0.0671529	0.628874	0.781971	protein_coding
ENSG00000015171.14	ZMYND11	zinc finger MYND-type containing 11	-0.036361	0.615333	0.771952	protein_coding
ENSG00000015285.6	WAS	Wiskott-Aldrich syndrome	-0.187047	0.607048	0.766007	protein_coding
ENSG00000015413.5	DPEP1	dipeptidase 1 (renal)	NA	NA	NA	protein_coding
ENSG00000015475.14	BID	BH3 interacting domain death agonist	0.0915026	0.338425	0.52693	protein_coding
ENSG00000015479.13	MATR3	matrin 3	0.0626635	0.285685	0.468423	protein_coding
ENSG00000015520.10	NPC1L1	NPC1 like intracellular cholesterol transporter 1	-0.0918982	0.606033	NA	protein_coding
ENSG00000015532.5	XYLT2	xylosyltransferase 2	0.0071266	0.940995	0.970685	protein_coding
ENSG00000015568.8	RGPD5	RANBP2-like and GRIP domain containing 5	-0.450199	0.215456	0.382547	protein_coding
ENSG00000015592.12	STMN4	stathmin 4	-0.108632	0.544673	NA	protein_coding
ENSG00000015676.12	NUDCD3	NudC domain containing 3	-0.490594	2.68e-09	2.54e-08	protein_coding
ENSG00000016082.10	ISL1	ISL LIM homeobox 1	1.83055	1.75e-07	1.34e-06	protein_coding
ENSG00000016391.5	CHDH	choline dehydrogenase	1.27515	3.29e-06	2.1e-05	protein_coding
ENSG00000016402.8	IL20RA	interleukin 20 receptor subunit alpha	-0.0865217	0.798701	0.894103	protein_coding
ENSG00000016490.11	CLCA1	chloride channel accessory 1	NA	NA	NA	protein_coding
ENSG00000016602.8	CLCA4	chloride channel accessory 4	NA	NA	NA	protein_coding
ENSG00000016864.12	GLT8D1	glycosyltransferase 8 domain containing 1	-0.0558746	0.46398	0.650156	protein_coding
ENSG00000017260.15	ATP2C1	ATPase secretory pathway Ca2+ transporting 1	-0.435248	2.44e-13	3.29e-12	protein_coding
ENSG00000017373.11	SRCIN1	SRC kinase signaling inhibitor 1	-0.2344	0.508259	0.68865	protein_coding
ENSG00000017427.11	IGF1	insulin like growth factor 1	-0.987462	2.73e-06	1.76e-05	protein_coding
ENSG00000017483.10	SLC38A5	solute carrier family 38 member 5	1.2551	1.78e-05	0.000101337	protein_coding
ENSG00000017621.11	MAGIX	MAGI family member, X-linked	0.181835	0.614701	0.771735	protein_coding
ENSG00000017797.7	RALBP1	ralA binding protein 1	0.00453616	0.959358	0.979464	protein_coding
ENSG00000018189.8	RUFY3	RUN and FYVE domain containing 3	-0.0138269	0.913631	0.957947	protein_coding
ENSG00000018236.10	CNTN1	contactin 1	-0.627295	0.0371933	0.0945842	protein_coding
ENSG00000018280.12	SLC11A1	solute carrier family 11 member 1	0.439691	0.21601	0.383356	protein_coding
ENSG00000018408.10	WWTR1	WW domain containing transcription regulator 1	0.146387	0.0559706	0.132191	protein_coding
ENSG00000018510.8	AGPS	alkylglycerone phosphate synthase	-0.00285318	0.970579	0.985116	protein_coding
ENSG00000018610.8	CXorf56	chromosome X open reading frame 56	-0.1637	0.103768	0.21737	protein_coding
ENSG00000018625.10	ATP1A2	ATPase Na+/K+ transporting subunit alpha 2	1.19098	7.47e-06	4.52e-05	protein_coding
ENSG00000018699.7	TTC27	tetratricopeptide repeat domain 27	0.208429	0.0207846	0.0580996	protein_coding
ENSG00000018869.12	ZNF582	zinc finger protein 582	-0.542051	0.00242542	0.00895876	protein_coding
ENSG00000019102.7	VSIG2	V-set and immunoglobulin domain containing 2	0.00658798	0.954207	NA	protein_coding
ENSG00000019144.12	PHLDB1	pleckstrin homology like domain family B member 1	-0.597349	9.83e-11	1.07e-09	protein_coding
ENSG00000019169.9	MARCO	macrophage receptor with collagenous structure	NA	NA	NA	protein_coding
ENSG00000019186.5	CYP24A1	cytochrome P450 family 24 subfamily A member 1	NA	NA	NA	protein_coding
ENSG00000019485.8	PRDM11	PR/SET domain 11	0.306968	0.0221153	0.0612079	protein_coding
ENSG00000019505.3	SYT13	synaptotagmin 13	-0.136348	0.277744	NA	protein_coding
ENSG00000019549.4	SNAI2	snail family transcriptional repressor 2	-0.0161448	0.831579	0.913538	protein_coding
ENSG00000019582.10	CD74	CD74 molecule	0.76006	0.034897	0.0897705	protein_coding
ENSG00000019991.11	HGF	hepatocyte growth factor	-0.180574	0.368707	0.5579	protein_coding
ENSG00000019995.6	ZRANB1	zinc finger RANBP2-type containing 1	0.173118	0.02637	0.0709089	protein_coding
ENSG00000020129.11	NCDN	neurochondrin	-0.471716	2.51e-05	0.000139434	protein_coding
ENSG00000020181.13	GPR124	NA	0.929064	4.42e-21	9.53e-20	protein_coding
ENSG00000020256.15	ZFP64	ZFP64 zinc finger protein	0.218166	0.0359808	0.0920747	protein_coding
ENSG00000020426.6	MNAT1	MNAT1, CDK activating kinase assembly factor	0.111625	0.45063	0.638652	protein_coding
ENSG00000020577.9	SAMD4A	sterile alpha motif domain containing 4A	-0.588659	3.64e-20	7.5e-19	protein_coding
ENSG00000020633.14	RUNX3	runt related transcription factor 3	-1.20304	5.95e-11	6.56e-10	protein_coding
ENSG00000020922.8	MRE11A	NA	-0.181925	0.0370573	0.0942752	protein_coding
ENSG00000021300.9	PLEKHB1	pleckstrin homology domain containing B1	0.131611	0.716481	0.840969	protein_coding
ENSG00000021355.8	SERPINB1	serpin family B member 1	0.731816	1.45e-24	3.76e-23	protein_coding
ENSG00000021461.12	CYP3A43	cytochrome P450 family 3 subfamily A member 43	NA	NA	NA	protein_coding
ENSG00000021488.8	SLC7A9	solute carrier family 7 member 9	-0.0617151	0.773802	NA	protein_coding
ENSG00000021574.7	SPAST	spastin	-0.231265	0.00142804	0.0055666	protein_coding
ENSG00000021645.13	NRXN3	neurexin 3	-0.951881	4.26e-16	6.88e-15	protein_coding
ENSG00000021762.15	OSBPL5	oxysterol binding protein like 5	0.647227	1.66e-10	1.77e-09	protein_coding
ENSG00000021776.6	AQR	aquarius intron-binding spliceosomal factor	0.116601	0.095946	0.204062	protein_coding
ENSG00000021826.10	CPS1	carbamoyl-phosphate synthase 1	0.373361	0.000366206	0.00162958	protein_coding
ENSG00000021852.8	C8B	complement C8 beta chain	NA	NA	NA	protein_coding
ENSG00000022267.12	FHL1	four and a half LIM domains 1	-0.31822	1.76e-07	1.35e-06	protein_coding
ENSG00000022277.8	RTFDC1	replication termination factor 2 domain containing 1	0.156618	0.0322915	0.0843022	protein_coding
ENSG00000022355.10	GABRA1	gamma-aminobutyric acid type A receptor alpha1 subunit	-0.108825	0.335768	NA	protein_coding
ENSG00000022556.11	NLRP2	NLR family pyrin domain containing 2	-0.742804	0.00743893	0.0240959	protein_coding
ENSG00000022567.5	SLC45A4	solute carrier family 45 member 4	-0.0628903	0.590338	0.753849	protein_coding
ENSG00000022840.11	RNF10	ring finger protein 10	0.00591201	0.942724	0.971639	protein_coding
ENSG00000022976.11	ZNF839	zinc finger protein 839	0.0156719	0.901723	0.950712	protein_coding
ENSG00000023041.7	ZDHHC6	zinc finger DHHC-type containing 6	0.241587	0.0429867	0.106469	protein_coding
ENSG00000023171.10	GRAMD1B	GRAM domain containing 1B	-0.411262	6.53e-06	3.99e-05	protein_coding
ENSG00000023191.12	RNH1	ribonuclease/angiogenin inhibitor 1	-0.179311	0.10007	0.211002	protein_coding
ENSG00000023228.8	NDUFS1	NADH:ubiquinone oxidoreductase core subunit S1	-0.11178	0.104245	0.218042	protein_coding
ENSG00000023287.8	RB1CC1	RB1 inducible coiled-coil 1	-0.085356	0.318959	0.505297	protein_coding
ENSG00000023318.7	ERP44	endoplasmic reticulum protein 44	-0.147597	0.01368	0.0406908	protein_coding
ENSG00000023330.10	ALAS1	5'-aminolevulinate synthase 1	0.31815	0.000394393	0.00173998	protein_coding
ENSG00000023445.9	BIRC3	baculoviral IAP repeat containing 3	0.227072	0.224959	0.394732	protein_coding
ENSG00000023516.7	AKAP11	A-kinase anchoring protein 11	-0.54022	1.31e-05	7.62e-05	protein_coding
ENSG00000023572.4	GLRX2	glutaredoxin 2	0.166142	0.156477	0.300252	protein_coding
ENSG00000023608.4	SNAPC1	small nuclear RNA activating complex polypeptide 1	0.424906	2.68e-05	0.000147619	protein_coding
ENSG00000023697.8	DERA	deoxyribose-phosphate aldolase	0.471012	1.14e-07	8.92e-07	protein_coding
ENSG00000023734.6	STRAP	serine/threonine kinase receptor associated protein	0.0329731	0.605389	0.76495	protein_coding
ENSG00000023839.6	ABCC2	ATP binding cassette subfamily C member 2	-0.835615	0.00903773	0.0284192	protein_coding
ENSG00000023892.9	DEF6	DEF6, guanine nucleotide exchange factor	1.23517	7.75e-07	5.47e-06	protein_coding
ENSG00000023902.9	PLEKHO1	pleckstrin homology domain containing O1	0.999153	4.44e-30	1.48e-28	protein_coding
ENSG00000023909.5	GCLM	glutamate-cysteine ligase modifier subunit	0.137886	0.071475	0.161208	protein_coding
ENSG00000024048.6	UBR2	ubiquitin protein ligase E3 component n-recognin 2	-0.0339283	0.690332	0.823956	protein_coding
ENSG00000024422.7	EHD2	EH domain containing 2	-0.0996768	0.367221	0.556457	protein_coding
ENSG00000024526.12	DEPDC1	DEP domain containing 1	2.2008	6.46e-39	3.09e-37	protein_coding
ENSG00000024862.12	CCDC28A	coiled-coil domain containing 28A	-0.0220892	0.841301	0.919268	protein_coding
ENSG00000025039.9	RRAGD	Ras related GTP binding D	-0.00683184	0.983978	0.992441	protein_coding
ENSG00000025156.7	HSF2	heat shock transcription factor 2	0.312008	0.00267269	0.00977257	protein_coding
ENSG00000025293.11	PHF20	PHD finger protein 20	-0.114078	0.198255	0.359702	protein_coding
ENSG00000025423.7	HSD17B6	hydroxysteroid 17-beta dehydrogenase 6	-1.03763	8.35e-29	2.63e-27	protein_coding
ENSG00000025434.14	NR1H3	nuclear receptor subfamily 1 group H member 3	2.02545	2.18e-29	7.09e-28	protein_coding
ENSG00000025708.8	TYMP	thymidine phosphorylase	1.87274	1e-46	6.41e-45	protein_coding
ENSG00000025770.14	NCAPH2	non-SMC condensin II complex subunit H2	-0.0914159	0.330249	0.517905	protein_coding
ENSG00000025772.7	TOMM34	translocase of outer mitochondrial membrane 34	-0.146613	0.139738	0.275093	protein_coding
ENSG00000025796.9	SEC63	SEC63 homolog, protein translocation regulator	-0.152295	0.0163452	0.0474017	protein_coding
ENSG00000025800.9	KPNA6	karyopherin subunit alpha 6	-0.175947	0.0511043	0.122849	protein_coding
ENSG00000026025.9	VIM	vimentin	0.226019	0.00922084	0.0289143	protein_coding
ENSG00000026036.16	RTEL1-TNFRSF6B	RTEL1-TNFRSF6B readthrough (NMD candidate)	0.394589	0.224892	0.394684	protein_coding
ENSG00000026103.15	FAS	Fas cell surface death receptor	-0.190233	0.0896873	0.193249	protein_coding
ENSG00000026297.11	RNASET2	ribonuclease T2	-0.664779	4.88e-08	4.01e-07	protein_coding
ENSG00000026508.12	CD44	CD44 molecule (Indian blood group)	-0.406732	2.26e-10	2.37e-09	protein_coding
ENSG00000026559.8	KCNG1	potassium voltage-gated channel modifier subfamily G member 1	1.77802	4.04e-17	6.99e-16	protein_coding
ENSG00000026652.9	AGPAT4	1-acylglycerol-3-phosphate O-acyltransferase 4	0.889311	8.7e-10	8.63e-09	protein_coding
ENSG00000026751.12	SLAMF7	SLAM family member 7	-0.0868067	0.394197	NA	protein_coding
ENSG00000026950.12	BTN3A1	butyrophilin subfamily 3 member A1	0.432116	1.75e-05	9.96e-05	protein_coding
ENSG00000027001.7	MIPEP	mitochondrial intermediate peptidase	-0.0678209	0.532297	0.708027	protein_coding
ENSG00000027075.9	PRKCH	protein kinase C eta	-1.06215	5.25e-08	4.28e-07	protein_coding
ENSG00000027644.4	INSRR	insulin receptor related receptor	-0.0804588	0.55111	NA	protein_coding
ENSG00000027697.8	IFNGR1	interferon gamma receptor 1	0.0705361	0.502624	0.683396	protein_coding
ENSG00000027847.9	B4GALT7	beta-1,4-galactosyltransferase 7	0.122331	0.182855	0.339019	protein_coding
ENSG00000027869.7	SH2D2A	SH2 domain containing 2A	0.232019	0.470972	0.656758	protein_coding
ENSG00000028116.12	VRK2	vaccinia related kinase 2	0.151745	0.0500449	0.120774	protein_coding
ENSG00000028137.12	TNFRSF1B	TNF receptor superfamily member 1B	2.50034	6.11e-19	1.17e-17	protein_coding
ENSG00000028203.13	VEZT	vezatin, adherens junctions transmembrane protein	0.168415	0.00974165	0.0303742	protein_coding
ENSG00000028277.16	POU2F2	POU class 2 homeobox 2	0.363081	0.00372568	0.0130931	protein_coding
ENSG00000028310.13	BRD9	bromodomain containing 9	0.0955688	0.264145	0.443161	protein_coding
ENSG00000028528.10	SNX1	sorting nexin 1	-0.344965	1.64e-08	1.42e-07	protein_coding
ENSG00000028839.5	TBPL1	TATA-box binding protein like 1	-0.0683064	0.443267	0.632031	protein_coding
ENSG00000029153.10	ARNTL2	aryl hydrocarbon receptor nuclear translocator like 2	0.658063	4.09e-13	5.4e-12	protein_coding
ENSG00000029363.11	BCLAF1	BCL2 associated transcription factor 1	-0.0105656	0.862767	0.930113	protein_coding
ENSG00000029364.7	SLC39A9	solute carrier family 39 member 9	-0.449287	8.51e-15	1.28e-13	protein_coding
ENSG00000029534.15	ANK1	ankyrin 1	-1.3183	5.56e-35	2.33e-33	protein_coding
ENSG00000029559.5	IBSP	integrin binding sialoprotein	-0.112921	0.326314	NA	protein_coding
ENSG00000029639.6	TFB1M	transcription factor B1, mitochondrial	-0.130541	0.402677	0.591511	protein_coding
ENSG00000029725.12	RABEP1	rabaptin, RAB GTPase binding effector protein 1	-0.252987	0.00224257	0.00835588	protein_coding
ENSG00000029993.10	HMGB3	high mobility group box 3	0.841635	8.22e-15	1.24e-13	protein_coding
ENSG00000030066.9	NUP160	nucleoporin 160	0.0568232	0.489175	0.672328	protein_coding
ENSG00000030110.8	BAK1	BCL2 antagonist/killer 1	0.114216	0.249069	0.425517	protein_coding
ENSG00000030304.8	MUSK	muscle associated receptor tyrosine kinase	0.199658	0.466774	0.652904	protein_coding
ENSG00000030419.12	IKZF2	IKAROS family zinc finger 2	-0.741076	5.44e-15	8.31e-14	protein_coding
ENSG00000030582.12	GRN	granulin precursor	-0.720753	5.43e-12	6.54e-11	protein_coding
ENSG00000031003.6	FAM13B	family with sequence similarity 13 member B	-0.68789	9.2e-29	2.89e-27	protein_coding
ENSG00000031081.6	ARHGAP31	Rho GTPase activating protein 31	0.1358	0.228354	0.399186	protein_coding
ENSG00000031691.6	CENPQ	centromere protein Q	-0.0605145	0.77012	0.876506	protein_coding
ENSG00000031698.8	SARS	seryl-tRNA synthetase	0.256496	0.000733064	0.00305129	protein_coding
ENSG00000031823.10	RANBP3	RAN binding protein 3	-0.176784	0.0855146	0.186087	protein_coding
ENSG00000032219.14	ARID4A	AT-rich interaction domain 4A	-0.270201	0.000294804	0.00134017	protein_coding
ENSG00000032389.8	TSSC1	tumor suppressing subtransferable candidate 1	0.129923	0.248728	0.425109	protein_coding
ENSG00000032444.11	PNPLA6	patatin like phospholipase domain containing 6	-0.0153774	0.877975	0.938347	protein_coding
ENSG00000032742.13	IFT88	intraflagellar transport 88	-0.0242751	0.816485	0.904772	protein_coding
ENSG00000033011.7	ALG1	ALG1, chitobiosyldiphosphodolichol beta-mannosyltransferase	-0.00397774	0.964978	0.981561	protein_coding
ENSG00000033030.9	ZCCHC8	zinc finger CCHC-type containing 8	0.242697	0.0195927	0.055249	protein_coding
ENSG00000033050.3	ABCF2	ATP binding cassette subfamily F member 2	-0.0856167	0.359423	0.548252	protein_coding
ENSG00000033100.10	CHPF2	chondroitin polymerizing factor 2	-0.428155	2.94e-10	3.05e-09	protein_coding
ENSG00000033122.13	LRRC7	leucine rich repeat containing 7	1.91272	3.66e-21	7.92e-20	protein_coding
ENSG00000033170.12	FUT8	fucosyltransferase 8	0.166235	0.039287	0.0988432	protein_coding
ENSG00000033178.7	UBA6	ubiquitin like modifier activating enzyme 6	-0.173582	0.0155679	0.0454776	protein_coding
ENSG00000033327.8	GAB2	GRB2 associated binding protein 2	0.157514	0.078755	0.174492	protein_coding
ENSG00000033627.10	ATP6V0A1	ATPase H+ transporting V0 subunit a1	-0.659194	1.69e-20	3.53e-19	protein_coding
ENSG00000033800.9	PIAS1	protein inhibitor of activated STAT 1	-0.225503	0.000888688	0.00363266	protein_coding
ENSG00000033867.12	SLC4A7	solute carrier family 4 member 7	-0.650521	2.43e-20	5.05e-19	protein_coding
ENSG00000034053.10	APBA2	amyloid beta precursor protein binding family A member 2	0.577327	5.6e-07	4.04e-06	protein_coding
ENSG00000034152.14	MAP2K3	mitogen-activated protein kinase kinase 3	0.135628	0.176526	0.330159	protein_coding
ENSG00000034239.6	EFCAB1	EF-hand calcium binding domain 1	-0.132221	0.685774	0.821149	protein_coding
ENSG00000034510.4	TMSB10	thymosin beta 10	0.443747	0.000251574	0.00116007	protein_coding
ENSG00000034533.7	ASTE1	asteroid homolog 1 (Drosophila)	-0.110859	0.43315	0.622226	protein_coding
ENSG00000034677.7	RNF19A	ring finger protein 19A, RBR E3 ubiquitin protein ligase	-0.126714	0.0380137	0.0962457	protein_coding
ENSG00000034693.10	PEX3	peroxisomal biogenesis factor 3	-0.483113	0.000103895	0.000515503	protein_coding
ENSG00000034713.3	GABARAPL2	GABA type A receptor associated protein like 2	-0.422424	0.00109052	0.00437011	protein_coding
ENSG00000034971.9	MYOC	myocilin	-0.272852	0.348499	0.536936	protein_coding
ENSG00000035115.17	SH3YL1	SH3 and SYLF domain containing 1	-0.20877	0.0416211	0.103793	protein_coding
ENSG00000035141.3	FAM136A	family with sequence similarity 136 member A	0.52245	8.47e-11	9.23e-10	protein_coding
ENSG00000035403.12	VCL	vinculin	0.0171349	0.800277	0.894803	protein_coding
ENSG00000035499.8	DEPDC1B	DEP domain containing 1B	2.03404	1.66e-11	1.9e-10	protein_coding
ENSG00000035664.7	DAPK2	death associated protein kinase 2	1.16244	1.01e-38	4.78e-37	protein_coding
ENSG00000035681.3	NSMAF	neutral sphingomyelinase activation associated factor	0.345939	6.47e-07	4.62e-06	protein_coding
ENSG00000035687.9	ADSS	adenylosuccinate synthase	-0.0142951	0.81877	0.90607	protein_coding
ENSG00000035720.3	STAP1	signal transducing adaptor family member 1	NA	NA	NA	protein_coding
ENSG00000035862.8	TIMP2	TIMP metallopeptidase inhibitor 2	-0.56287	3.54e-14	5.1e-13	protein_coding
ENSG00000035928.10	RFC1	replication factor C subunit 1	-0.0197039	0.798395	0.894086	protein_coding
ENSG00000036054.8	TBC1D23	TBC1 domain family member 23	0.163539	0.048797	0.118135	protein_coding
ENSG00000036257.8	CUL3	cullin 3	0.00086982	0.990112	0.995603	protein_coding
ENSG00000036448.5	MYOM2	myomesin 2	-0.700613	0.0534244	0.127314	protein_coding
ENSG00000036473.5	OTC	ornithine carbamoyltransferase	NA	NA	NA	protein_coding
ENSG00000036530.4	CYP46A1	cytochrome P450 family 46 subfamily A member 1	-0.782561	0.00689163	0.0225331	protein_coding
ENSG00000036549.8	ZZZ3	zinc finger ZZ-type containing 3	0.193916	0.00115876	0.00461617	protein_coding
ENSG00000036565.10	SLC18A1	solute carrier family 18 member A1	0	1	NA	protein_coding
ENSG00000036672.11	USP2	ubiquitin specific peptidase 2	0.751105	0.00249481	0.00919255	protein_coding
ENSG00000036828.9	CASR	calcium sensing receptor	NA	NA	NA	protein_coding
ENSG00000037042.8	TUBG2	tubulin gamma 2	-0.119214	0.327521	0.515071	protein_coding
ENSG00000037241.3	RPL26L1	ribosomal protein L26 like 1	0.278846	0.0931365	0.199176	protein_coding
ENSG00000037280.11	FLT4	fms related tyrosine kinase 4	0.508763	0.105036	0.219135	protein_coding
ENSG00000037474.10	NSUN2	NOP2/Sun RNA methyltransferase family member 2	-0.038324	0.612883	0.770568	protein_coding
ENSG00000037637.6	FBXO42	F-box protein 42	-0.11019	0.185211	0.342315	protein_coding
ENSG00000037749.7	MFAP3	microfibrillar associated protein 3	-0.0917868	0.174195	0.326672	protein_coding
ENSG00000037757.9	MRI1	methylthioribose-1-phosphate isomerase 1	-0.01647	0.897712	0.948914	protein_coding
ENSG00000037897.12	METTL1	methyltransferase like 1	0.147864	0.243723	0.419443	protein_coding
ENSG00000037965.4	HOXC8	homeobox C8	0.68147	3.2e-05	0.000174807	protein_coding
ENSG00000038002.4	AGA	aspartylglucosaminidase	-0.225455	0.00736617	0.0238879	protein_coding
ENSG00000038210.9	PI4K2B	phosphatidylinositol 4-kinase type 2 beta	0.035137	0.695705	0.826691	protein_coding
ENSG00000038219.8	BOD1L1	biorientation of chromosomes in cell division 1 like 1	-0.105947	0.294469	0.477629	protein_coding
ENSG00000038274.11	MAT2B	methionine adenosyltransferase 2B	0.212173	0.1031	0.216311	protein_coding
ENSG00000038295.3	TLL1	tolloid like 1	1.45639	1.28e-10	1.38e-09	protein_coding
ENSG00000038358.10	EDC4	enhancer of mRNA decapping 4	0.0939862	0.300098	0.483872	protein_coding
ENSG00000038382.13	TRIO	trio Rho guanine nucleotide exchange factor	-0.0886506	0.439435	0.628089	protein_coding
ENSG00000038427.11	VCAN	versican	-0.330925	0.105726	0.220176	protein_coding
ENSG00000038532.10	CLEC16A	C-type lectin domain family 16 member A	-0.398291	0.000150118	0.000724651	protein_coding
ENSG00000038945.10	MSR1	macrophage scavenger receptor 1	-0.321433	0.277491	0.458597	protein_coding
ENSG00000039068.14	CDH1	cadherin 1	-0.687962	0.0437696	0.108121	protein_coding
ENSG00000039123.11	SKIV2L2	Ski2 like RNA helicase 2	0.0463138	0.540382	0.715107	protein_coding
ENSG00000039139.9	DNAH5	dynein axonemal heavy chain 5	-0.339466	0.0103318	0.0319852	protein_coding
ENSG00000039319.12	ZFYVE16	zinc finger FYVE-type containing 16	-0.0798712	0.274561	0.455302	protein_coding
ENSG00000039523.13	FAM65A	family with sequence similarity 65 member A	-0.200909	0.037941	0.0960989	protein_coding
ENSG00000039537.9	C6	complement C6	-0.38378	0.0893812	NA	protein_coding
ENSG00000039560.9	RAI14	retinoic acid induced 14	0.110566	0.131154	0.261961	protein_coding
ENSG00000039600.6	SOX30	SRY-box 30	-0.092161	0.799718	0.894545	protein_coding
ENSG00000039650.5	PNKP	polynucleotide kinase 3'-phosphatase	0.0103371	0.923588	0.962513	protein_coding
ENSG00000039987.2	BEST2	bestrophin 2	-0.0868067	0.394197	NA	protein_coding
ENSG00000040199.14	PHLPP2	PH domain and leucine rich repeat protein phosphatase 2	0.09534	0.23039	0.40202	protein_coding
ENSG00000040275.12	SPDL1	spindle apparatus coiled-coil protein 1	-2.10929	1.34e-104	3.76e-102	protein_coding
ENSG00000040341.13	STAU2	staufen double-stranded RNA binding protein 2	-0.22667	0.00237998	0.00881422	protein_coding
ENSG00000040487.8	PQLC2	PQ loop repeat containing 2	0.0632093	0.573598	0.741378	protein_coding
ENSG00000040531.10	CTNS	cystinosin, lysosomal cystine transporter	-0.203054	0.0723255	0.162882	protein_coding
ENSG00000040608.9	RTN4R	reticulon 4 receptor	0.623733	0.0240391	0.0655503	protein_coding
ENSG00000040633.8	PHF23	PHD finger protein 23	-0.126045	0.156118	0.299747	protein_coding
ENSG00000040731.6	CDH10	cadherin 10	-3.41405	9.2e-23	2.15e-21	protein_coding
ENSG00000040933.10	INPP4A	inositol polyphosphate-4-phosphatase type I A	-0.359532	5.58e-05	0.000291594	protein_coding
ENSG00000041353.5	RAB27B	RAB27B, member RAS oncogene family	-1.94779	5.33e-67	6.14e-65	protein_coding
ENSG00000041357.11	PSMA4	proteasome subunit alpha 4	0.197852	0.201453	0.364381	protein_coding
ENSG00000041515.11	MYO16	myosin XVI	-0.398086	0.124355	NA	protein_coding
ENSG00000041802.6	LSG1	large 60S subunit nuclear export GTPase 1	-0.364693	5.75e-06	3.54e-05	protein_coding
ENSG00000041880.10	PARP3	poly(ADP-ribose) polymerase family member 3	-0.161889	0.0741792	0.166254	protein_coding
ENSG00000041982.10	TNC	tenascin C	1.07786	2.52e-27	7.42e-26	protein_coding
ENSG00000041988.11	THAP3	THAP domain containing 3	-0.0196693	0.887863	0.943575	protein_coding
ENSG00000042062.7	FAM65C	family with sequence similarity 65 member C	1.69905	1.04e-07	8.17e-07	protein_coding
ENSG00000042088.9	TDP1	tyrosyl-DNA phosphodiesterase 1	-0.137323	0.144695	0.282749	protein_coding
ENSG00000042286.10	AIFM2	apoptosis inducing factor, mitochondria associated 2	0.398472	0.000679149	0.00285172	protein_coding
ENSG00000042304.6	C2orf83	chromosome 2 open reading frame 83	NA	NA	NA	protein_coding
ENSG00000042317.12	SPATA7	spermatogenesis associated 7	0.449217	0.000812526	0.00334718	protein_coding
ENSG00000042429.6	MED17	mediator complex subunit 17	-0.0797109	0.301648	0.485532	protein_coding
ENSG00000042445.9	RETSAT	retinol saturase	-0.118638	0.165496	0.313813	protein_coding
ENSG00000042493.11	CAPG	capping actin protein, gelsolin like	0.538201	2.33e-06	1.53e-05	protein_coding
ENSG00000042753.7	AP2S1	adaptor related protein complex 2 sigma 1 subunit	0.24901	0.000265954	0.00122035	protein_coding
ENSG00000042781.8	USH2A	usherin	0.309041	0.387663	0.577294	protein_coding
ENSG00000042813.3	ZPBP	zona pellucida binding protein	-0.112921	0.326314	NA	protein_coding
ENSG00000042832.7	TG	thyroglobulin	-1.0602	0.00138201	0.00540118	protein_coding
ENSG00000042980.8	ADAM28	ADAM metallopeptidase domain 28	0.627533	0.0771955	0.171795	protein_coding
ENSG00000043039.5	BARX2	BARX homeobox 2	NA	NA	NA	protein_coding
ENSG00000043093.9	DCUN1D1	defective in cullin neddylation 1 domain containing 1	0.0605678	0.48387	0.668022	protein_coding
ENSG00000043143.16	PHF15	NA	-0.500762	2.04e-09	1.95e-08	protein_coding
ENSG00000043355.6	ZIC2	Zic family member 2	0.10924	0.33918	NA	protein_coding
ENSG00000043462.7	LCP2	lymphocyte cytosolic protein 2	-0.108825	0.335768	NA	protein_coding
ENSG00000043514.11	TRIT1	tRNA isopentenyltransferase 1	0.146531	0.132297	0.263706	protein_coding
ENSG00000043591.4	ADRB1	adrenoceptor beta 1	0.469615	0.0532383	NA	protein_coding
ENSG00000044012.3	GUCA2B	guanylate cyclase activator 2B	-0.112921	0.326314	NA	protein_coding
ENSG00000044090.4	CUL7	cullin 7	-0.0134969	0.871966	0.935043	protein_coding
ENSG00000044115.15	CTNNA1	catenin alpha 1	-0.101222	0.249724	0.426435	protein_coding
ENSG00000044446.6	PHKA2	phosphorylase kinase regulatory subunit alpha 2	0.273101	0.0107475	0.0331357	protein_coding
ENSG00000044459.10	CNTLN	centlein	0.603094	1.54e-12	1.94e-11	protein_coding
ENSG00000044524.6	EPHA3	EPH receptor A3	-0.935617	0.00603545	0.0200438	protein_coding
ENSG00000044574.7	HSPA5	heat shock protein family A (Hsp70) member 5	0.287149	2.74e-05	0.000150756	protein_coding
ENSG00000046604.8	DSG2	desmoglein 2	-0.0396485	0.741959	NA	protein_coding
ENSG00000046647.9	GEMIN8	gem nuclear organelle associated protein 8	0.185876	0.0979529	0.207497	protein_coding
ENSG00000046651.10	OFD1	OFD1, centriole and centriolar satellite protein	0.217167	0.0214038	0.0595246	protein_coding
ENSG00000046653.10	GPM6B	glycoprotein M6B	3.12288	6.99e-25	1.84e-23	protein_coding
ENSG00000046774.9	MAGEC2	MAGE family member C2	NA	NA	NA	protein_coding
ENSG00000046889.14	PREX2	phosphatidylinositol-3,4,5-trisphosphate dependent Rac exchange factor 2	-3.30421	1.04e-121	3.98e-119	protein_coding
ENSG00000047056.10	WDR37	WD repeat domain 37	-0.352435	1.8e-05	0.00010221	protein_coding
ENSG00000047188.11	YTHDC2	YTH domain containing 2	-0.0741357	0.324144	0.510967	protein_coding
ENSG00000047230.10	CTPS2	CTP synthase 2	-0.316853	0.00175729	0.00669679	protein_coding
ENSG00000047249.12	ATP6V1H	ATPase H+ transporting V1 subunit H	-0.63912	1.71e-14	2.51e-13	protein_coding
ENSG00000047315.10	POLR2B	RNA polymerase II subunit B	-0.0825001	0.248203	0.42445	protein_coding
ENSG00000047346.8	FAM214A	family with sequence similarity 214 member A	-0.939716	6.01e-49	4.15e-47	protein_coding
ENSG00000047365.7	ARAP2	ArfGAP with RhoGAP domain, ankyrin repeat and PH domain 2	-0.596844	0.0449368	0.110405	protein_coding
ENSG00000047410.8	TPR	translocated promoter region, nuclear basket protein	0.0666036	0.457232	0.643833	protein_coding
ENSG00000047457.9	CP	ceruloplasmin	-0.0830391	0.783497	0.884822	protein_coding
ENSG00000047578.8	KIAA0556	KIAA0556	-0.375866	8.74e-05	0.000440239	protein_coding
ENSG00000047579.15	DTNBP1	dystrobrevin binding protein 1	0.155151	0.19666	0.357636	protein_coding
ENSG00000047597.5	XK	X-linked Kx blood group	0	1	NA	protein_coding
ENSG00000047617.10	ANO2	anoctamin 2	-0.0187529	0.956569	0.978437	protein_coding
ENSG00000047621.7	C12orf4	chromosome 12 open reading frame 4	-0.11636	0.140594	0.276473	protein_coding
ENSG00000047634.10	SCML1	sex comb on midleg-like 1 (Drosophila)	0.870539	1.39e-07	1.08e-06	protein_coding
ENSG00000047644.13	WWC3	WWC family member 3	0.216788	0.0339376	0.0877405	protein_coding
ENSG00000047648.17	ARHGAP6	Rho GTPase activating protein 6	0.838741	8.16e-06	4.91e-05	protein_coding
ENSG00000047662.4	FAM184B	family with sequence similarity 184 member B	-0.917738	0.006401	0.0210826	protein_coding
ENSG00000047849.17	MAP4	microtubule associated protein 4	-0.110873	0.154475	0.297145	protein_coding
ENSG00000047932.9	GOPC	golgi associated PDZ and coiled-coil motif containing	-0.179832	0.000269906	0.00123645	protein_coding
ENSG00000047936.6	ROS1	ROS proto-oncogene 1, receptor tyrosine kinase	-0.441394	0.119793	0.243515	protein_coding
ENSG00000048028.7	USP28	ubiquitin specific peptidase 28	0.58633	6.43e-12	7.67e-11	protein_coding
ENSG00000048052.16	HDAC9	histone deacetylase 9	-0.892782	2.06e-19	4.08e-18	protein_coding
ENSG00000048140.13	TSPAN17	tetraspanin 17	0.0942811	0.233524	0.406086	protein_coding
ENSG00000048162.15	NOP16	NOP16 nucleolar protein	-0.0159435	0.883607	0.941233	protein_coding
ENSG00000048342.11	CC2D2A	coiled-coil and C2 domain containing 2A	1.0636	1.84e-25	4.97e-24	protein_coding
ENSG00000048392.7	RRM2B	ribonucleotide reductase regulatory TP53 inducible subunit M2B	-0.87639	4.13e-26	1.15e-24	protein_coding
ENSG00000048405.5	ZNF800	zinc finger protein 800	-0.135184	0.0544031	0.129253	protein_coding
ENSG00000048462.6	TNFRSF17	TNF receptor superfamily member 17	0.0185701	0.917886	NA	protein_coding
ENSG00000048471.9	SNX29	sorting nexin 29	0.199193	0.0325278	0.0847559	protein_coding
ENSG00000048540.10	LMO3	LIM domain only 3	NA	NA	NA	protein_coding
ENSG00000048544.5	MRPS10	mitochondrial ribosomal protein S10	-0.113057	0.178232	0.332491	protein_coding
ENSG00000048545.9	GUCA1A	guanylate cyclase activator 1A	1.53286	2.37e-05	0.000132185	protein_coding
ENSG00000048649.9	RSF1	remodeling and spacing factor 1	-0.298361	0.00501765	0.0170748	protein_coding
ENSG00000048707.9	VPS13D	vacuolar protein sorting 13 homolog D	-0.219803	0.114769	0.235339	protein_coding
ENSG00000048740.12	CELF2	CUGBP, Elav-like family member 2	0.792726	7.55e-14	1.06e-12	protein_coding
ENSG00000048828.12	FAM120A	family with sequence similarity 120A	0.191448	0.0117705	0.0358776	protein_coding
ENSG00000048991.12	R3HDM1	R3H domain containing 1	0.0931174	0.185923	0.343242	protein_coding
ENSG00000049089.9	COL9A2	collagen type IX alpha 2 chain	0.908134	0.0109783	0.033752	protein_coding
ENSG00000049130.9	KITLG	KIT ligand	0.0694934	0.376565	0.565925	protein_coding
ENSG00000049167.9	ERCC8	ERCC excision repair 8, CSA ubiquitin ligase complex subunit	-0.0133185	0.914356	0.958195	protein_coding
ENSG00000049192.10	ADAMTS6	ADAM metallopeptidase with thrombospondin type 1 motif 6	0.253686	0.302699	0.486705	protein_coding
ENSG00000049239.8	H6PD	hexose-6-phosphate dehydrogenase/glucose 1-dehydrogenase	-0.0442179	0.635378	0.786104	protein_coding
ENSG00000049245.8	VAMP3	vesicle associated membrane protein 3	-0.24912	3.68e-05	0.000199	protein_coding
ENSG00000049246.10	PER3	period circadian clock 3	0.0208758	0.859967	0.928499	protein_coding
ENSG00000049247.9	UTS2	urotensin 2	-0.130103	0.289755	NA	protein_coding
ENSG00000049249.4	TNFRSF9	TNF receptor superfamily member 9	NA	NA	NA	protein_coding
ENSG00000049283.13	EPN3	epsin 3	-0.112921	0.326314	NA	protein_coding
ENSG00000049323.11	LTBP1	latent transforming growth factor beta binding protein 1	0.192795	0.0637332	0.147153	protein_coding
ENSG00000049449.4	RCN1	reticulocalbin 1	0.209231	0.00161173	0.00619717	protein_coding
ENSG00000049540.12	ELN	elastin	-0.954497	4.44e-15	6.81e-14	protein_coding
ENSG00000049541.6	RFC2	replication factor C subunit 2	0.388632	0.0101849	0.0316003	protein_coding
ENSG00000049618.16	ARID1B	AT-rich interaction domain 1B	0.038254	0.69293	0.825195	protein_coding
ENSG00000049656.9	CLPTM1L	CLPTM1 like	-0.515093	9.37e-11	1.02e-09	protein_coding
ENSG00000049759.12	NEDD4L	neural precursor cell expressed, developmentally down-regulated 4-like, E3 ubiquitin protein ligase	-0.470254	1.21e-05	7.07e-05	protein_coding
ENSG00000049768.10	FOXP3	forkhead box P3	-0.147899	0.628214	0.781437	protein_coding
ENSG00000049769.8	PPP1R3F	protein phosphatase 1 regulatory subunit 3F	-0.676898	0.00240369	0.00889192	protein_coding
ENSG00000049860.9	HEXB	hexosaminidase subunit beta	-0.801677	1.76e-27	5.21e-26	protein_coding
ENSG00000049883.10	PTCD2	pentatricopeptide repeat domain 2	-0.13415	0.27556	0.456485	protein_coding
ENSG00000050030.8	KIAA2022	KIAA2022	-0.0246534	0.928544	0.963678	protein_coding
ENSG00000050130.13	JKAMP	JNK1/MAPK8-associated membrane protein	-0.239809	0.0969729	0.205756	protein_coding
ENSG00000050165.13	DKK3	dickkopf WNT signaling pathway inhibitor 3	-1.17455	1.38e-49	9.7e-48	protein_coding
ENSG00000050327.10	ARHGEF5	Rho guanine nucleotide exchange factor 5	0.549035	2.36e-05	0.000131471	protein_coding
ENSG00000050344.8	NFE2L3	nuclear factor, erythroid 2 like 3	2.54079	2.29e-64	2.32e-62	protein_coding
ENSG00000050393.7	MCUR1	mitochondrial calcium uniporter regulator 1	-0.195711	0.00850274	0.0269926	protein_coding
ENSG00000050405.9	LIMA1	LIM domain and actin binding 1	0.803937	1.36e-28	4.25e-27	protein_coding
ENSG00000050426.11	LETMD1	LETM1 domain containing 1	-0.138021	0.151025	0.292231	protein_coding
ENSG00000050438.12	SLC4A8	solute carrier family 4 member 8	-1.17638	9e-30	2.96e-28	protein_coding
ENSG00000050555.13	LAMC3	laminin subunit gamma 3	-0.539384	0.0820895	0.180249	protein_coding
ENSG00000050628.16	PTGER3	prostaglandin E receptor 3	-0.354855	0.0216343	0.0600634	protein_coding
ENSG00000050730.11	TNIP3	TNFAIP3 interacting protein 3	0.0544418	0.877422	0.938032	protein_coding
ENSG00000050748.12	MAPK9	mitogen-activated protein kinase 9	-0.143564	0.0630068	0.14582	protein_coding
ENSG00000050767.11	COL23A1	collagen type XXIII alpha 1 chain	-0.17935	0.302882	NA	protein_coding
ENSG00000050820.12	BCAR1	BCAR1, Cas family scaffolding protein	0.346546	7.65e-05	0.000389403	protein_coding
ENSG00000051009.6	FAM160A2	family with sequence similarity 160 member A2	0.0271878	0.839942	0.918564	protein_coding
ENSG00000051108.10	HERPUD1	homocysteine inducible ER protein with ubiquitin like domain 1	0.144627	0.0231203	0.0635008	protein_coding
ENSG00000051128.14	HOMER3	homer scaffolding protein 3	0.215886	0.0370727	0.094302	protein_coding
ENSG00000051180.12	RAD51	RAD51 recombinase	0.572005	0.00146568	0.0056907	protein_coding
ENSG00000051341.9	POLQ	DNA polymerase theta	1.60027	6.62e-16	1.06e-14	protein_coding
ENSG00000051382.4	PIK3CB	phosphatidylinositol-4,5-bisphosphate 3-kinase catalytic subunit beta	0.124301	0.168137	0.317868	protein_coding
ENSG00000051523.6	CYBA	cytochrome b-245 alpha chain	-0.356546	0.00057627	0.00245554	protein_coding
ENSG00000051596.5	THOC3	THO complex 3	-0.230131	0.0443016	0.10916	protein_coding
ENSG00000051620.6	HEBP2	heme binding protein 2	0.325161	2.36e-06	1.54e-05	protein_coding
ENSG00000051825.10	MPHOSPH9	M-phase phosphoprotein 9	0.214801	0.0141532	0.0419011	protein_coding
ENSG00000052126.10	PLEKHA5	pleckstrin homology domain containing A5	0.353035	2.19e-05	0.000122756	protein_coding
ENSG00000052344.11	PRSS8	protease, serine 8	NA	NA	NA	protein_coding
ENSG00000052723.7	SIKE1	suppressor of IKBKE 1	0.251878	0.000559235	0.0023918	protein_coding
ENSG00000052749.9	RRP12	ribosomal RNA processing 12 homolog	-0.498877	5e-06	3.11e-05	protein_coding
ENSG00000052795.8	FNIP2	folliculin interacting protein 2	-0.336157	4.8e-05	0.000254472	protein_coding
ENSG00000052802.8	MSMO1	methylsterol monooxygenase 1	-0.677786	1.36e-06	9.23e-06	protein_coding
ENSG00000052841.10	TTC17	tetratricopeptide repeat domain 17	0.0113303	0.855881	0.926545	protein_coding
ENSG00000052850.5	ALX4	ALX homeobox 4	2.84697	1.33e-66	1.51e-64	protein_coding
ENSG00000053108.12	FSTL4	follistatin like 4	-0.176931	0.213524	NA	protein_coding
ENSG00000053254.11	FOXN3	forkhead box N3	0.256006	0.0133837	0.0399798	protein_coding
ENSG00000053328.8	METTL24	methyltransferase like 24	-0.824781	0.000703909	0.00294632	protein_coding
ENSG00000053371.8	AKR7A2	aldo-keto reductase family 7 member A2	0.190961	0.0395753	0.0994792	protein_coding
ENSG00000053372.4	MRTO4	MRT4 homolog, ribosome maturation factor	0.0674049	0.419069	0.608605	protein_coding
ENSG00000053438.7	NNAT	neuronatin	-0.112921	0.326314	NA	protein_coding
ENSG00000053501.8	USE1	unconventional SNARE in the ER 1	0.0726202	0.564203	0.734118	protein_coding
ENSG00000053524.7	MCF2L2	MCF.2 cell line derived transforming sequence-like 2	-0.408175	0.248185	0.42445	protein_coding
ENSG00000053702.10	NRIP2	nuclear receptor interacting protein 2	-0.0868067	0.394197	NA	protein_coding
ENSG00000053747.11	LAMA3	laminin subunit alpha 3	-0.48344	3.62e-05	0.000196426	protein_coding
ENSG00000053770.7	AP5M1	adaptor related protein complex 5 mu 1 subunit	-0.466451	2.45e-12	3.04e-11	protein_coding
ENSG00000053900.6	ANAPC4	anaphase promoting complex subunit 4	0.0285677	0.800315	0.894803	protein_coding
ENSG00000053918.11	KCNQ1	potassium voltage-gated channel subfamily Q member 1	0.0707945	0.681285	NA	protein_coding
ENSG00000054116.7	TRAPPC3	trafficking protein particle complex 3	-0.0753197	0.322012	0.508613	protein_coding
ENSG00000054118.9	THRAP3	thyroid hormone receptor associated protein 3	0.165791	0.0383214	0.0968745	protein_coding
ENSG00000054148.13	PHPT1	phosphohistidine phosphatase 1	-0.127611	0.113896	0.233981	protein_coding
ENSG00000054179.7	ENTPD2	ectonucleoside triphosphate diphosphohydrolase 2	0.0743017	0.576851	NA	protein_coding
ENSG00000054219.9	LY75	lymphocyte antigen 75	2.31247	4.62e-14	6.6e-13	protein_coding
ENSG00000054267.16	ARID4B	AT-rich interaction domain 4B	-0.113205	0.0763489	0.170201	protein_coding
ENSG00000054277.8	OPN3	opsin 3	-0.928568	2.82e-29	9.14e-28	protein_coding
ENSG00000054282.11	SDCCAG8	serologically defined colon cancer antigen 8	-0.444098	3.47e-08	2.91e-07	protein_coding
ENSG00000054356.9	PTPRN	protein tyrosine phosphatase, receptor type N	1.57458	7.43e-30	2.46e-28	protein_coding
ENSG00000054392.8	HHAT	hedgehog acyltransferase	0.0391413	0.734128	0.854475	protein_coding
ENSG00000054523.12	KIF1B	kinesin family member 1B	0.0406188	0.686053	0.821301	protein_coding
ENSG00000054598.5	FOXC1	forkhead box C1	0.688868	2.15e-19	4.24e-18	protein_coding
ENSG00000054611.9	TBC1D22A	TBC1 domain family member 22A	-0.0407633	0.652362	0.797993	protein_coding
ENSG00000054654.11	SYNE2	spectrin repeat containing nuclear envelope protein 2	1.07122	0.000352553	0.00157527	protein_coding
ENSG00000054690.9	PLEKHH1	pleckstrin homology, MyTH4 and FERM domain containing H1	-0.340956	0.308076	0.493002	protein_coding
ENSG00000054793.9	ATP9A	ATPase phospholipid transporting 9A (putative)	-0.20139	0.0364849	0.0930849	protein_coding
ENSG00000054796.8	SPO11	SPO11, initiator of meiotic double stranded breaks	NA	NA	NA	protein_coding
ENSG00000054803.3	CBLN4	cerebellin 4 precursor	-0.112921	0.326314	NA	protein_coding
ENSG00000054938.11	CHRDL2	chordin like 2	0.327598	0.299058	0.482728	protein_coding
ENSG00000054965.6	FAM168A	family with sequence similarity 168 member A	-0.188377	0.0209437	0.0584776	protein_coding
ENSG00000054967.8	RELT	RELT tumor necrosis factor receptor	-0.358298	0.0334332	0.086562	protein_coding
ENSG00000054983.12	GALC	galactosylceramidase	-0.240039	0.00119887	0.0047547	protein_coding
ENSG00000055044.6	NOP58	NOP58 ribonucleoprotein	0.123376	0.0803262	0.177312	protein_coding
ENSG00000055070.12	SZRD1	SUZ RNA binding domain containing 1	0.178819	0.0166207	0.0481082	protein_coding
ENSG00000055118.10	KCNH2	potassium voltage-gated channel subfamily H member 2	0.229031	0.36793	NA	protein_coding
ENSG00000055130.11	CUL1	cullin 1	0.0840549	0.266591	0.446042	protein_coding
ENSG00000055147.13	FAM114A2	family with sequence similarity 114 member A2	-0.112623	0.179882	0.334804	protein_coding
ENSG00000055163.14	CYFIP2	cytoplasmic FMR1 interacting protein 2	-0.101566	0.348233	0.536673	protein_coding
ENSG00000055208.13	TAB2	TGF-beta activated kinase 1/MAP3K7 binding protein 2	0.0977362	0.148973	0.289348	protein_coding
ENSG00000055211.8	GINM1	glycoprotein integral membrane 1	-0.763319	5.86e-30	1.94e-28	protein_coding
ENSG00000055332.11	EIF2AK2	eukaryotic translation initiation factor 2 alpha kinase 2	-0.239668	0.00988406	0.0307546	protein_coding
ENSG00000055483.14	USP36	ubiquitin specific peptidase 36	-0.157084	0.0427676	0.106058	protein_coding
ENSG00000055609.13	KMT2C	lysine methyltransferase 2C	-0.278336	0.17154	0.322868	protein_coding
ENSG00000055732.8	MCOLN3	mucolipin 3	-0.953267	0.00763592	0.0246362	protein_coding
ENSG00000055813.5	CCDC85A	coiled-coil domain containing 85A	-1.54577	2.35e-20	4.88e-19	protein_coding
ENSG00000055917.11	PUM2	pumilio RNA binding family member 2	-0.210371	0.00866539	0.0274157	protein_coding
ENSG00000055950.12	MRPL43	mitochondrial ribosomal protein L43	-0.110318	0.255747	0.43364	protein_coding
ENSG00000055955.11	ITIH4	inter-alpha-trypsin inhibitor heavy chain family member 4	0.133997	0.654366	0.799645	protein_coding
ENSG00000055957.6	ITIH1	inter-alpha-trypsin inhibitor heavy chain 1	NA	NA	NA	protein_coding
ENSG00000056050.6	C4orf27	NA	0.302526	0.00164979	0.00632898	protein_coding
ENSG00000056097.11	ZFR	zinc finger RNA binding protein	-0.288146	1.29e-06	8.79e-06	protein_coding
ENSG00000056277.11	ZNF280C	zinc finger protein 280C	-0.0296561	0.770377	0.876596	protein_coding
ENSG00000056291.13	NPFFR2	neuropeptide FF receptor 2	NA	NA	NA	protein_coding
ENSG00000056487.11	PHF21B	PHD finger protein 21B	NA	NA	NA	protein_coding
ENSG00000056558.6	TRAF1	TNF receptor associated factor 1	0.334456	0.0861691	0.18713	protein_coding
ENSG00000056586.11	RC3H2	ring finger and CCCH-type domains 2	0.0174046	0.865618	0.931392	protein_coding
ENSG00000056661.9	PCGF2	polycomb group ring finger 2	0.308816	0.000361759	0.00161221	protein_coding
ENSG00000056736.5	IL17RB	interleukin 17 receptor B	0.605328	0.0948384	0.202278	protein_coding
ENSG00000056972.14	TRAF3IP2	TRAF3 interacting protein 2	0.590208	3.99e-11	4.48e-10	protein_coding
ENSG00000056998.14	GYG2	glycogenin 2	0.300853	0.00934894	0.0292709	protein_coding
ENSG00000057019.11	DCBLD2	discoidin, CUB and LCCL domain containing 2	-1.23824	2.76e-57	2.38e-55	protein_coding
ENSG00000057149.10	SERPINB3	serpin family B member 3	0.0741762	0.582643	NA	protein_coding
ENSG00000057252.8	SOAT1	sterol O-acyltransferase 1	-0.00268982	0.968285	0.983908	protein_coding
ENSG00000057294.9	PKP2	plakophilin 2	0.368428	0.310859	0.496217	protein_coding
ENSG00000057468.6	MSH4	mutS homolog 4	0.381038	0.2373	0.411337	protein_coding
ENSG00000057593.9	F7	coagulation factor VII	0.767588	0.0112163	0.034365	protein_coding
ENSG00000057608.11	GDI2	GDP dissociation inhibitor 2	0.226653	0.000336855	0.00151237	protein_coding
ENSG00000057657.10	PRDM1	PR/SET domain 1	-1.06047	3.61e-35	1.53e-33	protein_coding
ENSG00000057663.8	ATG5	autophagy related 5	-0.0112853	0.905441	0.952766	protein_coding
ENSG00000057704.6	TMCC3	transmembrane and coiled-coil domain family 3	0.376574	0.0612516	NA	protein_coding
ENSG00000057757.5	PITHD1	PITH domain containing 1	-0.444163	6.87e-06	4.19e-05	protein_coding
ENSG00000057935.9	MTA3	metastasis associated 1 family member 3	0.187556	0.0203694	0.0570856	protein_coding
ENSG00000058056.4	USP13	ubiquitin specific peptidase 13 (isopeptidase T-3)	-0.114608	0.267558	0.447124	protein_coding
ENSG00000058063.11	ATP11B	ATPase phospholipid transporting 11B (putative)	0.242	0.00111817	0.00447268	protein_coding
ENSG00000058085.10	LAMC2	laminin subunit gamma 2	-1.04862	1.08e-09	1.06e-08	protein_coding
ENSG00000058091.12	CDK14	cyclin dependent kinase 14	0.0132395	0.863174	0.930193	protein_coding
ENSG00000058262.5	SEC61A1	Sec61 translocon alpha 1 subunit	-0.0390894	0.58698	0.750506	protein_coding
ENSG00000058272.11	PPP1R12A	protein phosphatase 1 regulatory subunit 12A	-0.172792	0.00606762	0.020137	protein_coding
ENSG00000058335.11	RASGRF1	Ras protein specific guanine nucleotide releasing factor 1	1.0005	0.00317176	0.0113578	protein_coding
ENSG00000058404.15	CAMK2B	calcium/calmodulin dependent protein kinase II beta	-0.696531	0.0417308	0.104003	protein_coding
ENSG00000058453.12	CROCC	ciliary rootlet coiled-coil, rootletin	0.530678	6.7e-06	4.09e-05	protein_coding
ENSG00000058600.11	POLR3E	RNA polymerase III subunit E	-0.0779573	0.339399	0.527448	protein_coding
ENSG00000058668.10	ATP2B4	ATPase plasma membrane Ca2+ transporting 4	-0.423781	2.55e-05	0.000141063	protein_coding
ENSG00000058673.11	ZC3H11A	zinc finger CCCH-type containing 11A	-0.0109551	0.924093	0.962697	protein_coding
ENSG00000058729.6	RIOK2	RIO kinase 2	-0.0239124	0.751717	0.865322	protein_coding
ENSG00000058799.9	YIPF1	Yip1 domain family member 1	0.0315043	0.72251	0.845916	protein_coding
ENSG00000058804.10	NDC1	NDC1 transmembrane nucleoporin	0.282131	0.00210477	0.00788895	protein_coding
ENSG00000058866.10	DGKG	diacylglycerol kinase gamma	-0.0912507	0.38014	NA	protein_coding
ENSG00000059122.12	FLYWCH1	FLYWCH-type zinc finger 1	-0.421636	3.29e-05	0.000179573	protein_coding
ENSG00000059145.14	UNKL	unkempt family like zinc finger	-0.216708	0.0269892	0.0723257	protein_coding
ENSG00000059377.11	TBXAS1	thromboxane A synthase 1	-0.0566742	0.831163	NA	protein_coding
ENSG00000059378.8	PARP12	poly(ADP-ribose) polymerase family member 12	0.281073	0.00472847	0.0161921	protein_coding
ENSG00000059573.4	ALDH18A1	aldehyde dehydrogenase 18 family member A1	-0.0669811	0.36509	0.554187	protein_coding
ENSG00000059588.5	TARBP1	TAR (HIV-1) RNA binding protein 1	0.534994	3.71e-06	2.35e-05	protein_coding
ENSG00000059691.7	PET112	NA	0.317542	0.00118418	0.00470117	protein_coding
ENSG00000059728.6	MXD1	MAX dimerization protein 1	-0.565544	9.39e-09	8.41e-08	protein_coding
ENSG00000059758.3	CDK17	cyclin dependent kinase 17	0.161554	0.0346703	0.0892655	protein_coding
ENSG00000059769.15	DNAJC25	DnaJ heat shock protein family (Hsp40) member C25	0.00888025	0.940533	0.970589	protein_coding
ENSG00000059804.11	SLC2A3	solute carrier family 2 member 3	0.105544	0.217602	0.385379	protein_coding
ENSG00000059915.12	PSD	pleckstrin and Sec7 domain containing	1.49282	8.7e-08	6.9e-07	protein_coding
ENSG00000060069.12	CTDP1	CTD phosphatase subunit 1	-0.0767529	0.471532	0.657264	protein_coding
ENSG00000060138.8	YBX3	Y-box binding protein 3	0.149121	0.0146836	0.0432166	protein_coding
ENSG00000060140.4	STYK1	serine/threonine/tyrosine kinase 1	-1.46313	2.43e-11	2.77e-10	protein_coding
ENSG00000060237.12	WNK1	WNK lysine deficient protein kinase 1	-0.632774	1.68e-06	1.13e-05	protein_coding
ENSG00000060339.9	CCAR1	cell division cycle and apoptosis regulator 1	-0.0172479	0.777187	0.881169	protein_coding
ENSG00000060491.11	OGFR	opioid growth factor receptor	0.0319719	0.689537	0.823493	protein_coding
ENSG00000060558.3	GNA15	G protein subunit alpha 15	-0.0698094	0.784863	NA	protein_coding
ENSG00000060566.9	CREB3L3	cAMP responsive element binding protein 3 like 3	NA	NA	NA	protein_coding
ENSG00000060642.6	PIGV	phosphatidylinositol glycan anchor biosynthesis class V	-0.161611	0.139277	0.27448	protein_coding
ENSG00000060656.15	PTPRU	protein tyrosine phosphatase, receptor type U	0.559601	2.26e-06	1.48e-05	protein_coding
ENSG00000060688.8	SNRNP40	small nuclear ribonucleoprotein U5 subunit 40	-0.0901565	0.294075	0.477266	protein_coding
ENSG00000060709.9	RIMBP2	RIMS binding protein 2	0.0274187	0.901963	NA	protein_coding
ENSG00000060718.14	COL11A1	collagen type XI alpha 1 chain	-0.0385494	0.583058	0.747671	protein_coding
ENSG00000060749.10	QSER1	glutamine and serine rich 1	-0.0215502	0.856836	0.926831	protein_coding
ENSG00000060762.14	MPC1	mitochondrial pyruvate carrier 1	0.0168522	0.894225	0.946874	protein_coding
ENSG00000060971.13	ACAA1	acetyl-CoA acyltransferase 1	-0.264129	0.00268086	0.00979696	protein_coding
ENSG00000060982.10	BCAT1	branched chain amino acid transaminase 1	0.723229	1.17e-17	2.08e-16	protein_coding
ENSG00000061273.13	HDAC7	histone deacetylase 7	0.313504	0.000348478	0.00155813	protein_coding
ENSG00000061337.11	LZTS1	leucine zipper tumor suppressor 1	2.44444	1.49e-96	3.69e-94	protein_coding
ENSG00000061455.9	PRDM6	PR/SET domain 6	-0.485016	0.144586	0.282683	protein_coding
ENSG00000061492.7	WNT8A	Wnt family member 8A	-0.122003	0.306402	NA	protein_coding
ENSG00000061656.5	SPAG4	sperm associated antigen 4	-0.203562	0.3712	0.560441	protein_coding
ENSG00000061676.9	NCKAP1	NCK associated protein 1	-0.284253	3.33e-05	0.000181031	protein_coding
ENSG00000061794.8	MRPS35	mitochondrial ribosomal protein S35	0.19701	0.0147883	0.0434855	protein_coding
ENSG00000061918.8	GUCY1B3	guanylate cyclase 1 soluble subunit beta	-0.927215	5.43e-11	6.01e-10	protein_coding
ENSG00000061936.5	SFSWAP	splicing factor SWAP homolog	0.321251	0.00610304	0.0202339	protein_coding
ENSG00000061938.12	TNK2	tyrosine kinase non receptor 2	-0.283562	0.000479638	0.00207769	protein_coding
ENSG00000061987.10	MON2	MON2 homolog, regulator of endosome-to-Golgi trafficking	-0.0316977	0.591558	0.754486	protein_coding
ENSG00000062038.9	CDH3	cadherin 3	0.988279	0.00417554	0.0145169	protein_coding
ENSG00000062096.10	ARSF	arylsulfatase F	-0.17685	0.213597	NA	protein_coding
ENSG00000062194.11	GPBP1	GC-rich promoter binding protein 1	-0.012213	0.86294	0.930156	protein_coding
ENSG00000062282.10	DGAT2	diacylglycerol O-acyltransferase 2	-0.271358	0.35259	0.541323	protein_coding
ENSG00000062370.12	ZNF112	zinc finger protein 112	0.137911	0.228451	0.399311	protein_coding
ENSG00000062485.14	CS	citrate synthase	0.112701	0.122212	0.247456	protein_coding
ENSG00000062524.11	LTK	leukocyte receptor tyrosine kinase	-1.84933	2.27e-10	2.38e-09	protein_coding
ENSG00000062582.9	MRPS24	mitochondrial ribosomal protein S24	-0.106301	0.607288	0.76613	protein_coding
ENSG00000062598.13	ELMO2	engulfment and cell motility 2	-0.170729	0.0263585	0.0708995	protein_coding
ENSG00000062650.13	WAPAL	NA	0.0393443	0.66454	0.806889	protein_coding
ENSG00000062716.6	VMP1	vacuole membrane protein 1	-0.00351433	0.991917	0.99619	protein_coding
ENSG00000062725.5	APPBP2	amyloid beta precursor protein binding protein 2	0.136285	0.0452911	0.111095	protein_coding
ENSG00000062822.8	POLD1	DNA polymerase delta 1, catalytic subunit	0.815699	4.91e-07	3.56e-06	protein_coding
ENSG00000063015.15	SEZ6	seizure related 6 homolog	-0.213081	0.406003	NA	protein_coding
ENSG00000063046.13	EIF4B	eukaryotic translation initiation factor 4B	0.277037	0.00013203	0.000643525	protein_coding
ENSG00000063127.11	SLC6A16	solute carrier family 6 member 16	-0.143909	0.547318	0.720632	protein_coding
ENSG00000063169.6	GLTSCR1	glioma tumor suppressor candidate region gene 1	0.244014	0.0122192	0.0369861	protein_coding
ENSG00000063176.11	SPHK2	sphingosine kinase 2	-0.199434	0.0897638	0.193371	protein_coding
ENSG00000063177.8	RPL18	ribosomal protein L18	0.405634	1.47e-10	1.57e-09	protein_coding
ENSG00000063180.4	CA11	carbonic anhydrase 11	0.0249946	0.899756	0.949816	protein_coding
ENSG00000063241.3	ISOC2	isochorismatase domain containing 2	-0.0199921	0.839063	0.918036	protein_coding
ENSG00000063244.8	U2AF2	U2 small nuclear RNA auxiliary factor 2	0.0952622	0.236294	0.410052	protein_coding
ENSG00000063245.10	EPN1	epsin 1	0.236296	0.0218059	0.0604881	protein_coding
ENSG00000063322.9	MED29	mediator complex subunit 29	0.0282855	0.74286	0.859465	protein_coding
ENSG00000063438.12	AHRR	aryl-hydrocarbon receptor repressor	-0.101813	0.188112	0.34598	protein_coding
ENSG00000063515.2	GSC2	goosecoid homeobox 2	NA	NA	NA	protein_coding
ENSG00000063587.11	ZNF275	zinc finger protein 275	-0.00272343	0.985575	0.993158	protein_coding
ENSG00000063601.12	MTMR1	myotubularin related protein 1	0.575091	5.99e-13	7.81e-12	protein_coding
ENSG00000063660.4	GPC1	glypican 1	-0.772924	8.06e-15	1.22e-13	protein_coding
ENSG00000063761.11	ADCK1	aarF domain containing kinase 1	-0.149008	0.281118	0.46279	protein_coding
ENSG00000063854.8	HAGH	hydroxyacylglutathione hydrolase	-0.710322	5.21e-12	6.3e-11	protein_coding
ENSG00000063978.11	RNF4	ring finger protein 4	-0.0473366	0.57204	0.740196	protein_coding
ENSG00000064012.17	CASP8	caspase 8	0.332001	0.00113443	0.00453126	protein_coding
ENSG00000064042.13	LIMCH1	LIM and calponin homology domains 1	-0.195825	0.0365844	0.0932901	protein_coding
ENSG00000064102.10	ASUN	NA	-0.11509	0.106588	0.221572	protein_coding
ENSG00000064115.6	TM7SF3	transmembrane 7 superfamily member 3	-0.658748	1.23e-16	2.05e-15	protein_coding
ENSG00000064195.7	DLX3	distal-less homeobox 3	-1.06981	0.00318518	0.0113954	protein_coding
ENSG00000064199.2	SPA17	sperm autoantigenic protein 17	0.0789714	0.520076	0.698619	protein_coding
ENSG00000064201.11	TSPAN32	tetraspanin 32	0.143287	0.519697	NA	protein_coding
ENSG00000064205.6	WISP2	WNT1 inducible signaling pathway protein 2	0.284603	0.211743	0.377907	protein_coding
ENSG00000064218.4	DMRT3	doublesex and mab-3 related transcription factor 3	-0.112921	0.326314	NA	protein_coding
ENSG00000064225.8	ST3GAL6	ST3 beta-galactoside alpha-2,3-sialyltransferase 6	-3.05518	6.83e-19	1.31e-17	protein_coding
ENSG00000064270.8	ATP2C2	ATPase secretory pathway Ca2+ transporting 2	-0.0298907	0.854136	NA	protein_coding
ENSG00000064300.4	NGFR	nerve growth factor receptor	-0.0429991	0.889996	0.944434	protein_coding
ENSG00000064309.10	CDON	cell adhesion associated, oncogene regulated	0.464839	0.00147026	0.0057051	protein_coding
ENSG00000064313.7	TAF2	TATA-box binding protein associated factor 2	0.175997	0.0150262	0.044066	protein_coding
ENSG00000064393.11	HIPK2	homeodomain interacting protein kinase 2	-0.920005	6.05e-12	7.24e-11	protein_coding
ENSG00000064419.9	TNPO3	transportin 3	0.0278982	0.763559	0.872996	protein_coding
ENSG00000064489.17	MEF2BNB-MEF2B	NA	0.0287405	0.815249	NA	protein_coding
ENSG00000064490.8	RFXANK	regulatory factor X associated ankyrin containing protein	0.431726	3.3e-06	2.11e-05	protein_coding
ENSG00000064545.10	TMEM161A	transmembrane protein 161A	-0.0853061	0.470284	0.655986	protein_coding
ENSG00000064547.9	LPAR2	lysophosphatidic acid receptor 2	0.13651	0.634966	0.785891	protein_coding
ENSG00000064601.12	CTSA	cathepsin A	-0.287541	0.00205871	0.00772964	protein_coding
ENSG00000064607.12	SUGP2	SURP and G-patch domain containing 2	-0.0965495	0.470153	0.65585	protein_coding
ENSG00000064651.9	SLC12A2	solute carrier family 12 member 2	-0.366871	3.82e-05	0.000205955	protein_coding
ENSG00000064652.6	SNX24	sorting nexin 24	0.590162	5.2e-08	4.25e-07	protein_coding
ENSG00000064655.14	EYA2	EYA transcriptional coactivator and phosphatase 2	2.86117	8.78e-18	1.58e-16	protein_coding
ENSG00000064666.10	CNN2	calponin 2	0.910474	9.71e-23	2.27e-21	protein_coding
ENSG00000064687.8	ABCA7	ATP binding cassette subfamily A member 7	-0.350121	0.00811019	0.0259061	protein_coding
ENSG00000064692.14	SNCAIP	synuclein alpha interacting protein	1.88462	7.49e-11	8.22e-10	protein_coding
ENSG00000064703.7	DDX20	DEAD-box helicase 20	-0.0462451	0.518453	0.697274	protein_coding
ENSG00000064726.5	BTBD1	BTB domain containing 1	-0.165929	0.00816456	0.0260542	protein_coding
ENSG00000064763.5	FAR2	fatty acyl-CoA reductase 2	0.128087	0.166864	0.315827	protein_coding
ENSG00000064787.8	BCAS1	breast carcinoma amplified sequence 1	-0.108825	0.335768	NA	protein_coding
ENSG00000064835.6	POU1F1	POU class 1 homeobox 1	NA	NA	NA	protein_coding
ENSG00000064886.9	CHI3L2	chitinase 3 like 2	-0.112921	0.326314	NA	protein_coding
ENSG00000064932.11	SBNO2	strawberry notch homolog 2	0.952033	2.17e-20	4.53e-19	protein_coding
ENSG00000064933.12	PMS1	PMS1 homolog 1, mismatch repair system component	0.054781	0.643466	0.792248	protein_coding
ENSG00000064961.14	HMG20B	high mobility group 20B	-0.00625405	0.941718	0.970949	protein_coding
ENSG00000064989.8	CALCRL	calcitonin receptor like receptor	-0.965837	2.03e-09	1.95e-08	protein_coding
ENSG00000064995.12	TAF11	TATA-box binding protein associated factor 11	0.175136	0.102577	0.21536	protein_coding
ENSG00000064999.12	ANKS1A	ankyrin repeat and sterile alpha motif domain containing 1A	-0.286007	0.015492	0.0452828	protein_coding
ENSG00000065000.11	AP3D1	adaptor related protein complex 3 delta 1 subunit	-0.280198	0.00187898	0.00710111	protein_coding
ENSG00000065029.10	ZNF76	zinc finger protein 76	-0.24067	0.0259295	0.0699646	protein_coding
ENSG00000065054.9	SLC9A3R2	SLC9A3 regulator 2	-0.292331	0.0038024	0.0133356	protein_coding
ENSG00000065057.3	NTHL1	nth like DNA glycosylase 1	0.642712	0.000101009	0.000502326	protein_coding
ENSG00000065060.12	UHRF1BP1	UHRF1 binding protein 1	0.252822	0.0189473	0.0536764	protein_coding
ENSG00000065135.7	GNAI3	G protein subunit alpha i3	0.186545	0.00351637	0.0124551	protein_coding
ENSG00000065150.14	IPO5	importin 5	-0.118797	0.0807751	0.178102	protein_coding
ENSG00000065154.7	OAT	ornithine aminotransferase	-0.0974967	0.164781	0.312913	protein_coding
ENSG00000065183.10	WDR3	WD repeat domain 3	-0.0796074	0.34302	0.531296	protein_coding
ENSG00000065243.14	PKN2	protein kinase N2	-0.263467	0.000990459	0.00400602	protein_coding
ENSG00000065268.6	WDR18	WD repeat domain 18	0.706921	1.96e-09	1.89e-08	protein_coding
ENSG00000065308.4	TRAM2	translocation associated membrane protein 2	-0.0994537	0.113663	0.2336	protein_coding
ENSG00000065320.4	NTN1	netrin 1	0.969546	0.00307711	0.0110573	protein_coding
ENSG00000065325.7	GLP2R	glucagon like peptide 2 receptor	-0.0673128	0.83657	0.916913	protein_coding
ENSG00000065328.12	MCM10	minichromosome maintenance 10 replication initiation factor	1.03695	2.81e-07	2.1e-06	protein_coding
ENSG00000065357.15	DGKA	diacylglycerol kinase alpha	-0.231384	0.0022838	0.00849494	protein_coding
ENSG00000065361.10	ERBB3	erb-b2 receptor tyrosine kinase 3	0.427423	0.00918606	0.0288163	protein_coding
ENSG00000065371.13	ROPN1	rhophilin associated tail protein 1	-0.616205	0.0194826	0.0549859	protein_coding
ENSG00000065413.12	ANKRD44	ankyrin repeat domain 44	-0.496561	0.000187412	0.000887183	protein_coding
ENSG00000065427.10	KARS	lysyl-tRNA synthetase	0.322604	1.62e-05	9.28e-05	protein_coding
ENSG00000065457.6	ADAT1	adenosine deaminase, tRNA specific 1	-0.580025	1.02e-08	9.12e-08	protein_coding
ENSG00000065485.13	PDIA5	protein disulfide isomerase family A member 5	0.151288	0.0808907	0.178289	protein_coding
ENSG00000065491.8	TBC1D22B	TBC1 domain family member 22B	0.0151626	0.882263	0.940582	protein_coding
ENSG00000065518.7	NDUFB4	NADH:ubiquinone oxidoreductase subunit B4	-0.0216561	0.78384	0.884963	protein_coding
ENSG00000065526.6	SPEN	spen family transcriptional repressor	-0.0423839	0.716756	0.841056	protein_coding
ENSG00000065534.14	MYLK	myosin light chain kinase	-0.071051	0.485749	0.669572	protein_coding
ENSG00000065548.13	ZC3H15	zinc finger CCCH-type containing 15	0.0243541	0.740095	0.858243	protein_coding
ENSG00000065559.10	MAP2K4	mitogen-activated protein kinase kinase 4	-0.0756969	0.252345	0.429808	protein_coding
ENSG00000065600.8	TMEM206	transmembrane protein 206	-0.239869	0.136052	0.269476	protein_coding
ENSG00000065609.10	SNAP91	synaptosome associated protein 91	NA	NA	NA	protein_coding
ENSG00000065613.9	SLK	STE20 like kinase	-0.154428	0.100207	0.211198	protein_coding
ENSG00000065615.8	CYB5R4	cytochrome b5 reductase 4	0.367254	0.00491235	0.0167456	protein_coding
ENSG00000065618.12	COL17A1	collagen type XVII alpha 1 chain	-0.202207	0.524231	0.701841	protein_coding
ENSG00000065621.9	GSTO2	glutathione S-transferase omega 2	-0.174535	0.121976	0.247082	protein_coding
ENSG00000065665.16	SEC61A2	Sec61 translocon alpha 2 subunit	-0.592313	0.000614458	0.00260692	protein_coding
ENSG00000065675.10	PRKCQ	protein kinase C theta	0.318358	0.157486	NA	protein_coding
ENSG00000065717.10	TLE2	transducin like enhancer of split 2	1.67577	5e-09	4.61e-08	protein_coding
ENSG00000065802.7	ASB1	ankyrin repeat and SOCS box containing 1	-0.582303	3.72e-14	5.36e-13	protein_coding
ENSG00000065809.9	FAM107B	family with sequence similarity 107 member B	-0.0107501	0.88711	0.943208	protein_coding
ENSG00000065833.7	ME1	malic enzyme 1	-0.119893	0.104275	0.21806	protein_coding
ENSG00000065882.11	TBC1D1	TBC1 domain family member 1	0.566677	1.22e-09	1.19e-08	protein_coding
ENSG00000065883.10	CDK13	cyclin dependent kinase 13	-0.0717367	0.43934	0.628032	protein_coding
ENSG00000065911.7	MTHFD2	methylenetetrahydrofolate dehydrogenase (NADP+ dependent) 2, methenyltetrahydrofolate cyclohydrolase	0.8625	3.83e-42	2.1e-40	protein_coding
ENSG00000065923.5	SLC9A7	solute carrier family 9 member A7	-1.41482	1.8e-53	1.4e-51	protein_coding
ENSG00000065970.4	FOXJ2	forkhead box J2	0.101124	0.35041	0.538969	protein_coding
ENSG00000065978.13	YBX1	Y-box binding protein 1	0.198653	0.000590003	0.00251078	protein_coding
ENSG00000065989.11	PDE4A	phosphodiesterase 4A	0.0702754	0.520712	0.699131	protein_coding
ENSG00000066027.6	PPP2R5A	protein phosphatase 2 regulatory subunit B'alpha	0.490182	2.7e-11	3.06e-10	protein_coding
ENSG00000066032.14	CTNNA2	catenin alpha 2	-0.11807	0.314856	NA	protein_coding
ENSG00000066044.9	ELAVL1	ELAV like RNA binding protein 1	-0.00916088	0.903159	0.951655	protein_coding
ENSG00000066056.9	TIE1	tyrosine kinase with immunoglobulin like and EGF like domains 1	0.158748	0.379027	NA	protein_coding
ENSG00000066084.8	DIP2B	disco interacting protein 2 homolog B	0.0860747	0.454007	0.641136	protein_coding
ENSG00000066117.10	SMARCD1	SWI/SNF related, matrix associated, actin dependent regulator of chromatin, subfamily d, member 1	0.38282	1.42e-05	8.21e-05	protein_coding
ENSG00000066135.8	KDM4A	lysine demethylase 4A	-0.00826467	0.92696	0.963109	protein_coding
ENSG00000066136.15	NFYC	nuclear transcription factor Y subunit gamma	0.209396	0.0153572	0.044929	protein_coding
ENSG00000066185.8	ZMYND12	zinc finger MYND-type containing 12	-0.628841	0.068308	0.155624	protein_coding
ENSG00000066230.6	SLC9A3	solute carrier family 9 member A3	0.116766	0.656424	NA	protein_coding
ENSG00000066248.10	NGEF	neuronal guanine nucleotide exchange factor	0.188768	0.536221	NA	protein_coding
ENSG00000066279.12	ASPM	abnormal spindle microtubule assembly	1.15938	2.22e-38	1.04e-36	protein_coding
ENSG00000066294.10	CD84	CD84 molecule	NA	NA	NA	protein_coding
ENSG00000066322.8	ELOVL1	ELOVL fatty acid elongase 1	-0.0282191	0.753271	0.866087	protein_coding
ENSG00000066336.7	SPI1	Spi-1 proto-oncogene	0.0800047	0.707505	NA	protein_coding
ENSG00000066379.10	ZNRD1	zinc ribbon domain containing 1	0.70237	1.62e-06	1.09e-05	protein_coding
ENSG00000066382.12	MPPED2	metallophosphoesterase domain containing 2	NA	NA	NA	protein_coding
ENSG00000066405.8	CLDN18	claudin 18	-0.108825	0.335768	NA	protein_coding
ENSG00000066422.4	ZBTB11	zinc finger and BTB domain containing 11	-0.233658	0.000483963	0.00209457	protein_coding
ENSG00000066427.17	ATXN3	ataxin 3	0.182935	0.0362512	0.0926276	protein_coding
ENSG00000066455.8	GOLGA5	golgin A5	0.00659638	0.917944	0.959849	protein_coding
ENSG00000066468.16	FGFR2	fibroblast growth factor receptor 2	-0.146528	0.657511	0.801487	protein_coding
ENSG00000066557.5	LRRC40	leucine rich repeat containing 40	0.366652	0.00266257	0.00974831	protein_coding
ENSG00000066583.7	ISOC1	isochorismatase domain containing 1	0.524078	0.000601505	0.00255751	protein_coding
ENSG00000066629.12	EML1	echinoderm microtubule associated protein like 1	-0.370454	0.000509947	0.00219732	protein_coding
ENSG00000066651.12	TRMT11	tRNA methyltransferase 11 homolog	0.130742	0.320648	0.507071	protein_coding
ENSG00000066654.8	THUMPD1	THUMP domain containing 1	-0.0363128	0.600698	0.761797	protein_coding
ENSG00000066697.10	MSANTD3	Myb/SANT DNA binding domain containing 3	-0.17386	0.0459706	0.112438	protein_coding
ENSG00000066735.10	KIF26A	kinesin family member 26A	2.56177	3.69e-13	4.89e-12	protein_coding
ENSG00000066739.7	ATG2B	autophagy related 2B	-0.140629	0.197522	0.358704	protein_coding
ENSG00000066777.4	ARFGEF1	ADP ribosylation factor guanine nucleotide exchange factor 1	-0.0619705	0.414198	0.603366	protein_coding
ENSG00000066813.10	ACSM2B	acyl-CoA synthetase medium-chain family member 2B	-0.112921	0.326314	NA	protein_coding
ENSG00000066827.11	ZFAT	zinc finger and AT-hook domain containing	-0.345789	0.00144109	0.00561192	protein_coding
ENSG00000066855.11	MTFR1	mitochondrial fission regulator 1	0.00814419	0.938099	0.96887	protein_coding
ENSG00000066923.13	STAG3	stromal antigen 3	0.90076	0.0132502	0.0396475	protein_coding
ENSG00000066926.6	FECH	ferrochelatase	0.198035	0.00299956	0.0108163	protein_coding
ENSG00000066933.11	MYO9A	myosin IXA	-0.171972	0.207121	0.37193	protein_coding
ENSG00000067048.12	DDX3Y	DEAD-box helicase 3, Y-linked	-0.458681	2.61e-14	3.81e-13	protein_coding
ENSG00000067057.11	PFKP	phosphofructokinase, platelet	0.341949	0.000262187	0.00120532	protein_coding
ENSG00000067064.6	IDI1	isopentenyl-diphosphate delta isomerase 1	-0.461822	9.05e-06	5.4e-05	protein_coding
ENSG00000067066.12	SP100	SP100 nuclear antigen	-0.203405	0.00254987	0.00936899	protein_coding
ENSG00000067082.10	KLF6	Kruppel like factor 6	0.32452	7.49e-06	4.53e-05	protein_coding
ENSG00000067113.12	PPAP2A	NA	-0.378749	8.22e-06	4.94e-05	protein_coding
ENSG00000067141.12	NEO1	neogenin 1	-0.485098	1.48e-05	8.54e-05	protein_coding
ENSG00000067167.3	TRAM1	translocation associated membrane protein 1	0.290153	7.88e-05	0.000400299	protein_coding
ENSG00000067177.10	PHKA1	phosphorylase kinase regulatory subunit alpha 1	1.03591	2.76e-13	3.71e-12	protein_coding
ENSG00000067182.3	TNFRSF1A	TNF receptor superfamily member 1A	0.343245	0.000153083	0.000737148	protein_coding
ENSG00000067191.11	CACNB1	calcium voltage-gated channel auxiliary subunit beta 1	0.154751	0.240902	0.416033	protein_coding
ENSG00000067208.10	EVI5	ecotropic viral integration site 5	-0.389735	1.17e-05	6.86e-05	protein_coding
ENSG00000067221.9	STOML1	stomatin like 1	-0.867365	4.38e-09	4.06e-08	protein_coding
ENSG00000067225.13	PKM	pyruvate kinase, muscle	-0.136443	0.120434	0.244489	protein_coding
ENSG00000067248.5	DHX29	DExH-box helicase 29	-0.296267	6.42e-05	0.000331568	protein_coding
ENSG00000067334.9	DNTTIP2	deoxynucleotidyltransferase terminal interacting protein 2	-0.202564	0.00477609	0.0163437	protein_coding
ENSG00000067365.10	METTL22	methyltransferase like 22	0.373691	0.00012523	0.000613435	protein_coding
ENSG00000067369.9	TP53BP1	tumor protein p53 binding protein 1	-0.111805	0.213724	0.380195	protein_coding
ENSG00000067445.15	TRO	trophinin	-0.105527	0.347583	0.536202	protein_coding
ENSG00000067533.5	RRP15	ribosomal RNA processing 15 homolog	-0.037136	0.691081	0.824147	protein_coding
ENSG00000067560.6	RHOA	ras homolog family member A	-0.00252794	0.966919	0.98293	protein_coding
ENSG00000067596.6	DHX8	DEAH-box helicase 8	-0.0231849	0.81091	0.901678	protein_coding
ENSG00000067606.11	PRKCZ	protein kinase C zeta	-0.412634	0.0712057	0.16077	protein_coding
ENSG00000067646.7	ZFY	zinc finger protein, Y-linked	-0.0371541	0.619059	0.774921	protein_coding
ENSG00000067704.8	IARS2	isoleucyl-tRNA synthetase 2, mitochondrial	-0.141595	0.0209124	0.0583985	protein_coding
ENSG00000067715.9	SYT1	synaptotagmin 1	-4.68972	0	0	protein_coding
ENSG00000067798.9	NAV3	neuron navigator 3	-0.750882	4.93e-17	8.46e-16	protein_coding
ENSG00000067829.13	IDH3G	isocitrate dehydrogenase 3 (NAD(+)) gamma	0.166622	0.0485108	0.117579	protein_coding
ENSG00000067836.8	ROGDI	rogdi homolog	-0.26268	0.0180051	0.0514385	protein_coding
ENSG00000067840.7	PDZD4	PDZ domain containing 4	-2.08447	2.95e-14	4.28e-13	protein_coding
ENSG00000067842.13	ATP2B3	ATPase plasma membrane Ca2+ transporting 3	-0.108632	0.544673	NA	protein_coding
ENSG00000067900.5	ROCK1	Rho associated coiled-coil containing protein kinase 1	-0.214471	0.0120824	0.0366399	protein_coding
ENSG00000067955.9	CBFB	core-binding factor beta subunit	0.185442	0.0234557	0.0642535	protein_coding
ENSG00000067992.8	PDK3	pyruvate dehydrogenase kinase 3	0.695516	1.03e-05	6.07e-05	protein_coding
ENSG00000068001.9	HYAL2	hyaluronoglucosaminidase 2	-0.832567	2.25e-08	1.92e-07	protein_coding
ENSG00000068024.12	HDAC4	histone deacetylase 4	0.0912191	0.426063	0.615432	protein_coding
ENSG00000068028.13	RASSF1	Ras association domain family member 1	0.0437423	0.626357	0.780016	protein_coding
ENSG00000068078.13	FGFR3	fibroblast growth factor receptor 3	-1.12653	2.42e-06	1.57e-05	protein_coding
ENSG00000068079.3	IFI35	interferon induced protein 35	0.509287	1.78e-08	1.54e-07	protein_coding
ENSG00000068097.10	HEATR6	HEAT repeat containing 6	0.138659	0.165915	0.314488	protein_coding
ENSG00000068120.10	COASY	Coenzyme A synthase	0.455226	3.53e-06	2.25e-05	protein_coding
ENSG00000068137.10	PLEKHH3	pleckstrin homology, MyTH4 and FERM domain containing H3	0.739886	9.5e-17	1.6e-15	protein_coding
ENSG00000068305.13	MEF2A	myocyte enhancer factor 2A	-0.431956	1.8e-12	2.26e-11	protein_coding
ENSG00000068308.9	OTUD5	OTU deubiquitinase 5	-0.0765655	0.480692	0.665574	protein_coding
ENSG00000068323.11	TFE3	transcription factor binding to IGHM enhancer 3	-0.125121	0.143263	0.280623	protein_coding
ENSG00000068354.10	TBC1D25	TBC1 domain family member 25	-0.211473	0.157938	0.302588	protein_coding
ENSG00000068366.14	ACSL4	acyl-CoA synthetase long-chain family member 4	-0.319835	3.13e-06	2.01e-05	protein_coding
ENSG00000068383.14	INPP5A	inositol polyphosphate-5-phosphatase A	0.36557	4.81e-06	3e-05	protein_coding
ENSG00000068394.9	GPKOW	G-patch domain and KOW motifs	0.0928646	0.494802	0.677067	protein_coding
ENSG00000068400.9	GRIPAP1	GRIP1 associated protein 1	-0.112862	0.17373	0.326049	protein_coding
ENSG00000068438.10	FTSJ1	FtsJ RNA methyltransferase homolog 1 (E. coli)	0.190943	0.0417597	0.104062	protein_coding
ENSG00000068489.8	PRR11	proline rich 11	1.554	9.67e-42	5.22e-40	protein_coding
ENSG00000068615.12	REEP1	receptor accessory protein 1	-0.463434	0.130808	0.261404	protein_coding
ENSG00000068650.14	ATP11A	ATPase phospholipid transporting 11A	-0.614443	4.75e-11	5.29e-10	protein_coding
ENSG00000068654.11	POLR1A	RNA polymerase I subunit A	-0.241147	0.0245466	0.0667296	protein_coding
ENSG00000068697.6	LAPTM4A	lysosomal protein transmembrane 4 alpha	-0.368117	3.8e-05	0.00020457	protein_coding
ENSG00000068724.11	TTC7A	tetratricopeptide repeat domain 7A	0.372646	4.24e-05	0.000226478	protein_coding
ENSG00000068745.10	IP6K2	inositol hexakisphosphate kinase 2	-0.377672	0.000372628	0.00165515	protein_coding
ENSG00000068781.16	STON1-GTF2A1L	STON1-GTF2A1L readthrough	NA	NA	NA	protein_coding
ENSG00000068784.8	SRBD1	S1 RNA binding domain 1	-0.416826	4.84e-08	3.98e-07	protein_coding
ENSG00000068793.13	CYFIP1	cytoplasmic FMR1 interacting protein 1	-0.0748341	0.388806	0.578072	protein_coding
ENSG00000068796.12	KIF2A	kinesin family member 2A	0.114562	0.11983	0.243539	protein_coding
ENSG00000068831.14	RASGRP2	RAS guanyl releasing protein 2	3.04375	1.13e-46	7.15e-45	protein_coding
ENSG00000068878.10	PSME4	proteasome activator subunit 4	-0.3121	0.00116376	0.00463139	protein_coding
ENSG00000068885.10	IFT80	intraflagellar transport 80	0.101333	0.392976	0.582063	protein_coding
ENSG00000068903.15	SIRT2	sirtuin 2	-0.170924	0.0427913	0.106093	protein_coding
ENSG00000068912.9	ERLEC1	endoplasmic reticulum lectin 1	-0.632333	7.95e-19	1.52e-17	protein_coding
ENSG00000068971.9	PPP2R5B	protein phosphatase 2 regulatory subunit B'beta	-0.333004	0.000171649	0.000818098	protein_coding
ENSG00000068976.9	PYGM	glycogen phosphorylase, muscle associated	0.757586	0.0366964	0.0934948	protein_coding
ENSG00000068985.4	PAGE1	PAGE family member 1	NA	NA	NA	protein_coding
ENSG00000069011.11	PITX1	paired like homeodomain 1	0.249032	0.0429845	0.106469	protein_coding
ENSG00000069018.13	TRPC7	transient receptor potential cation channel subfamily C member 7	NA	NA	NA	protein_coding
ENSG00000069020.14	MAST4	microtubule associated serine/threonine kinase family member 4	-0.891744	5.82e-15	8.87e-14	protein_coding
ENSG00000069122.14	GPR116	NA	NA	NA	NA	protein_coding
ENSG00000069188.12	SDK2	sidekick cell adhesion molecule 2	1.0167	0.00140813	0.00549119	protein_coding
ENSG00000069206.11	ADAM7	ADAM metallopeptidase domain 7	NA	NA	NA	protein_coding
ENSG00000069248.8	NUP133	nucleoporin 133	-0.130311	0.0517117	0.124062	protein_coding
ENSG00000069275.12	NUCKS1	nuclear casein kinase and cyclin dependent kinase substrate 1	-0.0952903	0.228937	0.39992	protein_coding
ENSG00000069329.11	VPS35	VPS35, retromer complex component	-0.150473	0.0130011	0.0390153	protein_coding
ENSG00000069345.7	DNAJA2	DnaJ heat shock protein family (Hsp40) member A2	-0.173343	0.00946172	0.0295909	protein_coding
ENSG00000069399.8	BCL3	B-cell CLL/lymphoma 3	1.81216	1.24e-77	1.98e-75	protein_coding
ENSG00000069424.10	KCNAB2	potassium voltage-gated channel subfamily A regulatory beta subunit 2	-0.52347	0.000116153	0.000571269	protein_coding
ENSG00000069431.6	ABCC9	ATP binding cassette subfamily C member 9	-1.78981	3.91e-82	7.02e-80	protein_coding
ENSG00000069482.6	GAL	galanin and GMAP prepropeptide	0.107046	0.748582	0.863483	protein_coding
ENSG00000069493.9	CLEC2D	C-type lectin domain family 2 member D	-0.252032	0.488393	0.671866	protein_coding
ENSG00000069509.5	FUNDC1	FUN14 domain containing 1	0.0196843	0.865551	0.931371	protein_coding
ENSG00000069535.11	MAOB	monoamine oxidase B	-0.24235	0.324456	NA	protein_coding
ENSG00000069667.11	RORA	RAR related orphan receptor A	-0.828987	6.34e-17	1.08e-15	protein_coding
ENSG00000069696.6	DRD4	dopamine receptor D4	-0.341503	0.342398	0.530742	protein_coding
ENSG00000069702.6	TGFBR3	transforming growth factor beta receptor 3	0.866	8.79e-23	2.06e-21	protein_coding
ENSG00000069712.9	KIAA1107	KIAA1107	-0.43412	0.000855121	0.00350349	protein_coding
ENSG00000069764.5	PLA2G10	phospholipase A2 group X	-0.108825	0.335768	NA	protein_coding
ENSG00000069812.7	HES2	hes family bHLH transcription factor 2	-1.20776	0.000895174	0.00365841	protein_coding
ENSG00000069849.6	ATP1B3	ATPase Na+/K+ transporting subunit beta 3	-0.268767	0.000217273	0.0010165	protein_coding
ENSG00000069869.11	NEDD4	neural precursor cell expressed, developmentally down-regulated 4, E3 ubiquitin protein ligase	-0.258531	0.00178584	0.00679633	protein_coding
ENSG00000069943.5	PIGB	phosphatidylinositol glycan anchor biosynthesis class B	0.167721	0.0818045	0.179784	protein_coding
ENSG00000069956.7	MAPK6	mitogen-activated protein kinase 6	0.0430249	0.442636	0.631545	protein_coding
ENSG00000069966.14	GNB5	G protein subunit beta 5	-0.368614	5.08e-05	0.000268174	protein_coding
ENSG00000069974.11	RAB27A	RAB27A, member RAS oncogene family	1.0182	1.33e-31	4.78e-30	protein_coding
ENSG00000069998.8	CECR5	cat eye syndrome chromosome region, candidate 5	0.488777	1.07e-06	7.45e-06	protein_coding
ENSG00000070010.13	UFD1L	ubiquitin fusion degradation 1 like (yeast)	-0.12127	0.105261	0.21944	protein_coding
ENSG00000070018.4	LRP6	LDL receptor related protein 6	-0.555152	6.1e-09	5.58e-08	protein_coding
ENSG00000070019.3	GUCY2C	guanylate cyclase 2C	-0.0938497	0.502766	NA	protein_coding
ENSG00000070031.3	SCT	secretin	NA	NA	NA	protein_coding
ENSG00000070047.7	PHRF1	PHD and ring finger domains 1	-0.193482	0.0490853	0.118736	protein_coding
ENSG00000070061.10	IKBKAP	inhibitor of kappa light polypeptide gene enhancer in B-cells, kinase complex-associated protein	-0.0898492	0.269939	0.449837	protein_coding
ENSG00000070081.11	NUCB2	nucleobindin 2	-0.109941	0.0531367	0.12672	protein_coding
ENSG00000070087.9	PFN2	profilin 2	-0.0969121	0.205387	0.369564	protein_coding
ENSG00000070159.9	PTPN3	protein tyrosine phosphatase, non-receptor type 3	0.342498	0.00899925	0.0283236	protein_coding
ENSG00000070182.13	SPTB	spectrin beta, erythrocytic	0.349722	0.329409	0.516941	protein_coding
ENSG00000070190.8	DAPP1	dual adaptor of phosphotyrosine and 3-phosphoinositides 1	-1.4113	2.43e-05	0.000135174	protein_coding
ENSG00000070193.4	FGF10	fibroblast growth factor 10	NA	NA	NA	protein_coding
ENSG00000070214.11	SLC44A1	solute carrier family 44 member 1	0.251618	0.00124851	0.00492859	protein_coding
ENSG00000070269.9	TMEM260	transmembrane protein 260	-0.222857	0.021412	0.0595389	protein_coding
ENSG00000070366.8	SMG6	SMG6, nonsense mediated mRNA decay factor	-0.156416	0.138789	0.273776	protein_coding
ENSG00000070367.11	EXOC5	exocyst complex component 5	-0.291527	6.55e-05	0.000337995	protein_coding
ENSG00000070371.11	CLTCL1	clathrin heavy chain like 1	-0.313279	0.00435239	0.015041	protein_coding
ENSG00000070388.7	FGF22	fibroblast growth factor 22	-0.348911	0.195456	NA	protein_coding
ENSG00000070404.5	FSTL3	follistatin like 3	-0.172233	0.0440264	0.108646	protein_coding
ENSG00000070413.13	DGCR2	DiGeorge syndrome critical region gene 2	-0.45253	4.63e-08	3.81e-07	protein_coding
ENSG00000070423.13	RNF126	ring finger protein 126	0.164007	0.0681238	0.155313	protein_coding
ENSG00000070444.9	MNT	MAX network transcriptional repressor	0.385579	8.34e-06	5e-05	protein_coding
ENSG00000070476.10	ZXDC	ZXD family zinc finger C	0.0965521	0.390987	0.580038	protein_coding
ENSG00000070495.10	JMJD6	arginine demethylase and lysine hydroxylase	0.262376	0.00108752	0.00435898	protein_coding
ENSG00000070501.7	POLB	DNA polymerase beta	0.229092	0.139606	0.27494	protein_coding
ENSG00000070526.10	ST6GALNAC1	ST6 N-acetylgalactosaminide alpha-2,6-sialyltransferase 1	-0.194544	0.190724	NA	protein_coding
ENSG00000070540.8	WIPI1	WD repeat domain, phosphoinositide interacting 1	0.17425	0.0121354	0.036778	protein_coding
ENSG00000070601.5	FRMPD1	FERM and PDZ domain containing 1	-0.439966	0.0749763	NA	protein_coding
ENSG00000070610.10	GBA2	glucosylceramidase beta 2	0.189394	0.131015	0.261736	protein_coding
ENSG00000070614.10	NDST1	N-deacetylase and N-sulfotransferase 1	-0.138252	0.168015	0.317668	protein_coding
ENSG00000070669.12	ASNS	asparagine synthetase (glutamine-hydrolyzing)	0.887505	1.24e-30	4.21e-29	protein_coding
ENSG00000070718.7	AP3M2	adaptor related protein complex 3 mu 2 subunit	-0.927409	8.8e-20	1.78e-18	protein_coding
ENSG00000070729.9	CNGB1	cyclic nucleotide gated channel beta 1	0.128315	0.297331	NA	protein_coding
ENSG00000070731.5	ST6GALNAC2	ST6 N-acetylgalactosaminide alpha-2,6-sialyltransferase 2	1.00202	0.000125496	0.000614428	protein_coding
ENSG00000070748.13	CHAT	choline O-acetyltransferase	-0.336402	0.121691	NA	protein_coding
ENSG00000070756.9	PABPC1	poly(A) binding protein cytoplasmic 1	0.0297197	0.621769	0.776923	protein_coding
ENSG00000070759.12	TESK2	testis-specific kinase 2	0.335471	0.0669491	0.153062	protein_coding
ENSG00000070761.3	C16orf80	NA	-0.477105	6.19e-08	5.01e-07	protein_coding
ENSG00000070770.4	CSNK2A2	casein kinase 2 alpha 2	0.390519	5.14e-06	3.19e-05	protein_coding
ENSG00000070778.8	PTPN21	protein tyrosine phosphatase, non-receptor type 21	-0.306556	7.39e-05	0.00037725	protein_coding
ENSG00000070785.12	EIF2B3	eukaryotic translation initiation factor 2B subunit gamma	-0.0802542	0.339404	0.527448	protein_coding
ENSG00000070808.11	CAMK2A	calcium/calmodulin dependent protein kinase II alpha	1.3767	7.14e-05	0.000365453	protein_coding
ENSG00000070814.13	TCOF1	treacle ribosome biogenesis factor 1	0.253191	0.00685824	0.0224339	protein_coding
ENSG00000070831.11	CDC42	cell division cycle 42	-0.0176233	0.839349	0.918262	protein_coding
ENSG00000070882.8	OSBPL3	oxysterol binding protein like 3	-0.258151	3.63e-05	0.000196682	protein_coding
ENSG00000070886.6	EPHA8	EPH receptor A8	-0.108825	0.335768	NA	protein_coding
ENSG00000070915.5	SLC12A3	solute carrier family 12 member 3	-0.301235	0.212705	NA	protein_coding
ENSG00000070950.5	RAD18	RAD18, E3 ubiquitin protein ligase	-0.366382	0.000218558	0.00102178	protein_coding
ENSG00000070961.10	ATP2B1	ATPase plasma membrane Ca2+ transporting 1	-0.838045	1.11e-32	4.18e-31	protein_coding
ENSG00000070985.9	TRPM5	transient receptor potential cation channel subfamily M member 5	0.111602	0.333519	NA	protein_coding
ENSG00000071051.9	NCK2	NCK adaptor protein 2	0.0246257	0.825404	0.909898	protein_coding
ENSG00000071054.11	MAP4K4	mitogen-activated protein kinase kinase kinase kinase 4	-0.000865734	0.991212	0.995737	protein_coding
ENSG00000071073.7	MGAT4A	mannosyl (alpha-1,3-)-glycoprotein beta-1,4-N-acetylglucosaminyltransferase, isozyme A	-0.0544138	0.869329	0.933515	protein_coding
ENSG00000071082.6	RPL31	ribosomal protein L31	0.255406	0.0355113	0.0910518	protein_coding
ENSG00000071127.12	WDR1	WD repeat domain 1	0.437691	2.6e-06	1.69e-05	protein_coding
ENSG00000071189.17	SNX13	sorting nexin 13	-0.464603	1.12e-11	1.31e-10	protein_coding
ENSG00000071203.5	MS4A12	membrane spanning 4-domains A12	-0.656689	0.0439389	0.108485	protein_coding
ENSG00000071205.7	ARHGAP10	Rho GTPase activating protein 10	0.193642	0.0213462	0.0593813	protein_coding
ENSG00000071242.7	RPS6KA2	ribosomal protein S6 kinase A2	1.22643	6.32e-34	2.51e-32	protein_coding
ENSG00000071243.11	ING3	inhibitor of growth family member 3	0.171145	0.199527	0.361446	protein_coding
ENSG00000071246.6	VASH1	vasohibin 1	0.575879	3.08e-07	2.29e-06	protein_coding
ENSG00000071282.7	LMCD1	LIM and cysteine rich domains 1	0.874717	7.74e-57	6.56e-55	protein_coding
ENSG00000071462.7	WBSCR22	Williams-Beuren syndrome chromosome region 22	-0.396445	7.32e-06	4.44e-05	protein_coding
ENSG00000071537.9	SEL1L	SEL1L ERAD E3 ligase adaptor subunit	-0.427456	1.01e-06	7.03e-06	protein_coding
ENSG00000071539.9	TRIP13	thyroid hormone receptor interactor 13	1.31305	5.79e-19	1.11e-17	protein_coding
ENSG00000071553.12	ATP6AP1	ATPase H+ transporting accessory protein 1	-0.871767	5.54e-17	9.49e-16	protein_coding
ENSG00000071564.10	TCF3	transcription factor 3	0.26067	0.0115212	0.0352071	protein_coding
ENSG00000071575.7	TRIB2	tribbles pseudokinase 2	0.237535	0.00400706	0.0140025	protein_coding
ENSG00000071626.12	DAZAP1	DAZ associated protein 1	0.668121	1.61e-16	2.67e-15	protein_coding
ENSG00000071655.12	MBD3	methyl-CpG binding domain protein 3	-0.0216666	0.821656	0.90778	protein_coding
ENSG00000071677.1	PRLH	prolactin releasing hormone	NA	NA	NA	protein_coding
ENSG00000071794.11	HLTF	helicase like transcription factor	0.124103	0.0771897	0.171795	protein_coding
ENSG00000071859.10	FAM50A	family with sequence similarity 50 member A	0.0820352	0.365915	0.554994	protein_coding
ENSG00000071889.12	FAM3A	family with sequence similarity 3 member A	-0.215586	0.0590067	0.13803	protein_coding
ENSG00000071894.10	CPSF1	cleavage and polyadenylation specific factor 1	0.340851	1.79e-05	0.000101753	protein_coding
ENSG00000071909.14	MYO3B	myosin IIIB	-0.271088	0.297349	NA	protein_coding
ENSG00000071967.7	CYBRD1	cytochrome b reductase 1	-0.939035	1.99e-36	8.73e-35	protein_coding
ENSG00000071991.4	CDH19	cadherin 19	NA	NA	NA	protein_coding
ENSG00000071994.6	PDCD2	programmed cell death 2	0.159771	0.0362536	0.0926276	protein_coding
ENSG00000072041.12	SLC6A15	solute carrier family 6 member 15	0.488029	0.0871503	0.188737	protein_coding
ENSG00000072042.8	RDH11	retinol dehydrogenase 11 (all-trans/9-cis/11-cis)	-0.0958052	0.233506	0.406086	protein_coding
ENSG00000072062.9	PRKACA	protein kinase cAMP-activated catalytic subunit alpha	-0.236677	0.0161698	0.0469835	protein_coding
ENSG00000072071.12	LPHN1	NA	-0.855662	1.2e-13	1.66e-12	protein_coding
ENSG00000072080.6	SPP2	secreted phosphoprotein 2	-0.112921	0.326314	NA	protein_coding
ENSG00000072110.9	ACTN1	actinin alpha 1	0.088224	0.348273	0.536673	protein_coding
ENSG00000072121.11	ZFYVE26	zinc finger FYVE-type containing 26	-0.399093	3.94e-05	0.000211831	protein_coding
ENSG00000072133.6	RPS6KA6	ribosomal protein S6 kinase A6	-0.0553271	0.656428	0.800765	protein_coding
ENSG00000072134.11	EPN2	epsin 2	-0.076159	0.353696	0.542596	protein_coding
ENSG00000072135.8	PTPN18	protein tyrosine phosphatase, non-receptor type 18	0.838296	4.31e-17	7.44e-16	protein_coding
ENSG00000072163.14	LIMS2	LIM zinc finger domain containing 2	0.303749	0.000709537	0.00296914	protein_coding
ENSG00000072182.8	ASIC4	acid sensing ion channel subunit family member 4	-0.248994	0.465977	0.65219	protein_coding
ENSG00000072195.10	SPEG	SPEG complex locus	0.42282	0.049419	0.119469	protein_coding
ENSG00000072201.9	LNX1	ligand of numb-protein X 1	0.34809	0.33858	0.527086	protein_coding
ENSG00000072210.14	ALDH3A2	aldehyde dehydrogenase 3 family member A2	0.0130878	0.88456	0.941714	protein_coding
ENSG00000072274.8	TFRC	transferrin receptor	-0.0260168	0.71644	0.840969	protein_coding
ENSG00000072310.12	SREBF1	sterol regulatory element binding transcription factor 1	0.633902	1.6e-18	3.01e-17	protein_coding
ENSG00000072315.3	TRPC5	transient receptor potential cation channel subfamily C member 5	NA	NA	NA	protein_coding
ENSG00000072364.8	AFF4	AF4/FMR2 family member 4	-0.304868	0.00813212	0.0259634	protein_coding
ENSG00000072401.10	UBE2D1	ubiquitin conjugating enzyme E2 D1	0.169232	0.0589631	0.137961	protein_coding
ENSG00000072415.4	MPP5	membrane palmitoylated protein 5	-0.143812	0.0574957	0.135125	protein_coding
ENSG00000072422.12	RHOBTB1	Rho related BTB domain containing 1	0.617146	4.58e-14	6.55e-13	protein_coding
ENSG00000072444.10	ASAH2C	NA	-0.290268	0.382448	0.571614	protein_coding
ENSG00000072501.12	SMC1A	structural maintenance of chromosomes 1A	-0.13316	0.117603	0.240111	protein_coding
ENSG00000072506.8	HSD17B10	hydroxysteroid 17-beta dehydrogenase 10	0.355324	0.00087987	0.00360065	protein_coding
ENSG00000072518.16	MARK2	microtubule affinity regulating kinase 2	-0.0563103	0.526764	0.704033	protein_coding
ENSG00000072571.14	HMMR	hyaluronan mediated motility receptor	2.48674	1.55e-59	1.42e-57	protein_coding
ENSG00000072609.13	CHFR	checkpoint with forkhead and ring finger domains	0.126246	0.162782	0.309808	protein_coding
ENSG00000072657.4	TRHDE	thyrotropin releasing hormone degrading enzyme	0.399567	1.64e-06	1.1e-05	protein_coding
ENSG00000072682.14	P4HA2	prolyl 4-hydroxylase subunit alpha 2	-0.0158852	0.850792	0.923558	protein_coding
ENSG00000072694.14	FCGR2B	Fc fragment of IgG receptor IIb	NA	NA	NA	protein_coding
ENSG00000072736.14	NFATC3	nuclear factor of activated T-cells 3	0.0258484	0.806463	0.899008	protein_coding
ENSG00000072756.12	TRNT1	tRNA nucleotidyl transferase 1	-0.0263167	0.782939	0.884821	protein_coding
ENSG00000072778.15	ACADVL	acyl-CoA dehydrogenase, very long chain	-0.0338878	0.73219	0.852932	protein_coding
ENSG00000072786.8	STK10	serine/threonine kinase 10	-0.253446	0.00351884	0.0124616	protein_coding
ENSG00000072803.13	FBXW11	F-box and WD repeat domain containing 11	-0.128856	0.0793426	0.175596	protein_coding
ENSG00000072818.7	ACAP1	ArfGAP with coiled-coil, ankyrin repeat and PH domains 1	0.801571	0.00100526	0.00405835	protein_coding
ENSG00000072832.10	CRMP1	collapsin response mediator protein 1	-0.194601	0.533591	0.709282	protein_coding
ENSG00000072840.8	EVC	EvC ciliary complex subunit 1	-0.573396	8.63e-11	9.4e-10	protein_coding
ENSG00000072849.6	DERL2	derlin 2	-0.158585	0.0442642	0.109095	protein_coding
ENSG00000072858.6	SIDT1	SID1 transmembrane family member 1	-0.108825	0.335768	NA	protein_coding
ENSG00000072864.8	NDE1	nudE neurodevelopment protein 1	0.518503	1.68e-08	1.45e-07	protein_coding
ENSG00000072952.14	MRVI1	murine retrovirus integration site 1 homolog	-0.7931	5.72e-23	1.37e-21	protein_coding
ENSG00000072954.2	TMEM38A	transmembrane protein 38A	-0.813542	0.00112483	0.00449658	protein_coding
ENSG00000072958.4	AP1M1	adaptor related protein complex 1 mu 1 subunit	0.242896	0.02032	0.0569881	protein_coding
ENSG00000073008.10	PVR	poliovirus receptor	0.500806	1.05e-12	1.35e-11	protein_coding
ENSG00000073009.8	IKBKG	inhibitor of kappa light polypeptide gene enhancer in B-cells, kinase gamma	0.00487379	0.972496	0.985988	protein_coding
ENSG00000073050.7	XRCC1	X-ray repair cross complementing 1	0.240068	0.0674839	0.153997	protein_coding
ENSG00000073060.11	SCARB1	scavenger receptor class B member 1	-0.036239	0.688328	0.823064	protein_coding
ENSG00000073067.9	CYP2W1	cytochrome P450 family 2 subfamily W member 1	-0.130517	0.661192	0.804422	protein_coding
ENSG00000073111.9	MCM2	minichromosome maintenance complex component 2	0.0409054	0.747192	0.862287	protein_coding
ENSG00000073146.11	MOV10L1	Mov10 RISC complex RNA helicase like 1	0.189604	0.378386	0.56771	protein_coding
ENSG00000073150.9	PANX2	pannexin 2	-0.729468	4.83e-06	3.01e-05	protein_coding
ENSG00000073169.9	RP3-402G11.5	NA	-0.125342	0.209459	0.375234	protein_coding
ENSG00000073282.8	TP63	tumor protein p63	-0.112921	0.326314	NA	protein_coding
ENSG00000073331.13	ALPK1	alpha kinase 1	0.602147	2.43e-08	2.07e-07	protein_coding
ENSG00000073350.9	LLGL2	LLGL2, scribble cell polarity complex component	-0.534425	0.0176481	0.0505805	protein_coding
ENSG00000073417.10	PDE8A	phosphodiesterase 8A	0.109157	0.222116	0.391109	protein_coding
ENSG00000073464.7	CLCN4	chloride voltage-gated channel 4	0.890235	0.0142836	0.0422054	protein_coding
ENSG00000073536.13	NLE1	notchless homolog 1	0.18524	0.186771	0.344289	protein_coding
ENSG00000073578.12	SDHA	succinate dehydrogenase complex flavoprotein subunit A	0.332414	0.000431792	0.00189008	protein_coding
ENSG00000073584.14	SMARCE1	SWI/SNF related, matrix associated, actin dependent regulator of chromatin, subfamily e, member 1	0.0865371	0.17369	0.326006	protein_coding
ENSG00000073598.5	FNDC8	fibronectin type III domain containing 8	-0.0022343	0.985945	NA	protein_coding
ENSG00000073605.14	GSDMB	gasdermin B	0.0523879	0.885279	0.942049	protein_coding
ENSG00000073614.7	KDM5A	lysine demethylase 5A	-0.104742	0.339215	0.527448	protein_coding
ENSG00000073670.9	ADAM11	ADAM metallopeptidase domain 11	0.808276	0.016209	0.0470765	protein_coding
ENSG00000073711.6	PPP2R3A	protein phosphatase 2 regulatory subunit B''alpha	0.196422	0.0259125	0.069938	protein_coding
ENSG00000073712.9	FERMT2	fermitin family member 2	0.0784056	0.193622	0.3536	protein_coding
ENSG00000073734.8	ABCB11	ATP binding cassette subfamily B member 11	-0.193886	NA	NA	protein_coding
ENSG00000073737.12	DHRS9	dehydrogenase/reductase 9	-1.28622	5.26e-05	0.000276124	protein_coding
ENSG00000073754.5	CD5L	CD5 molecule like	NA	NA	NA	protein_coding
ENSG00000073756.7	PTGS2	prostaglandin-endoperoxide synthase 2	0.164869	0.118783	0.24194	protein_coding
ENSG00000073792.11	IGF2BP2	insulin like growth factor 2 mRNA binding protein 2	0.633759	2.59e-23	6.31e-22	protein_coding
ENSG00000073803.9	MAP3K13	mitogen-activated protein kinase kinase kinase 13	0.987391	7.01e-26	1.93e-24	protein_coding
ENSG00000073849.10	ST6GAL1	ST6 beta-galactoside alpha-2,6-sialyltransferase 1	0.30472	0.0936867	0.200258	protein_coding
ENSG00000073861.2	TBX21	T-box 21	NA	NA	NA	protein_coding
ENSG00000073910.15	FRY	FRY microtubule binding protein	-0.177686	0.117179	0.239345	protein_coding
ENSG00000073921.13	PICALM	phosphatidylinositol binding clathrin assembly protein	-0.195748	0.00172248	0.00658205	protein_coding
ENSG00000073969.14	NSF	N-ethylmaleimide sensitive factor, vesicle fusing ATPase	-0.482927	8.18e-08	6.52e-07	protein_coding
ENSG00000074047.16	GLI2	GLI family zinc finger 2	-0.274373	0.00160015	0.00615907	protein_coding
ENSG00000074054.13	CLASP1	cytoplasmic linker associated protein 1	-0.119023	0.202502	0.365679	protein_coding
ENSG00000074071.9	MRPS34	mitochondrial ribosomal protein S34	0.176623	0.0790774	0.175068	protein_coding
ENSG00000074181.4	NOTCH3	notch 3	-0.605925	1.78e-12	2.24e-11	protein_coding
ENSG00000074201.4	CLNS1A	chloride nucleotide-sensitive channel 1A	0.123535	0.073126	0.164307	protein_coding
ENSG00000074211.9	PPP2R2C	protein phosphatase 2 regulatory subunit Bgamma	-1.26121	0.000400032	0.00176288	protein_coding
ENSG00000074219.9	TEAD2	TEA domain transcription factor 2	0.405879	2.31e-06	1.51e-05	protein_coding
ENSG00000074266.13	EED	embryonic ectoderm development	-0.290107	0.00271807	0.00991631	protein_coding
ENSG00000074276.6	CDHR2	cadherin related family member 2	-0.333614	0.212062	NA	protein_coding
ENSG00000074317.6	SNCB	synuclein beta	-0.193432	0.276946	NA	protein_coding
ENSG00000074319.8	TSG101	tumor susceptibility 101	-0.0951086	0.213518	0.379967	protein_coding
ENSG00000074356.12	C17orf85	NA	0.223179	0.00187506	0.00709041	protein_coding
ENSG00000074370.13	ATP2A3	ATPase sarcoplasmic/endoplasmic reticulum Ca2+ transporting 3	-0.0123426	0.961585	0.980306	protein_coding
ENSG00000074410.9	CA12	carbonic anhydrase 12	1.41309	2.92e-32	1.08e-30	protein_coding
ENSG00000074416.9	MGLL	monoglyceride lipase	0.599349	2.98e-12	3.67e-11	protein_coding
ENSG00000074527.7	NTN4	netrin 4	-0.0162061	0.803409	0.896969	protein_coding
ENSG00000074582.8	BCS1L	BCS1 homolog, ubiquinol-cytochrome c reductase complex chaperone	0.231156	0.0495201	0.119655	protein_coding
ENSG00000074590.9	NUAK1	NUAK family kinase 1	0.0269115	0.758591	0.869457	protein_coding
ENSG00000074603.14	DPP8	dipeptidyl peptidase 8	-0.155212	0.0524603	0.125428	protein_coding
ENSG00000074621.9	SLC24A1	solute carrier family 24 member 1	-0.0695578	0.465291	0.65162	protein_coding
ENSG00000074657.9	ZNF532	zinc finger protein 532	0.0150567	0.869093	0.933515	protein_coding
ENSG00000074660.11	SCARF1	scavenger receptor class F member 1	-0.191846	0.578741	0.744633	protein_coding
ENSG00000074695.5	LMAN1	lectin, mannose binding 1	0.04405	0.489001	0.672187	protein_coding
ENSG00000074696.8	PTPLAD1	NA	-0.470393	1.98e-13	2.69e-12	protein_coding
ENSG00000074706.9	IPCEF1	interaction protein for cytohesin exchange factors 1	0.22782	0.483893	0.668022	protein_coding
ENSG00000074755.10	ZZEF1	zinc finger ZZ-type and EF-hand domain containing 1	-0.376492	0.000254741	0.0011744	protein_coding
ENSG00000074771.3	NOX3	NADPH oxidase 3	NA	NA	NA	protein_coding
ENSG00000074800.9	ENO1	enolase 1	0.542916	1.73e-07	1.33e-06	protein_coding
ENSG00000074803.13	SLC12A1	solute carrier family 12 member 1	NA	NA	NA	protein_coding
ENSG00000074842.3	C19orf10	NA	-0.502845	2.38e-08	2.03e-07	protein_coding
ENSG00000074855.6	ANO8	anoctamin 8	0.402705	0.00176858	0.00673457	protein_coding
ENSG00000074935.9	TUBE1	tubulin epsilon 1	0.338709	0.00596512	0.0198439	protein_coding
ENSG00000074964.12	ARHGEF10L	Rho guanine nucleotide exchange factor 10 like	-0.143456	0.113367	0.233188	protein_coding
ENSG00000074966.6	TXK	TXK tyrosine kinase	-0.904968	0.0122419	0.0370433	protein_coding
ENSG00000075035.5	WSCD2	WSC domain containing 2	0.00103875	0.99389	NA	protein_coding
ENSG00000075043.12	KCNQ2	potassium voltage-gated channel subfamily Q member 2	NA	NA	NA	protein_coding
ENSG00000075073.10	TACR2	tachykinin receptor 2	-0.846803	0.0198691	0.0558833	protein_coding
ENSG00000075089.5	ACTR6	ARP6 actin-related protein 6 homolog	0.0465627	0.762279	0.872143	protein_coding
ENSG00000075131.5	TIPIN	TIMELESS interacting protein	0.0805536	0.572905	0.740823	protein_coding
ENSG00000075142.9	SRI	sorcin	0.0817542	0.299509	0.483202	protein_coding
ENSG00000075151.15	EIF4G3	eukaryotic translation initiation factor 4 gamma 3	-0.327896	3.13e-05	0.000171048	protein_coding
ENSG00000075188.4	NUP37	nucleoporin 37	0.329738	0.0173027	0.0497326	protein_coding
ENSG00000075213.5	SEMA3A	semaphorin 3A	-2.61514	5.34e-116	1.9e-113	protein_coding
ENSG00000075218.14	GTSE1	G2 and S-phase expressed 1	1.77934	1.89e-33	7.4e-32	protein_coding
ENSG00000075223.9	SEMA3C	semaphorin 3C	-2.35754	5.29e-141	2.52e-138	protein_coding
ENSG00000075234.12	TTC38	tetratricopeptide repeat domain 38	0.277974	0.00494177	0.0168371	protein_coding
ENSG00000075239.9	ACAT1	acetyl-CoA acetyltransferase 1	0.149537	0.0681411	0.155334	protein_coding
ENSG00000075240.12	GRAMD4	GRAM domain containing 4	-0.338827	0.00578298	0.0193134	protein_coding
ENSG00000075275.12	CELSR1	cadherin EGF LAG seven-pass G-type receptor 1	-1.63114	1.16e-66	1.32e-64	protein_coding
ENSG00000075290.7	WNT8B	Wnt family member 8B	-0.0828108	0.41046	NA	protein_coding
ENSG00000075292.14	ZNF638	zinc finger protein 638	-0.00712338	0.899992	0.949865	protein_coding
ENSG00000075303.8	SLC25A40	solute carrier family 25 member 40	0.259816	0.00627374	0.0207157	protein_coding
ENSG00000075336.7	TIMM21	translocase of inner mitochondrial membrane 21	-0.214957	0.0325494	0.0847896	protein_coding
ENSG00000075340.17	ADD2	adducin 2	0.000510549	0.997513	NA	protein_coding
ENSG00000075388.2	FGF4	fibroblast growth factor 4	NA	NA	NA	protein_coding
ENSG00000075391.12	RASAL2	RAS protein activator like 2	-7.63e-05	0.999388	0.999759	protein_coding
ENSG00000075399.8	VPS9D1	VPS9 domain containing 1	0.356531	5.39e-05	0.000282701	protein_coding
ENSG00000075407.12	ZNF37A	zinc finger protein 37A	-0.022394	0.796887	0.893226	protein_coding
ENSG00000075413.13	MARK3	microtubule affinity regulating kinase 3	0.135458	0.0355321	0.0910932	protein_coding
ENSG00000075415.8	SLC25A3	solute carrier family 25 member 3	0.438938	1.74e-14	2.56e-13	protein_coding
ENSG00000075420.8	FNDC3B	fibronectin type III domain containing 3B	-0.337098	8.19e-05	0.000414911	protein_coding
ENSG00000075426.7	FOSL2	FOS like 2, AP-1 transcription factor subunit	0.377461	1.52e-05	8.76e-05	protein_coding
ENSG00000075429.4	CACNG5	calcium voltage-gated channel auxiliary subunit gamma 5	NA	NA	NA	protein_coding
ENSG00000075461.5	CACNG4	calcium voltage-gated channel auxiliary subunit gamma 4	0.168529	0.591457	0.754486	protein_coding
ENSG00000075539.9	FRYL	FRY like transcription coactivator	-0.43636	0.00061739	0.00261831	protein_coding
ENSG00000075568.12	TMEM131	transmembrane protein 131	-0.317812	1.64e-05	9.39e-05	protein_coding
ENSG00000075618.13	FSCN1	fascin actin-bundling protein 1	0.442072	1.95e-05	0.000110256	protein_coding
ENSG00000075624.9	ACTB	actin beta	0.688254	2.88e-14	4.19e-13	protein_coding
ENSG00000075643.5	MOCOS	molybdenum cofactor sulfurase	1.20205	4.23e-40	2.11e-38	protein_coding
ENSG00000075651.11	PLD1	phospholipase D1	0.637265	1.21e-12	1.54e-11	protein_coding
ENSG00000075673.7	ATP12A	ATPase H+/K+ transporting non-gastric alpha2 subunit	-0.0868067	0.394197	NA	protein_coding
ENSG00000075702.11	WDR62	WD repeat domain 62	1.59738	1.17e-15	1.85e-14	protein_coding
ENSG00000075711.16	DLG1	discs large MAGUK scaffold protein 1	0.186776	0.000821103	0.00337896	protein_coding
ENSG00000075785.8	RAB7A	RAB7A, member RAS oncogene family	-0.21244	0.00208093	0.00780857	protein_coding
ENSG00000075790.6	BCAP29	B-cell receptor associated protein 29	-0.301705	0.001045	0.00420578	protein_coding
ENSG00000075826.12	SEC31B	SEC31 homolog B, COPII coat complex component	0.0378122	0.916986	0.959317	protein_coding
ENSG00000075856.7	SART3	squamous cell carcinoma antigen recognized by T-cells 3	0.0860852	0.319188	0.505415	protein_coding
ENSG00000075884.8	ARHGAP15	Rho GTPase activating protein 15	NA	NA	NA	protein_coding
ENSG00000075886.10	TUBA3D	tubulin alpha 3d	NA	NA	NA	protein_coding
ENSG00000075891.17	PAX2	paired box 2	NA	NA	NA	protein_coding
ENSG00000075914.8	EXOSC7	exosome component 7	0.0665206	0.442058	0.630904	protein_coding
ENSG00000075945.8	KIFAP3	kinesin associated protein 3	-0.381338	1.68e-06	1.13e-05	protein_coding
ENSG00000075975.11	MKRN2	makorin ring finger protein 2	0.176333	0.0238282	0.0650749	protein_coding
ENSG00000076003.4	MCM6	minichromosome maintenance complex component 6	0.0644813	0.417085	0.606463	protein_coding
ENSG00000076043.5	REXO2	RNA exonuclease 2	0.266215	0.000470159	0.00204024	protein_coding
ENSG00000076053.6	RBM7	RNA binding motif protein 7	0.507824	1.63e-06	1.1e-05	protein_coding
ENSG00000076067.7	RBMS2	RNA binding motif single stranded interacting protein 2	-0.0952588	0.260655	0.439301	protein_coding
ENSG00000076108.7	BAZ2A	bromodomain adjacent to zinc finger domain 2A	-0.0426488	0.591695	0.754559	protein_coding
ENSG00000076201.10	PTPN23	protein tyrosine phosphatase, non-receptor type 23	-0.218918	0.0129426	0.0388695	protein_coding
ENSG00000076242.10	MLH1	mutL homolog 1	-0.150535	0.0698643	0.158287	protein_coding
ENSG00000076248.6	UNG	uracil DNA glycosylase	-0.0823411	0.426204	0.61559	protein_coding
ENSG00000076258.5	FMO4	flavin containing monooxygenase 4	-0.292786	0.0115244	0.0352071	protein_coding
ENSG00000076321.6	KLHL20	kelch like family member 20	-0.415299	1.73e-08	1.5e-07	protein_coding
ENSG00000076344.11	RGS11	regulator of G-protein signaling 11	-1.06001	4.58e-06	2.87e-05	protein_coding
ENSG00000076351.8	SLC46A1	solute carrier family 46 member 1	-0.657856	0.00230152	0.00855436	protein_coding
ENSG00000076356.6	PLXNA2	plexin A2	0.0739729	0.425675	0.615188	protein_coding
ENSG00000076382.11	SPAG5	sperm associated antigen 5	1.68852	2.73e-15	4.2e-14	protein_coding
ENSG00000076513.12	ANKRD13A	ankyrin repeat domain 13A	0.256335	0.000718236	0.00300041	protein_coding
ENSG00000076554.11	TPD52	tumor protein D52	0.237324	0.12174	0.246705	protein_coding
ENSG00000076555.11	ACACB	acetyl-CoA carboxylase beta	-0.183363	0.252137	0.429602	protein_coding
ENSG00000076604.10	TRAF4	TNF receptor associated factor 4	-0.101359	0.244191	0.420125	protein_coding
ENSG00000076641.4	PAG1	phosphoprotein membrane anchor with glycosphingolipid microdomains 1	-0.404693	0.000386612	0.00170951	protein_coding
ENSG00000076650.2	GPATCH1	G-patch domain containing 1	-0.168828	0.124798	0.251807	protein_coding
ENSG00000076662.5	ICAM3	intercellular adhesion molecule 3	-0.330474	0.0540419	0.128582	protein_coding
ENSG00000076685.14	NT5C2	5'-nucleotidase, cytosolic II	0.117433	0.0374216	0.0950167	protein_coding
ENSG00000076706.10	MCAM	melanoma cell adhesion molecule	2.2268	4.25e-63	4.22e-61	protein_coding
ENSG00000076716.7	GPC4	glypican 4	-1.49741	2.08e-47	1.35e-45	protein_coding
ENSG00000076770.10	MBNL3	muscleblind like splicing regulator 3	0.645784	0.00504441	0.0171569	protein_coding
ENSG00000076826.5	CAMSAP3	calmodulin regulated spectrin associated protein family member 3	-0.0218255	0.896555	NA	protein_coding
ENSG00000076864.15	RAP1GAP	RAP1 GTPase activating protein	0.0565066	0.873479	0.935788	protein_coding
ENSG00000076924.7	XAB2	XPA binding protein 2	0.0874569	0.426017	0.615432	protein_coding
ENSG00000076928.13	ARHGEF1	Rho guanine nucleotide exchange factor 1	0.365015	1.43e-05	8.27e-05	protein_coding
ENSG00000076944.10	STXBP2	syntaxin binding protein 2	1.24703	1.61e-17	2.86e-16	protein_coding
ENSG00000076984.13	MAP2K7	mitogen-activated protein kinase kinase 7	-0.159862	0.0415063	0.103549	protein_coding
ENSG00000077009.9	NMRK2	nicotinamide riboside kinase 2	NA	NA	NA	protein_coding
ENSG00000077044.5	DGKD	diacylglycerol kinase delta	-0.706659	5.81e-09	5.33e-08	protein_coding
ENSG00000077063.6	CTTNBP2	cortactin binding protein 2	0.81181	0.0179238	0.0512511	protein_coding
ENSG00000077080.5	ACTL6B	actin like 6B	-0.11807	0.314856	NA	protein_coding
ENSG00000077092.14	RARB	retinoic acid receptor beta	3.16456	1.57e-77	2.48e-75	protein_coding
ENSG00000077097.9	TOP2B	topoisomerase (DNA) II beta	0.237118	0.010316	0.0319515	protein_coding
ENSG00000077147.10	TM9SF3	transmembrane 9 superfamily member 3	-0.232765	0.000266243	0.00122139	protein_coding
ENSG00000077150.13	NFKB2	nuclear factor kappa B subunit 2	0.434827	2.55e-05	0.000141063	protein_coding
ENSG00000077152.5	UBE2T	ubiquitin conjugating enzyme E2 T	0.774572	0.00149309	0.00578221	protein_coding
ENSG00000077157.15	PPP1R12B	protein phosphatase 1 regulatory subunit 12B	1.19326	1.63e-33	6.4e-32	protein_coding
ENSG00000077232.11	DNAJC10	DnaJ heat shock protein family (Hsp40) member C10	-0.164555	0.0105475	0.0325807	protein_coding
ENSG00000077235.13	GTF3C1	general transcription factor IIIC subunit 1	-0.339493	0.000245811	0.0011359	protein_coding
ENSG00000077238.9	IL4R	interleukin 4 receptor	0.736055	3.59e-10	3.7e-09	protein_coding
ENSG00000077254.10	USP33	ubiquitin specific peptidase 33	0.0560578	0.425184	0.614661	protein_coding
ENSG00000077264.9	PAK3	p21 (RAC1) activated kinase 3	1.13765	0.000907526	0.00370425	protein_coding
ENSG00000077274.7	CAPN6	calpain 6	-0.277164	0.376742	0.566005	protein_coding
ENSG00000077279.12	DCX	doublecortin	-0.108825	0.335768	NA	protein_coding
ENSG00000077312.4	SNRPA	small nuclear ribonucleoprotein polypeptide A	0.853109	2.3e-15	3.55e-14	protein_coding
ENSG00000077327.11	SPAG6	sperm associated antigen 6	NA	NA	NA	protein_coding
ENSG00000077348.4	EXOSC5	exosome component 5	0.362794	0.0533034	0.127087	protein_coding
ENSG00000077380.11	DYNC1I2	dynein cytoplasmic 1 intermediate chain 2	-0.357985	2.94e-06	1.89e-05	protein_coding
ENSG00000077420.11	APBB1IP	amyloid beta precursor protein binding family B member 1 interacting protein	-0.591991	1.65e-11	1.89e-10	protein_coding
ENSG00000077454.11	LRCH4	leucine rich repeats and calponin homology domain containing 4	0.106812	0.205714	0.370046	protein_coding
ENSG00000077458.8	FAM76B	family with sequence similarity 76 member B	0.547705	0.00332531	0.011847	protein_coding
ENSG00000077463.10	SIRT6	sirtuin 6	0.0611468	0.585041	0.749391	protein_coding
ENSG00000077498.8	TYR	tyrosinase	NA	NA	NA	protein_coding
ENSG00000077514.4	POLD3	DNA polymerase delta 3, accessory subunit	0.0706462	0.492755	0.6754	protein_coding
ENSG00000077522.8	ACTN2	actinin alpha 2	-0.202721	0.18085	NA	protein_coding
ENSG00000077549.13	CAPZB	capping actin protein of muscle Z-line beta subunit	0.219378	0.00407123	0.0141895	protein_coding
ENSG00000077585.9	GPR137B	G protein-coupled receptor 137B	-0.378233	4.56e-05	0.000242769	protein_coding
ENSG00000077616.6	NAALAD2	N-acetylated alpha-linked acidic dipeptidase 2	-0.438568	0.226076	0.396248	protein_coding
ENSG00000077684.11	PHF17	NA	0.620454	1.88e-19	3.74e-18	protein_coding
ENSG00000077713.13	SLC25A43	solute carrier family 25 member 43	0.136774	0.0510771	0.122826	protein_coding
ENSG00000077721.11	UBE2A	ubiquitin conjugating enzyme E2 A	-0.187515	0.0136011	0.0405117	protein_coding
ENSG00000077782.15	FGFR1	fibroblast growth factor receptor 1	-0.300986	7.38e-05	0.000376993	protein_coding
ENSG00000077800.7	FKBP6	FK506 binding protein 6	NA	NA	NA	protein_coding
ENSG00000077809.8	GTF2I	general transcription factor IIi	-0.135626	0.0825869	0.181057	protein_coding
ENSG00000077935.12	SMC1B	structural maintenance of chromosomes 1B	0.154798	0.561632	NA	protein_coding
ENSG00000077942.13	FBLN1	fibulin 1	-0.504272	9.71e-07	6.79e-06	protein_coding
ENSG00000077943.7	ITGA8	integrin subunit alpha 8	0.397621	0.000782903	0.00323741	protein_coding
ENSG00000077984.4	CST7	cystatin F	0	1	NA	protein_coding
ENSG00000078018.15	MAP2	microtubule associated protein 2	-1.19724	1.4e-38	6.58e-37	protein_coding
ENSG00000078043.11	PIAS2	protein inhibitor of activated STAT 2	-0.299941	0.000203833	0.00095751	protein_coding
ENSG00000078053.12	AMPH	amphiphysin	2.18423	1.14e-30	3.87e-29	protein_coding
ENSG00000078061.8	ARAF	A-Raf proto-oncogene, serine/threonine kinase	-0.166	0.0390075	0.0982664	protein_coding
ENSG00000078070.7	MCCC1	methylcrotonoyl-CoA carboxylase 1	-0.0910263	0.327942	0.515566	protein_coding
ENSG00000078081.3	LAMP3	lysosomal associated membrane protein 3	-0.927885	0.00800667	0.0256355	protein_coding
ENSG00000078098.9	FAP	fibroblast activation protein alpha	0.1272	0.10769	0.223457	protein_coding
ENSG00000078114.14	NEBL	nebulette	-0.0718016	0.764513	NA	protein_coding
ENSG00000078124.7	ACER3	alkaline ceramidase 3	0.40403	0.000732472	0.00305012	protein_coding
ENSG00000078140.9	UBE2K	ubiquitin conjugating enzyme E2 K	0.214773	0.00187158	0.0070786	protein_coding
ENSG00000078142.7	PIK3C3	phosphatidylinositol 3-kinase catalytic subunit type 3	-0.289766	4.77e-07	3.47e-06	protein_coding
ENSG00000078177.9	N4BP2	NEDD4 binding protein 2	0.910013	2.5e-19	4.92e-18	protein_coding
ENSG00000078237.4	C12orf5	NA	-0.78068	4.85e-20	9.95e-19	protein_coding
ENSG00000078246.11	TULP3	tubby like protein 3	0.0988254	0.214297	0.381006	protein_coding
ENSG00000078269.9	SYNJ2	synaptojanin 2	-0.0892606	0.314043	0.499611	protein_coding
ENSG00000078295.11	ADCY2	adenylate cyclase 2	-0.136998	0.277186	NA	protein_coding
ENSG00000078304.15	PPP2R5C	protein phosphatase 2 regulatory subunit B'gamma	0.033266	0.5641	0.734043	protein_coding
ENSG00000078328.15	RBFOX1	RNA binding protein, fox-1 homolog 1	0.0420405	0.731385	NA	protein_coding
ENSG00000078369.13	GNB1	G protein subunit beta 1	-0.0378763	0.624509	0.778906	protein_coding
ENSG00000078399.11	HOXA9	homeobox A9	0.513488	6.79e-05	0.000349355	protein_coding
ENSG00000078401.6	EDN1	endothelin 1	-0.56675	1.05e-05	6.21e-05	protein_coding
ENSG00000078403.12	MLLT10	myeloid/lymphoid or mixed-lineage leukemia; translocated to, 10	0.262085	0.00508223	0.0172616	protein_coding
ENSG00000078487.13	ZCWPW1	zinc finger CW-type and PWWP domain containing 1	-0.526515	0.000965374	0.00391426	protein_coding
ENSG00000078549.10	ADCYAP1R1	ADCYAP receptor type I	-0.248536	0.135201	NA	protein_coding
ENSG00000078579.8	FGF20	fibroblast growth factor 20	0.769205	0.0316988	0.0830487	protein_coding
ENSG00000078589.8	P2RY10	purinergic receptor P2Y10	NA	NA	NA	protein_coding
ENSG00000078596.6	ITM2A	integral membrane protein 2A	NA	NA	NA	protein_coding
ENSG00000078618.15	NRD1	NA	0.314545	1.4e-06	9.52e-06	protein_coding
ENSG00000078668.9	VDAC3	voltage dependent anion channel 3	0.166639	0.169753	0.320263	protein_coding
ENSG00000078674.13	PCM1	pericentriolar material 1	-0.0737851	0.380174	0.569251	protein_coding
ENSG00000078687.12	TNRC6C	trinucleotide repeat containing 6C	0.285981	0.0109414	0.033649	protein_coding
ENSG00000078699.16	CBFA2T2	CBFA2/RUNX1 translocation partner 2	-0.00987245	0.927009	0.963109	protein_coding
ENSG00000078725.8	DBC1	NA	-0.182465	0.501187	0.682275	protein_coding
ENSG00000078747.8	ITCH	itchy E3 ubiquitin protein ligase	-0.0496358	0.459089	0.645732	protein_coding
ENSG00000078795.12	PKD2L2	polycystin 2 like 2, transient receptor potential cation channel	0.165552	0.500533	NA	protein_coding
ENSG00000078804.8	TP53INP2	tumor protein p53 inducible nuclear protein 2	-0.714167	7.72e-16	1.23e-14	protein_coding
ENSG00000078808.12	SDF4	stromal cell derived factor 4	-0.663954	1.96e-11	2.24e-10	protein_coding
ENSG00000078814.11	MYH7B	myosin heavy chain 7B	0.170298	0.613106	0.770668	protein_coding
ENSG00000078898.6	BPIFB2	BPI fold containing family B member 2	NA	NA	NA	protein_coding
ENSG00000078900.10	TP73	tumor protein p73	-0.210636	0.332693	NA	protein_coding
ENSG00000078902.11	TOLLIP	toll interacting protein	-0.459273	2.03e-05	0.00011466	protein_coding
ENSG00000078967.7	UBE2D4	ubiquitin conjugating enzyme E2 D4 (putative)	-0.451521	4.21e-05	0.000225031	protein_coding
ENSG00000079101.12	CLUL1	clusterin like 1	1.18328	1.07e-19	2.16e-18	protein_coding
ENSG00000079102.12	RUNX1T1	RUNX1 translocation partner 1	0.133243	0.106411	0.221274	protein_coding
ENSG00000079112.5	CDH17	cadherin 17	-0.0736956	0.724276	NA	protein_coding
ENSG00000079134.7	THOC1	THO complex 1	0.270527	0.0300237	0.0792751	protein_coding
ENSG00000079150.13	FKBP7	FK506 binding protein 7	-0.139566	0.0875778	0.189405	protein_coding
ENSG00000079156.12	OSBPL6	oxysterol binding protein like 6	-0.683546	1.24e-06	8.47e-06	protein_coding
ENSG00000079215.9	SLC1A3	solute carrier family 1 member 3	1.05731	0.00349639	0.0123889	protein_coding
ENSG00000079246.11	XRCC5	X-ray repair cross complementing 5	-0.0708492	0.321064	0.507442	protein_coding
ENSG00000079257.3	LXN	latexin	0.914241	8.96e-12	1.06e-10	protein_coding
ENSG00000079263.14	SP140	SP140 nuclear body protein	0.107381	0.704623	NA	protein_coding
ENSG00000079277.15	MKNK1	MAP kinase interacting serine/threonine kinase 1	-0.105668	0.235548	0.408879	protein_coding
ENSG00000079308.12	TNS1	tensin 1	-0.377481	0.00117039	0.00465398	protein_coding
ENSG00000079313.7	REXO1	RNA exonuclease 1 homolog	0.0200273	0.855812	0.926542	protein_coding
ENSG00000079332.9	SAR1A	secretion associated Ras related GTPase 1A	-0.0488865	0.454191	0.641256	protein_coding
ENSG00000079335.13	CDC14A	cell division cycle 14A	-1.58573	5.28e-45	3.17e-43	protein_coding
ENSG00000079337.11	RAPGEF3	Rap guanine nucleotide exchange factor 3	0.138674	0.456922	0.643581	protein_coding
ENSG00000079385.17	CEACAM1	carcinoembryonic antigen related cell adhesion molecule 1	0.106061	0.656716	NA	protein_coding
ENSG00000079387.9	SENP1	SUMO1/sentrin specific peptidase 1	0.150598	0.104439	0.218285	protein_coding
ENSG00000079393.16	DUSP13	dual specificity phosphatase 13	NA	NA	NA	protein_coding
ENSG00000079432.3	CIC	capicua transcriptional repressor	-0.243782	0.0256404	0.0692991	protein_coding
ENSG00000079435.5	LIPE	lipase E, hormone sensitive type	0.531422	0.0126527	0.0381098	protein_coding
ENSG00000079459.8	FDFT1	farnesyl-diphosphate farnesyltransferase 1	-0.173236	0.0168132	0.0485865	protein_coding
ENSG00000079462.3	PAFAH1B3	platelet activating factor acetylhydrolase 1b catalytic subunit 3	0.569555	0.000799951	0.00330024	protein_coding
ENSG00000079482.11	OPHN1	oligophrenin 1	-0.0935767	0.357052	0.545821	protein_coding
ENSG00000079557.3	AFM	afamin	NA	NA	NA	protein_coding
ENSG00000079616.8	KIF22	kinesin family member 22	0.349874	0.00280789	0.0102135	protein_coding
ENSG00000079689.9	SCGN	secretagogin, EF-hand calcium binding protein	NA	NA	NA	protein_coding
ENSG00000079691.15	LRRC16A	NA	-0.0253743	0.774456	0.879424	protein_coding
ENSG00000079739.11	PGM1	phosphoglucomutase 1	0.216993	0.0216251	0.0600533	protein_coding
ENSG00000079785.10	DDX1	DEAD-box helicase 1	0.158805	0.0217381	0.0603088	protein_coding
ENSG00000079805.12	DNM2	dynamin 2	-0.156931	0.0762933	0.170097	protein_coding
ENSG00000079819.12	EPB41L2	erythrocyte membrane protein band 4.1 like 2	0.193055	0.0024328	0.00898434	protein_coding
ENSG00000079841.14	RIMS1	regulating synaptic membrane exocytosis 1	-0.729445	0.000166196	0.000794625	protein_coding
ENSG00000079931.10	MOXD1	monooxygenase DBH like 1	-1.72842	1.33e-138	6.08e-136	protein_coding
ENSG00000079950.9	STX7	syntaxin 7	-0.288226	0.00365945	0.012892	protein_coding
ENSG00000079974.13	RABL2B	RAB, member of RAS oncogene family-like 2B	-0.253183	0.0827679	0.181393	protein_coding
ENSG00000079999.9	KEAP1	kelch like ECH associated protein 1	-0.0663518	0.52899	0.705849	protein_coding
ENSG00000080007.6	DDX43	DEAD-box helicase 43	2.12582	2.76e-10	2.88e-09	protein_coding
ENSG00000080031.5	PTPRH	protein tyrosine phosphatase, receptor type H	0.963141	3.31e-11	3.73e-10	protein_coding
ENSG00000080166.11	DCT	dopachrome tautomerase	-0.493412	0.0953472	NA	protein_coding
ENSG00000080189.10	SLC35C2	solute carrier family 35 member C2	0.357828	2.27e-05	0.00012679	protein_coding
ENSG00000080200.5	CRYBG3	crystallin beta-gamma domain containing 3	-0.162226	0.18221	0.338045	protein_coding
ENSG00000080224.13	EPHA6	EPH receptor A6	NA	NA	NA	protein_coding
ENSG00000080293.5	SCTR	secretin receptor	NA	NA	NA	protein_coding
ENSG00000080298.11	RFX3	regulatory factor X3	0.330905	0.00915931	0.0287461	protein_coding
ENSG00000080345.12	RIF1	replication timing regulatory factor 1	-0.0809298	0.489889	0.673074	protein_coding
ENSG00000080371.4	RAB21	RAB21, member RAS oncogene family	-0.538098	2.44e-11	2.78e-10	protein_coding
ENSG00000080493.9	SLC4A4	solute carrier family 4 member 4	-0.141076	0.118739	0.2419	protein_coding
ENSG00000080503.15	SMARCA2	SWI/SNF related, matrix associated, actin dependent regulator of chromatin, subfamily a, member 2	0.38378	5.12e-05	0.000269752	protein_coding
ENSG00000080511.2	RDH8	retinol dehydrogenase 8 (all-trans)	-0.03235	0.788223	NA	protein_coding
ENSG00000080546.9	SESN1	sestrin 1	-0.494771	3.05e-10	3.17e-09	protein_coding
ENSG00000080561.9	MID2	midline 2	-0.0475798	0.621283	0.776679	protein_coding
ENSG00000080572.8	PIH1D3	PIH1 domain containing 3	NA	NA	NA	protein_coding
ENSG00000080573.6	COL5A3	collagen type V alpha 3 chain	0.973148	3.69e-38	1.71e-36	protein_coding
ENSG00000080603.12	SRCAP	Snf2 related CREBBP activator protein	-0.302667	0.00667066	0.0218861	protein_coding
ENSG00000080608.9	KIAA0020	NA	0.0101492	0.899781	0.949816	protein_coding
ENSG00000080618.9	CPB2	carboxypeptidase B2	NA	NA	NA	protein_coding
ENSG00000080644.11	CHRNA3	cholinergic receptor nicotinic alpha 3 subunit	NA	NA	NA	protein_coding
ENSG00000080709.10	KCNN2	potassium calcium-activated channel subfamily N member 2	0.0615673	0.590742	0.75408	protein_coding
ENSG00000080802.14	CNOT4	CCR4-NOT transcription complex subunit 4	-0.302102	0.0006947	0.00291266	protein_coding
ENSG00000080815.14	PSEN1	presenilin 1	0.113396	0.137425	0.271605	protein_coding
ENSG00000080819.2	CPOX	coproporphyrinogen oxidase	-0.368454	8.54e-06	5.11e-05	protein_coding
ENSG00000080822.12	CLDND1	claudin domain containing 1	0.071848	0.592721	0.755473	protein_coding
ENSG00000080823.17	MOK	MOK protein kinase	-0.19919	0.201123	0.363895	protein_coding
ENSG00000080824.14	HSP90AA1	heat shock protein 90 alpha family class A member 1	-0.402836	5.04e-09	4.64e-08	protein_coding
ENSG00000080839.7	RBL1	RB transcriptional corepressor like 1	0.432188	0.00130569	0.00513055	protein_coding
ENSG00000080845.13	DLGAP4	DLG associated protein 4	-0.228547	0.0118793	0.036151	protein_coding
ENSG00000080854.10	IGSF9B	immunoglobulin superfamily member 9B	0.227922	0.436779	0.625696	protein_coding
ENSG00000080910.6	CFHR2	complement factor H related 2	NA	NA	NA	protein_coding
ENSG00000080986.7	NDC80	NDC80, kinetochore complex component	2.18637	2.14e-44	1.26e-42	protein_coding
ENSG00000081014.6	AP4E1	adaptor related protein complex 4 epsilon 1 subunit	-0.112027	0.25377	0.431297	protein_coding
ENSG00000081019.9	RSBN1	round spermatid basic protein 1	-0.0520363	0.551956	0.724522	protein_coding
ENSG00000081026.14	MAGI3	membrane associated guanylate kinase, WW and PDZ domain containing 3	-0.0243687	0.812497	0.902351	protein_coding
ENSG00000081041.8	CXCL2	C-X-C motif chemokine ligand 2	-0.127358	0.71132	0.837688	protein_coding
ENSG00000081051.3	AFP	alpha fetoprotein	-0.170716	0.583149	0.747671	protein_coding
ENSG00000081052.10	COL4A4	collagen type IV alpha 4 chain	0.268882	0.280804	0.462435	protein_coding
ENSG00000081059.15	TCF7	transcription factor 7 (T-cell specific, HMG-box)	1.22364	3.11e-07	2.31e-06	protein_coding
ENSG00000081087.10	OSTM1	osteopetrosis associated transmembrane protein 1	-0.804029	1.1e-23	2.73e-22	protein_coding
ENSG00000081138.9	CDH7	cadherin 7	NA	NA	NA	protein_coding
ENSG00000081148.11	IMPG2	interphotoreceptor matrix proteoglycan 2	-0.765817	0.0194921	0.0550049	protein_coding
ENSG00000081154.7	PCNP	PEST proteolytic signal containing nuclear protein	-0.0458079	0.638967	0.788661	protein_coding
ENSG00000081177.14	EXD2	exonuclease 3'-5' domain containing 2	-0.224927	0.0231785	0.0636365	protein_coding
ENSG00000081181.3	ARG2	arginase 2	1.25475	1.85e-09	1.79e-08	protein_coding
ENSG00000081189.9	MEF2C	myocyte enhancer factor 2C	0.361108	0.0271257	0.0726121	protein_coding
ENSG00000081237.14	PTPRC	protein tyrosine phosphatase, receptor type C	-1.19772	4.04e-06	2.56e-05	protein_coding
ENSG00000081248.6	CACNA1S	calcium voltage-gated channel subunit alpha1 S	NA	NA	NA	protein_coding
ENSG00000081277.7	PKP1	plakophilin 1	-0.591758	0.0369428	NA	protein_coding
ENSG00000081307.8	UBA5	ubiquitin like modifier activating enzyme 5	-0.616321	8.19e-15	1.24e-13	protein_coding
ENSG00000081320.6	STK17B	serine/threonine kinase 17b	0.388161	3.43e-09	3.22e-08	protein_coding
ENSG00000081377.12	CDC14B	cell division cycle 14B	0.155626	0.0561388	0.13254	protein_coding
ENSG00000081386.8	ZNF510	zinc finger protein 510	-0.250567	0.00819286	0.0261403	protein_coding
ENSG00000081479.8	LRP2	LDL receptor related protein 2	-1.9825	5.37e-10	5.43e-09	protein_coding
ENSG00000081665.9	ZNF506	zinc finger protein 506	-0.245936	0.026637	0.0714994	protein_coding
ENSG00000081692.8	JMJD4	jumonji domain containing 4	0.395604	2.82e-05	0.00015486	protein_coding
ENSG00000081721.6	DUSP12	dual specificity phosphatase 12	0.00744267	0.952051	0.976381	protein_coding
ENSG00000081760.12	AACS	acetoacetyl-CoA synthetase	0.200187	0.00696628	0.0227304	protein_coding
ENSG00000081791.4	KIAA0141	KIAA0141	-0.000717377	0.992233	0.996354	protein_coding
ENSG00000081800.4	SLC13A1	solute carrier family 13 member 1	NA	NA	NA	protein_coding
ENSG00000081803.11	CADPS2	calcium dependent secretion activator 2	2.94769	2.19e-23	5.36e-22	protein_coding
ENSG00000081818.1	PCDHB4	protocadherin beta 4	NA	NA	NA	protein_coding
ENSG00000081842.13	PCDHA6	protocadherin alpha 6	-0.113678	0.324602	NA	protein_coding
ENSG00000081853.13	PCDHGA2	protocadherin gamma subfamily A, 2	-0.827979	9.17e-11	9.96e-10	protein_coding
ENSG00000081870.7	HSPB11	heat shock protein family B (small) member 11	0.333645	0.0515501	0.123766	protein_coding
ENSG00000081913.9	PHLPP1	PH domain and leucine rich repeat protein phosphatase 1	0.724404	1.89e-09	1.83e-08	protein_coding
ENSG00000081923.6	ATP8B1	ATPase phospholipid transporting 8B1	-0.225247	0.0012769	0.00502851	protein_coding
ENSG00000081985.6	IL12RB2	interleukin 12 receptor subunit beta 2	-0.108825	0.335768	NA	protein_coding
ENSG00000082014.12	SMARCD3	SWI/SNF related, matrix associated, actin dependent regulator of chromatin, subfamily d, member 3	-0.108634	0.293281	0.476346	protein_coding
ENSG00000082068.4	WDR70	WD repeat domain 70	0.262494	0.00153512	0.00593327	protein_coding
ENSG00000082074.11	FYB	FYN binding protein	-0.424279	0.154839	0.297729	protein_coding
ENSG00000082126.13	MPP4	membrane palmitoylated protein 4	-0.368612	0.0832308	0.182285	protein_coding
ENSG00000082146.8	STRADB	STE20-related kinase adaptor beta	0.330351	0.000107406	0.000531576	protein_coding
ENSG00000082153.13	BZW1	basic leucine zipper and W2 domains 1	-0.100047	0.198408	0.359946	protein_coding
ENSG00000082175.10	PGR	progesterone receptor	1.18415	0.0010602	0.00425995	protein_coding
ENSG00000082196.15	C1QTNF3	C1q and tumor necrosis factor related protein 3	0.0401233	0.901409	0.950712	protein_coding
ENSG00000082212.7	ME2	malic enzyme 2	-0.109948	0.114579	0.23504	protein_coding
ENSG00000082213.13	C5orf22	chromosome 5 open reading frame 22	-0.0635319	0.441064	0.629991	protein_coding
ENSG00000082258.8	CCNT2	cyclin T2	-0.180332	0.124191	0.250834	protein_coding
ENSG00000082269.12	FAM135A	family with sequence similarity 135 member A	-0.0196662	0.838801	0.918036	protein_coding
ENSG00000082293.8	COL19A1	collagen type XIX alpha 1 chain	-0.572825	0.095166	0.202718	protein_coding
ENSG00000082397.11	EPB41L3	erythrocyte membrane protein band 4.1 like 3	2.4318	2.39e-130	1.04e-127	protein_coding
ENSG00000082438.11	COBLL1	cordon-bleu WH2 repeat protein like 1	-0.774426	2.35e-30	7.87e-29	protein_coding
ENSG00000082458.7	DLG3	discs large MAGUK scaffold protein 3	0.453113	0.000116156	0.000571269	protein_coding
ENSG00000082482.9	KCNK2	potassium two pore domain channel subfamily K member 2	2.38193	1.72e-83	3.18e-81	protein_coding
ENSG00000082497.7	SERTAD4	SERTA domain containing 4	2.27396	2.52e-88	5.36e-86	protein_coding
ENSG00000082512.10	TRAF5	TNF receptor associated factor 5	0.417657	0.00133506	0.00523127	protein_coding
ENSG00000082515.12	MRPL22	mitochondrial ribosomal protein L22	0.457264	0.000404969	0.00178303	protein_coding
ENSG00000082516.8	GEMIN5	gem nuclear organelle associated protein 5	-0.283518	0.00862491	0.0273141	protein_coding
ENSG00000082556.6	OPRK1	opioid receptor kappa 1	NA	NA	NA	protein_coding
ENSG00000082641.11	NFE2L1	nuclear factor, erythroid 2 like 1	-0.24549	0.00117473	0.00467032	protein_coding
ENSG00000082684.10	SEMA5B	semaphorin 5B	-0.112921	0.326314	NA	protein_coding
ENSG00000082701.10	GSK3B	glycogen synthase kinase 3 beta	-0.194878	0.0328451	0.0854006	protein_coding
ENSG00000082781.6	ITGB5	integrin subunit beta 5	-0.648052	9.08e-13	1.17e-11	protein_coding
ENSG00000082805.15	ERC1	ELKS/RAB6-interacting/CAST family member 1	-0.105494	0.370083	0.559328	protein_coding
ENSG00000082898.12	XPO1	exportin 1	0.105806	0.0814285	0.179177	protein_coding
ENSG00000082929.4	C4orf6	NA	NA	NA	NA	protein_coding
ENSG00000082996.14	RNF13	ring finger protein 13	-0.0449356	0.66717	0.808932	protein_coding
ENSG00000083067.17	TRPM3	transient receptor potential cation channel subfamily M member 3	-0.796698	0.0137529	0.0408767	protein_coding
ENSG00000083093.5	PALB2	partner and localizer of BRCA2	-0.161793	0.0772561	0.171878	protein_coding
ENSG00000083097.10	DOPEY1	dopey family member 1	-0.837738	3.8e-31	1.32e-29	protein_coding
ENSG00000083099.6	LYRM2	LYR motif containing 2	-0.0597492	0.428957	0.618341	protein_coding
ENSG00000083123.10	BCKDHB	branched chain keto acid dehydrogenase E1 subunit beta	0.172562	0.0291519	0.0772754	protein_coding
ENSG00000083168.5	KAT6A	lysine acetyltransferase 6A	-0.00979598	0.924557	0.962869	protein_coding
ENSG00000083223.13	ZCCHC6	zinc finger CCHC-type containing 6	0.0896098	0.158609	0.303606	protein_coding
ENSG00000083290.15	ULK2	unc-51 like autophagy activating kinase 2	0.331891	1.63e-06	1.09e-05	protein_coding
ENSG00000083307.6	GRHL2	grainyhead like transcription factor 2	-0.359786	0.127917	NA	protein_coding
ENSG00000083312.13	TNPO1	transportin 1	-0.0357867	0.621706	0.776895	protein_coding
ENSG00000083444.12	PLOD1	procollagen-lysine,2-oxoglutarate 5-dioxygenase 1	-0.411802	2.15e-05	0.000120905	protein_coding
ENSG00000083454.17	P2RX5	purinergic receptor P2X 5	-0.149774	0.565682	0.735515	protein_coding
ENSG00000083457.7	ITGAE	integrin subunit alpha E	-0.0248383	0.94153	0.970878	protein_coding
ENSG00000083520.10	DIS3	DIS3 homolog, exosome endoribonuclease and 3'-5' exoribonuclease	-0.126935	0.0582113	0.136512	protein_coding
ENSG00000083535.11	PIBF1	progesterone immunomodulatory binding factor 1	-0.0550364	0.488773	0.671964	protein_coding
ENSG00000083544.9	TDRD3	tudor domain containing 3	0.0905752	0.338939	0.527227	protein_coding
ENSG00000083635.7	NUFIP1	NUFIP1, FMR1 interacting protein 1	-0.0159098	0.900455	0.950084	protein_coding
ENSG00000083642.14	PDS5B	PDS5 cohesin associated factor B	-0.648663	6.33e-18	1.15e-16	protein_coding
ENSG00000083720.8	OXCT1	3-oxoacid CoA-transferase 1	0.0886974	0.258207	0.436527	protein_coding
ENSG00000083750.8	RRAGB	Ras related GTP binding B	-0.503288	6.39e-09	5.84e-08	protein_coding
ENSG00000083782.3	EPYC	epiphycan	-0.248027	0.301857	NA	protein_coding
ENSG00000083799.13	CYLD	CYLD lysine 63 deubiquitinase	-0.52048	1.17e-08	1.03e-07	protein_coding
ENSG00000083807.5	SLC27A5	solute carrier family 27 member 5	1.20364	7.74e-07	5.46e-06	protein_coding
ENSG00000083812.7	ZNF324	zinc finger protein 324	-0.435768	0.000435398	0.00190416	protein_coding
ENSG00000083814.8	ZNF671	zinc finger protein 671	-0.1607	0.232784	0.405123	protein_coding
ENSG00000083817.8	ZNF416	zinc finger protein 416	-0.216261	0.0682726	0.15558	protein_coding
ENSG00000083828.11	ZNF586	zinc finger protein 586	0.367395	0.00550787	0.0184956	protein_coding
ENSG00000083838.11	ZNF446	zinc finger protein 446	-0.189397	0.181242	0.336775	protein_coding
ENSG00000083842.8	ZNF8	zinc finger protein 8	-0.128885	0.55484	0.726822	protein_coding
ENSG00000083844.6	ZNF264	zinc finger protein 264	-0.405498	1.3e-05	7.6e-05	protein_coding
ENSG00000083845.4	RPS5	ribosomal protein S5	0.431385	4.9e-07	3.56e-06	protein_coding
ENSG00000083857.9	FAT1	FAT atypical cadherin 1	-1.44883	6.71e-10	6.73e-09	protein_coding
ENSG00000083896.8	YTHDC1	YTH domain containing 1	0.335292	2.35e-06	1.53e-05	protein_coding
ENSG00000083937.4	CHMP2B	charged multivesicular body protein 2B	-0.625751	1.26e-14	1.88e-13	protein_coding
ENSG00000084070.7	SMAP2	small ArfGAP2	-0.327243	0.00295569	0.0106837	protein_coding
ENSG00000084072.12	PPIE	peptidylprolyl isomerase E	0.10673	0.20844	0.373818	protein_coding
ENSG00000084073.4	ZMPSTE24	zinc metallopeptidase STE24	-0.24455	0.000475753	0.00206268	protein_coding
ENSG00000084090.9	STARD7	StAR related lipid transfer domain containing 7	0.0408994	0.507811	0.688281	protein_coding
ENSG00000084092.6	NOA1	nitric oxide associated 1	0.170174	0.0915952	0.196538	protein_coding
ENSG00000084093.11	REST	RE1 silencing transcription factor	-0.166726	0.0546533	0.129658	protein_coding
ENSG00000084110.6	HAL	histidine ammonia-lyase	-0.0123163	0.971269	0.985264	protein_coding
ENSG00000084112.10	SSH1	slingshot protein phosphatase 1	0.0142127	0.875029	0.936374	protein_coding
ENSG00000084207.11	GSTP1	glutathione S-transferase pi 1	0.00203257	0.97755	0.989157	protein_coding
ENSG00000084234.12	APLP2	amyloid beta precursor like protein 2	-0.433619	1.66e-10	1.77e-09	protein_coding
ENSG00000084444.9	KIAA1467	NA	-0.458908	0.000195428	0.000921565	protein_coding
ENSG00000084453.12	SLCO1A2	solute carrier organic anion transporter family member 1A2	-1.47265	1.53e-05	8.79e-05	protein_coding
ENSG00000084463.2	WBP11	WW domain binding protein 11	-0.266481	0.000697714	0.00292341	protein_coding
ENSG00000084623.7	EIF3I	eukaryotic translation initiation factor 3 subunit I	0.479558	3.79e-10	3.89e-09	protein_coding
ENSG00000084628.5	NKAIN1	Sodium/potassium transporting ATPase interacting 1	-0.378144	0.265077	0.444306	protein_coding
ENSG00000084636.12	COL16A1	collagen type XVI alpha 1 chain	-0.267012	0.000798994	0.00329699	protein_coding
ENSG00000084652.11	TXLNA	taxilin alpha	0.143692	0.113421	0.233206	protein_coding
ENSG00000084674.9	APOB	apolipoprotein B	2.74229	4.89e-32	1.79e-30	protein_coding
ENSG00000084676.11	NCOA1	nuclear receptor coactivator 1	-0.126553	0.231707	0.403753	protein_coding
ENSG00000084693.11	AGBL5	ATP/GTP binding protein like 5	-0.0220421	0.802032	0.896058	protein_coding
ENSG00000084710.9	EFR3B	EFR3 homolog B	-3.03895	4.76e-24	1.21e-22	protein_coding
ENSG00000084731.9	KIF3C	kinesin family member 3C	0.302889	0.00166275	0.00637248	protein_coding
ENSG00000084733.6	RAB10	RAB10, member RAS oncogene family	-0.00105349	0.986885	0.993654	protein_coding
ENSG00000084734.4	GCKR	glucokinase regulator	-0.0905348	0.793733	0.891158	protein_coding
ENSG00000084754.6	HADHA	hydroxyacyl-CoA dehydrogenase/3-ketoacyl-CoA thiolase/enoyl-CoA hydratase (trifunctional protein), alpha subunit	0.000796322	0.991186	0.995737	protein_coding
ENSG00000084764.6	MAPRE3	microtubule associated protein RP/EB family member 3	-0.756824	2.79e-18	5.16e-17	protein_coding
ENSG00000084774.9	CAD	carbamoyl-phosphate synthetase 2, aspartate transcarbamylase, and dihydroorotase	0.158199	0.0814721	0.179235	protein_coding
ENSG00000085063.10	CD59	CD59 molecule	-0.574706	2.04e-16	3.37e-15	protein_coding
ENSG00000085117.7	CD82	CD82 molecule	0.522802	9.64e-05	0.000481004	protein_coding
ENSG00000085185.10	BCORL1	BCL6 corepressor-like 1	0.0130447	0.914309	0.958195	protein_coding
ENSG00000085224.16	ATRX	ATRX, chromatin remodeler	-0.650677	1.79e-08	1.54e-07	protein_coding
ENSG00000085231.9	TAF9	TATA-box binding protein associated factor 9	0.169553	0.129736	0.25971	protein_coding
ENSG00000085265.6	FCN1	ficolin 1	NA	NA	NA	protein_coding
ENSG00000085274.11	MYNN	myoneurin	0.052852	0.595396	0.75765	protein_coding
ENSG00000085276.13	MECOM	MDS1 and EVI1 complex locus	1.15054	1.01e-15	1.59e-14	protein_coding
ENSG00000085365.13	SCAMP1	secretory carrier membrane protein 1	-0.640162	3.49e-21	7.56e-20	protein_coding
ENSG00000085377.9	PREP	prolyl endopeptidase	-0.247789	0.00111039	0.0044443	protein_coding
ENSG00000085382.7	HACE1	HECT domain and ankyrin repeat containing E3 ubiquitin protein ligase 1	-0.185688	0.022359	0.0617949	protein_coding
ENSG00000085415.11	SEH1L	SEH1 like nucleoporin	0.417545	2.89e-09	2.73e-08	protein_coding
ENSG00000085433.11	WDR47	WD repeat domain 47	-0.651637	3.02e-16	4.94e-15	protein_coding
ENSG00000085449.10	WDFY1	WD repeat and FYVE domain containing 1	0.221692	0.000549105	0.00235464	protein_coding
ENSG00000085465.11	OVGP1	oviductal glycoprotein 1	-0.542063	0.0999542	0.210877	protein_coding
ENSG00000085491.11	SLC25A24	solute carrier family 25 member 24	0.300123	1.58e-06	1.06e-05	protein_coding
ENSG00000085511.15	MAP3K4	mitogen-activated protein kinase kinase kinase 4	0.229463	0.00679078	0.0222392	protein_coding
ENSG00000085514.10	PILRA	paired immunoglobin like type 2 receptor alpha	0.0596425	0.838661	0.918036	protein_coding
ENSG00000085552.12	IGSF9	immunoglobulin superfamily member 9	0.38192	0.164814	0.312933	protein_coding
ENSG00000085563.10	ABCB1	ATP binding cassette subfamily B member 1	-3.52931	1.31e-36	5.78e-35	protein_coding
ENSG00000085644.9	ZNF213	zinc finger protein 213	-0.305284	0.022714	0.062573	protein_coding
ENSG00000085662.9	AKR1B1	aldo-keto reductase family 1 member B	0.566745	1.9e-14	2.79e-13	protein_coding
ENSG00000085719.7	CPNE3	copine 3	-0.116013	0.0804433	0.17749	protein_coding
ENSG00000085721.8	RRN3	RRN3 homolog, RNA polymerase I transcription factor	-0.456595	7.07e-09	6.43e-08	protein_coding
ENSG00000085733.11	CTTN	cortactin	-0.143037	0.0232326	0.0637326	protein_coding
ENSG00000085741.8	WNT11	Wnt family member 11	-1.04237	0.00267517	0.00977982	protein_coding
ENSG00000085760.10	MTIF2	mitochondrial translational initiation factor 2	0.274209	0.000563495	0.00240739	protein_coding
ENSG00000085788.9	DDHD2	DDHD domain containing 2	-0.0815452	0.252047	0.429561	protein_coding
ENSG00000085831.11	TTC39A	tetratricopeptide repeat domain 39A	-0.244035	0.469859	0.655626	protein_coding
ENSG00000085832.12	EPS15	epidermal growth factor receptor pathway substrate 15	-0.0619493	0.320753	0.507156	protein_coding
ENSG00000085840.7	ORC1	origin recognition complex subunit 1	0.88271	0.000834947	0.00342585	protein_coding
ENSG00000085871.4	MGST2	microsomal glutathione S-transferase 2	-0.964027	1.1e-15	1.73e-14	protein_coding
ENSG00000085872.10	CHERP	calcium homeostasis endoplasmic reticulum protein	-0.213542	0.0333783	0.0864427	protein_coding
ENSG00000085978.17	ATG16L1	autophagy related 16 like 1	-0.434358	5.63e-06	3.47e-05	protein_coding
ENSG00000085982.9	USP40	ubiquitin specific peptidase 40	0.0408071	0.542124	0.71633	protein_coding
ENSG00000085998.9	POMGNT1	protein O-linked mannose N-acetylglucosaminyltransferase 1 (beta 1,2-)	-0.76174	3.04e-28	9.37e-27	protein_coding
ENSG00000085999.7	RAD54L	RAD54-like (S. cerevisiae)	0.871896	0.00182853	0.00693588	protein_coding
ENSG00000086015.15	MAST2	microtubule associated serine/threonine kinase 2	-0.274401	0.000285869	0.0013047	protein_coding
ENSG00000086061.11	DNAJA1	DnaJ heat shock protein family (Hsp40) member A1	0.0707692	0.322615	0.509113	protein_coding
ENSG00000086062.8	B4GALT1	beta-1,4-galactosyltransferase 1	0.390708	3.67e-07	2.7e-06	protein_coding
ENSG00000086065.9	CHMP5	charged multivesicular body protein 5	-0.316327	0.0228752	0.0629551	protein_coding
ENSG00000086102.14	NFX1	nuclear transcription factor, X-box binding 1	-0.241101	0.00408098	0.0142159	protein_coding
ENSG00000086159.8	AQP6	aquaporin 6	NA	NA	NA	protein_coding
ENSG00000086189.5	DIMT1	DIM1 dimethyladenosine transferase 1 homolog	-0.445508	0.00183985	0.00697072	protein_coding
ENSG00000086200.12	IPO11	importin 11	-0.0768235	0.306589	0.491225	protein_coding
ENSG00000086205.12	FOLH1	folate hydrolase 1	NA	NA	NA	protein_coding
ENSG00000086232.8	EIF2AK1	eukaryotic translation initiation factor 2 alpha kinase 1	0.0347546	0.656189	0.8006	protein_coding
ENSG00000086288.7	NME8	NME/NM23 family member 8	NA	NA	NA	protein_coding
ENSG00000086289.7	EPDR1	ependymin related 1	-1.59803	1.51e-80	2.62e-78	protein_coding
ENSG00000086300.11	SNX10	sorting nexin 10	-0.103362	0.615175	NA	protein_coding
ENSG00000086475.10	SEPHS1	selenophosphate synthetase 1	0.274399	0.000248565	0.00114755	protein_coding
ENSG00000086504.11	MRPL28	mitochondrial ribosomal protein L28	0.508474	5.25e-05	0.000275796	protein_coding
ENSG00000086506.2	HBQ1	hemoglobin subunit theta 1	-0.100662	0.669484	NA	protein_coding
ENSG00000086544.2	ITPKC	inositol-trisphosphate 3-kinase C	-0.0601874	0.513201	0.692901	protein_coding
ENSG00000086548.8	CEACAM6	carcinoembryonic antigen related cell adhesion molecule 6	NA	NA	NA	protein_coding
ENSG00000086570.8	FAT2	FAT atypical cadherin 2	-0.363166	0.167653	0.317075	protein_coding
ENSG00000086589.7	RBM22	RNA binding motif protein 22	0.0324105	0.632963	0.784831	protein_coding
ENSG00000086598.6	TMED2	transmembrane p24 trafficking protein 2	-0.0897709	0.387271	0.577018	protein_coding
ENSG00000086619.9	ERO1LB	NA	0.126126	0.319819	0.506087	protein_coding
ENSG00000086666.14	ZFAND6	zinc finger AN1-type containing 6	0.126515	0.394917	0.583702	protein_coding
ENSG00000086696.5	HSD17B2	hydroxysteroid 17-beta dehydrogenase 2	-1.94731	1.75e-20	3.66e-19	protein_coding
ENSG00000086712.8	TXLNG	taxilin gamma	0.0794218	0.36338	0.552621	protein_coding
ENSG00000086717.13	PPEF1	protein phosphatase with EF-hand domain 1	0.0307672	0.79786	NA	protein_coding
ENSG00000086730.12	LAT2	linker for activation of T-cells family member 2	-0.049658	0.884701	0.941772	protein_coding
ENSG00000086758.11	HUWE1	HECT, UBA and WWE domain containing 1, E3 ubiquitin protein ligase	-0.226439	0.26728	0.446813	protein_coding
ENSG00000086827.4	ZW10	zw10 kinetochore protein	-0.0519583	0.600284	0.761495	protein_coding
ENSG00000086848.10	ALG9	ALG9, alpha-1,2-mannosyltransferase	0.0148324	0.960612	0.980121	protein_coding
ENSG00000086967.9	MYBPC2	myosin binding protein C, fast type	-0.136348	0.277744	NA	protein_coding
ENSG00000086991.8	NOX4	NADPH oxidase 4	-1.17949	5.63e-21	1.21e-19	protein_coding
ENSG00000087008.11	ACOX3	acyl-CoA oxidase 3, pristanoyl	-0.0831099	0.416748	0.606134	protein_coding
ENSG00000087053.14	MTMR2	myotubularin related protein 2	0.359921	1.41e-09	1.37e-08	protein_coding
ENSG00000087074.7	PPP1R15A	protein phosphatase 1 regulatory subunit 15A	-0.190165	0.0313418	0.0822786	protein_coding
ENSG00000087076.4	HSD17B14	hydroxysteroid 17-beta dehydrogenase 14	-1.31128	9.66e-18	1.73e-16	protein_coding
ENSG00000087077.7	TRIP6	thyroid hormone receptor interactor 6	0.276299	0.00183144	0.00694423	protein_coding
ENSG00000087085.9	ACHE	acetylcholinesterase (Cartwright blood group)	-0.705061	0.0514584	0.123576	protein_coding
ENSG00000087086.9	FTL	ferritin light chain	-0.685674	9.53e-32	3.44e-30	protein_coding
ENSG00000087087.14	SRRT	serrate, RNA effector molecule	0.221151	0.00909658	0.0285767	protein_coding
ENSG00000087088.15	BAX	BCL2 associated X, apoptosis regulator	0.300455	6.5e-05	0.000335581	protein_coding
ENSG00000087095.8	NLK	nemo like kinase	0.388484	2.67e-06	1.73e-05	protein_coding
ENSG00000087111.16	PIGS	phosphatidylinositol glycan anchor biosynthesis class S	-0.126562	0.141648	0.278042	protein_coding
ENSG00000087116.9	ADAMTS2	ADAM metallopeptidase with thrombospondin type 1 motif 2	-0.42658	5.49e-07	3.97e-06	protein_coding
ENSG00000087128.5	TMPRSS11E	transmembrane protease, serine 11E	NA	NA	NA	protein_coding
ENSG00000087152.11	ATXN7L3	ataxin 7 like 3	0.208894	0.0184037	0.0524167	protein_coding
ENSG00000087157.14	PGS1	phosphatidylglycerophosphate synthase 1	0.298719	0.00333025	0.0118603	protein_coding
ENSG00000087191.8	PSMC5	proteasome 26S subunit, ATPase 5	0.00787022	0.923209	0.962221	protein_coding
ENSG00000087206.12	UIMC1	ubiquitin interaction motif containing 1	0.304717	0.00014965	0.000722749	protein_coding
ENSG00000087237.6	CETP	cholesteryl ester transfer protein	-0.145609	0.609352	NA	protein_coding
ENSG00000087245.8	MMP2	matrix metallopeptidase 2	0.0821431	0.467507	0.653602	protein_coding
ENSG00000087250.4	MT3	metallothionein 3	-0.319865	0.280226	NA	protein_coding
ENSG00000087253.7	LPCAT2	lysophosphatidylcholine acyltransferase 2	-0.8263	8.97e-35	3.7e-33	protein_coding
ENSG00000087258.9	GNAO1	G protein subunit alpha o1	0.833586	1.6e-13	2.18e-12	protein_coding
ENSG00000087263.12	OGFOD1	2-oxoglutarate and iron dependent oxygenase domain containing 1	-0.274365	0.000454387	0.00197793	protein_coding
ENSG00000087266.11	SH3BP2	SH3 domain binding protein 2	0.35572	9.04e-05	0.000453929	protein_coding
ENSG00000087269.11	NOP14	NOP14 nucleolar protein	-0.104617	0.193508	0.3536	protein_coding
ENSG00000087274.12	ADD1	adducin 1	-0.216681	0.0197984	0.0557166	protein_coding
ENSG00000087299.7	L2HGDH	L-2-hydroxyglutarate dehydrogenase	-0.267225	0.0816962	0.179627	protein_coding
ENSG00000087301.4	TXNDC16	thioredoxin domain containing 16	-0.673188	8.46e-07	5.94e-06	protein_coding
ENSG00000087302.4	C14orf166	chromosome 14 open reading frame 166	0.149535	0.0261192	0.0703602	protein_coding
ENSG00000087303.12	NID2	nidogen 2	1.62567	2.07e-103	5.63e-101	protein_coding
ENSG00000087338.4	GMCL1	germ cell-less, spermatogenesis associated 1	0.0134971	0.884816	0.941804	protein_coding
ENSG00000087365.10	SF3B2	splicing factor 3b subunit 2	8.95e-05	0.999245	0.999705	protein_coding
ENSG00000087448.5	KLHL42	kelch like family member 42	0.0582102	0.443008	0.631846	protein_coding
ENSG00000087460.18	GNAS	GNAS complex locus	-0.217017	0.00272784	0.0099427	protein_coding
ENSG00000087470.13	DNM1L	dynamin 1 like	-0.0972681	0.11666	0.238482	protein_coding
ENSG00000087494.11	PTHLH	parathyroid hormone like hormone	-0.808424	0.0193464	0.0546724	protein_coding
ENSG00000087495.12	PHACTR3	phosphatase and actin regulator 3	0.17958	0.308225	NA	protein_coding
ENSG00000087502.13	ERGIC2	ERGIC and golgi 2	-0.535028	4.78e-11	5.33e-10	protein_coding
ENSG00000087510.5	TFAP2C	transcription factor AP-2 gamma	0.0904043	0.324222	0.510967	protein_coding
ENSG00000087586.13	AURKA	aurora kinase A	0.738931	3.59e-12	4.4e-11	protein_coding
ENSG00000087589.12	CASS4	Cas scaffolding protein family member 4	-0.409776	0.0825454	0.180986	protein_coding
ENSG00000087842.6	PIR	pirin	0.114442	0.3883	0.57761	protein_coding
ENSG00000087884.10	AAMDC	adipogenesis associated Mth938 domain containing	0.057673	0.663481	0.806101	protein_coding
ENSG00000087903.8	RFX2	regulatory factor X2	0.201159	0.123014	0.248902	protein_coding
ENSG00000087916.7	SLC6A14	solute carrier family 6 member 14	NA	NA	NA	protein_coding
ENSG00000087995.11	METTL2A	methyltransferase like 2A	-0.0571388	0.514253	0.693611	protein_coding
ENSG00000088002.7	SULT2B1	sulfotransferase family 2B member 1	-0.295975	0.413821	0.603041	protein_coding
ENSG00000088035.11	ALG6	ALG6, alpha-1,3-glucosyltransferase	-0.146513	0.357742	0.546544	protein_coding
ENSG00000088038.13	CNOT3	CCR4-NOT transcription complex subunit 3	0.187345	0.0257589	0.0695713	protein_coding
ENSG00000088053.7	GP6	glycoprotein VI platelet	-0.0440393	0.716352	NA	protein_coding
ENSG00000088179.4	PTPN4	protein tyrosine phosphatase, non-receptor type 4	-0.476764	7.62e-06	4.61e-05	protein_coding
ENSG00000088205.8	DDX18	DEAD-box helicase 18	0.176398	0.00450983	0.0155357	protein_coding
ENSG00000088247.11	KHSRP	KH-type splicing regulatory protein	0.281699	0.00203599	0.00765312	protein_coding
ENSG00000088256.4	GNA11	G protein subunit alpha 11	-0.0650151	0.509359	0.689568	protein_coding
ENSG00000088280.13	ASAP3	ArfGAP with SH3 domain, ankyrin repeat and PH domain 3	0.432818	4.46e-06	2.8e-05	protein_coding
ENSG00000088298.7	EDEM2	ER degradation enhancing alpha-mannosidase like protein 2	-0.50242	4.2e-08	3.48e-07	protein_coding
ENSG00000088305.14	DNMT3B	DNA methyltransferase 3 beta	0.993516	2.39e-06	1.56e-05	protein_coding
ENSG00000088320.3	REM1	RRAD and GEM like GTPase 1	-0.0997481	0.574735	NA	protein_coding
ENSG00000088325.11	TPX2	TPX2, microtubule nucleation factor	1.29177	7.29e-26	2e-24	protein_coding
ENSG00000088356.4	PDRG1	p53 and DNA damage regulated 1	-0.110053	0.252074	0.429571	protein_coding
ENSG00000088367.16	EPB41L1	erythrocyte membrane protein band 4.1 like 1	-0.356063	0.000218858	0.00102294	protein_coding
ENSG00000088386.11	SLC15A1	solute carrier family 15 member 1	NA	NA	NA	protein_coding
ENSG00000088387.13	DOCK9	dedicator of cytokinesis 9	-0.288823	0.0142315	0.0420949	protein_coding
ENSG00000088448.10	ANKRD10	ankyrin repeat domain 10	0.409153	0.111391	0.229945	protein_coding
ENSG00000088451.6	TGDS	TDP-glucose 4,6-dehydratase	-0.162398	0.391175	0.580189	protein_coding
ENSG00000088538.12	DOCK3	dedicator of cytokinesis 3	-0.340755	0.287267	0.469921	protein_coding
ENSG00000088543.10	C3orf18	chromosome 3 open reading frame 18	0.406693	0.0012035	0.00477113	protein_coding
ENSG00000088682.9	COQ9	coenzyme Q9	-0.100512	0.302102	0.486143	protein_coding
ENSG00000088726.11	TMEM40	transmembrane protein 40	0.208248	0.516337	0.695497	protein_coding
ENSG00000088727.8	KIF9	kinesin family member 9	-0.441559	0.0450323	0.110585	protein_coding
ENSG00000088756.8	ARHGAP28	Rho GTPase activating protein 28	1.83987	1.19e-77	1.91e-75	protein_coding
ENSG00000088766.6	CRLS1	cardiolipin synthase 1	0.402596	1.05e-05	6.21e-05	protein_coding
ENSG00000088782.4	DEFB127	defensin beta 127	NA	NA	NA	protein_coding
ENSG00000088808.12	PPP1R13B	protein phosphatase 1 regulatory subunit 13B	-0.138774	0.190535	0.349614	protein_coding
ENSG00000088812.13	ATRN	attractin	-0.387633	7.2e-05	0.000368337	protein_coding
ENSG00000088826.13	SMOX	spermine oxidase	0.406165	0.00505458	0.0171826	protein_coding
ENSG00000088827.8	SIGLEC1	sialic acid binding Ig like lectin 1	-0.0958995	0.704183	NA	protein_coding
ENSG00000088832.10	FKBP1A	FK506 binding protein 1A	0.247207	0.000138742	0.000673557	protein_coding
ENSG00000088833.12	NSFL1C	NSFL1 cofactor	-0.24145	0.00071019	0.0029706	protein_coding
ENSG00000088836.7	SLC4A11	solute carrier family 4 member 11	-0.497416	0.00730667	0.0237107	protein_coding
ENSG00000088854.11	C20orf194	chromosome 20 open reading frame 194	-0.391298	2.89e-07	2.16e-06	protein_coding
ENSG00000088876.7	ZNF343	zinc finger protein 343	0.244953	0.0178194	0.05099	protein_coding
ENSG00000088881.15	EBF4	early B-cell factor 4	0.601391	0.000871111	0.00356602	protein_coding
ENSG00000088882.7	CPXM1	carboxypeptidase X, M14 family member 1	2.82508	8.08e-17	1.37e-15	protein_coding
ENSG00000088888.13	MAVS	mitochondrial antiviral signaling protein	0.0843152	0.378098	0.567364	protein_coding
ENSG00000088899.10	LZTS3	leucine zipper tumor suppressor family member 3	-0.757844	4.24e-13	5.6e-12	protein_coding
ENSG00000088926.9	F11	coagulation factor XI	NA	NA	NA	protein_coding
ENSG00000088930.6	XRN2	5'-3' exoribonuclease 2	0.0822323	0.204459	0.368229	protein_coding
ENSG00000088986.6	DYNLL1	dynein light chain LC8-type 1	-0.213708	0.142404	0.279191	protein_coding
ENSG00000088992.13	TESC	tescalcin	0.0830599	0.634662	NA	protein_coding
ENSG00000089006.12	SNX5	sorting nexin 5	0.486602	5.43e-10	5.49e-09	protein_coding
ENSG00000089009.11	RPL6	ribosomal protein L6	0.409448	7.6e-14	1.07e-12	protein_coding
ENSG00000089012.10	SIRPG	signal regulatory protein gamma	0	1	NA	protein_coding
ENSG00000089022.9	MAPKAPK5	mitogen-activated protein kinase-activated protein kinase 5	-0.164534	0.0528807	0.126233	protein_coding
ENSG00000089041.12	P2RX7	purinergic receptor P2X 7	1.20242	0.000597538	0.00254174	protein_coding
ENSG00000089048.10	ESF1	ESF1 nucleolar pre-rRNA processing protein homolog	-0.201464	0.00515895	0.0174919	protein_coding
ENSG00000089050.10	RBBP9	RB binding protein 9, serine hydrolase	-0.296331	0.00098144	0.00397283	protein_coding
ENSG00000089053.8	ANAPC5	anaphase promoting complex subunit 5	-0.0896208	0.150145	0.29096	protein_coding
ENSG00000089057.10	SLC23A2	solute carrier family 23 member 2	-0.915659	8.17e-28	2.46e-26	protein_coding
ENSG00000089060.7	SLC24A6	NA	0.692315	3.58e-09	3.35e-08	protein_coding
ENSG00000089063.10	TMEM230	transmembrane protein 230	-0.231429	0.000505702	0.00218094	protein_coding
ENSG00000089091.11	DZANK1	double zinc ribbon and ankyrin repeat domains 1	-0.254945	0.235215	0.4085	protein_coding
ENSG00000089094.12	KDM2B	lysine demethylase 2B	0.269484	0.0263198	0.0708334	protein_coding
ENSG00000089101.13	C20orf26	NA	0.0346048	0.820498	NA	protein_coding
ENSG00000089116.3	LHX5	LIM homeobox 5	NA	NA	NA	protein_coding
ENSG00000089123.11	TASP1	taspase 1	-0.204927	0.0966775	0.205239	protein_coding
ENSG00000089127.8	OAS1	2'-5'-oligoadenylate synthetase 1	-1.14686	0.000114158	0.000562576	protein_coding
ENSG00000089154.6	GCN1L1	NA	0.063029	0.547213	0.720542	protein_coding
ENSG00000089157.11	RPLP0	ribosomal protein lateral stalk subunit P0	0.344426	1.12e-08	9.89e-08	protein_coding
ENSG00000089159.11	PXN	paxillin	-0.206085	0.0223966	0.06189	protein_coding
ENSG00000089163.4	SIRT4	sirtuin 4	-0.44646	0.110364	0.228305	protein_coding
ENSG00000089169.10	RPH3A	rabphilin 3A	NA	NA	NA	protein_coding
ENSG00000089177.13	KIF16B	kinesin family member 16B	0.0754661	0.486091	0.669923	protein_coding
ENSG00000089195.10	TRMT6	tRNA methyltransferase 6	-0.280043	0.0132771	0.0397096	protein_coding
ENSG00000089199.5	CHGB	chromogranin B	-0.0796657	0.811869	0.901954	protein_coding
ENSG00000089220.4	PEBP1	phosphatidylethanolamine binding protein 1	-0.554986	2.58e-21	5.64e-20	protein_coding
ENSG00000089225.15	TBX5	T-box 5	0.0982778	0.271586	0.451814	protein_coding
ENSG00000089234.11	BRAP	BRCA1 associated protein	-0.198247	0.0205381	0.057509	protein_coding
ENSG00000089248.6	ERP29	endoplasmic reticulum protein 29	0.0475391	0.605299	0.76495	protein_coding
ENSG00000089250.14	NOS1	nitric oxide synthase 1	-0.112921	0.326314	NA	protein_coding
ENSG00000089280.14	FUS	FUS RNA binding protein	0.581678	3.71e-05	0.000200417	protein_coding
ENSG00000089289.11	IGBP1	immunoglobulin (CD79A) binding protein 1	0.412285	2.15e-08	1.84e-07	protein_coding
ENSG00000089327.10	FXYD5	FXYD domain containing ion transport regulator 5	-0.164622	0.0633791	0.14656	protein_coding
ENSG00000089335.16	ZNF302	zinc finger protein 302	-0.191816	0.0942671	0.201388	protein_coding
ENSG00000089351.10	GRAMD1A	GRAM domain containing 1A	0.362115	0.0001841	0.000872981	protein_coding
ENSG00000089356.12	FXYD3	FXYD domain containing ion transport regulator 3	NA	NA	NA	protein_coding
ENSG00000089472.12	HEPH	hephaestin	-0.180245	0.147068	0.286356	protein_coding
ENSG00000089486.12	CDIP1	cell death inducing p53 target 1	-0.174998	0.0839464	0.18344	protein_coding
ENSG00000089505.13	CMTM1	CKLF like MARVEL transmembrane domain containing 1	-0.559952	0.0111614	0.0342234	protein_coding
ENSG00000089558.4	KCNH4	potassium voltage-gated channel subfamily H member 4	-0.545712	0.0737726	0.165608	protein_coding
ENSG00000089597.12	GANAB	glucosidase II alpha subunit	-0.0418573	0.575758	0.742846	protein_coding
ENSG00000089639.6	GMIP	GEM interacting protein	0.0864385	0.45882	0.645493	protein_coding
ENSG00000089682.12	RBM41	RNA binding motif protein 41	-0.0567707	0.572042	0.740196	protein_coding
ENSG00000089685.10	BIRC5	baculoviral IAP repeat containing 5	2.38963	7.47e-86	1.46e-83	protein_coding
ENSG00000089692.4	LAG3	lymphocyte activating 3	0.480756	0.185834	0.343127	protein_coding
ENSG00000089693.6	MLF2	myeloid leukemia factor 2	-0.035878	0.664579	0.806889	protein_coding
ENSG00000089723.5	OTUB2	OTU deubiquitinase, ubiquitin aldehyde binding 2	0.188065	0.297938	0.48148	protein_coding
ENSG00000089737.11	DDX24	DEAD-box helicase 24	-0.95932	2.25e-36	9.86e-35	protein_coding
ENSG00000089775.6	ZBTB25	zinc finger and BTB domain containing 25	0.112927	0.343175	0.53139	protein_coding
ENSG00000089818.12	NECAP1	NECAP endocytosis associated 1	-0.222156	0.00743854	0.0240959	protein_coding
ENSG00000089820.11	ARHGAP4	Rho GTPase activating protein 4	0.523417	0.0819958	0.180124	protein_coding
ENSG00000089847.8	ANKRD24	ankyrin repeat domain 24	-1.66382	4.96e-12	6.01e-11	protein_coding
ENSG00000089876.7	DHX32	DEAH-box helicase 32 (putative)	0.0111618	0.901779	0.950712	protein_coding
ENSG00000089902.8	RCOR1	REST corepressor 1	-0.140647	0.138987	0.274106	protein_coding
ENSG00000089916.13	GPATCH2L	G-patch domain containing 2 like	-0.208954	0.0180328	0.0515102	protein_coding
ENSG00000090006.13	LTBP4	latent transforming growth factor beta binding protein 4	0.764617	2.94e-16	4.82e-15	protein_coding
ENSG00000090013.5	BLVRB	biliverdin reductase B	0.529476	6.57e-07	4.69e-06	protein_coding
ENSG00000090020.6	SLC9A1	solute carrier family 9 member A1	-0.430669	2.11e-06	1.39e-05	protein_coding
ENSG00000090054.9	SPTLC1	serine palmitoyltransferase long chain base subunit 1	0.0136132	0.85023	0.923332	protein_coding
ENSG00000090060.13	PAPOLA	poly(A) polymerase alpha	0.171096	0.00431879	0.0149486	protein_coding
ENSG00000090061.13	CCNK	cyclin K	0.146923	0.0295819	0.0782458	protein_coding
ENSG00000090097.15	PCBP4	poly(rC) binding protein 4	-0.10513	0.191737	0.351294	protein_coding
ENSG00000090104.7	RGS1	regulator of G-protein signaling 1	NA	NA	NA	protein_coding
ENSG00000090238.7	YPEL3	yippee like 3	0.101559	0.307265	0.492066	protein_coding
ENSG00000090263.11	MRPS33	mitochondrial ribosomal protein S33	0.190688	0.27044	0.450374	protein_coding
ENSG00000090266.8	NDUFB2	NADH:ubiquinone oxidoreductase subunit B2	-0.0465052	0.588461	0.752002	protein_coding
ENSG00000090273.9	NUDC	nuclear distribution C, dynein complex regulator	0.20858	0.0325601	0.0847949	protein_coding
ENSG00000090316.11	MAEA	macrophage erythroblast attacher	-0.227632	0.0182237	0.0519949	protein_coding
ENSG00000090339.4	ICAM1	intercellular adhesion molecule 1	1.00981	2.76e-33	1.07e-31	protein_coding
ENSG00000090372.10	STRN4	striatin 4	0.0614689	0.526102	0.703722	protein_coding
ENSG00000090376.4	IRAK3	interleukin 1 receptor associated kinase 3	0.940171	3.66e-25	9.71e-24	protein_coding
ENSG00000090382.2	LYZ	lysozyme	-0.0187312	0.909689	NA	protein_coding
ENSG00000090402.3	SI	sucrase-isomaltase	-0.108825	0.335768	NA	protein_coding
ENSG00000090432.5	MUL1	mitochondrial E3 ubiquitin protein ligase 1	-0.298077	0.0056009	0.0187758	protein_coding
ENSG00000090447.7	TFAP4	transcription factor AP-4	1.1573	1.28e-13	1.76e-12	protein_coding
ENSG00000090470.10	PDCD7	programmed cell death 7	-0.0742426	0.446458	0.634733	protein_coding
ENSG00000090487.6	SPG21	spastic paraplegia 21 (autosomal recessive, Mast syndrome)	0.289751	0.000135542	0.000659983	protein_coding
ENSG00000090512.7	FETUB	fetuin B	-0.176931	0.213524	NA	protein_coding
ENSG00000090520.6	DNAJB11	DnaJ heat shock protein family (Hsp40) member B11	0.0877694	0.228324	0.39917	protein_coding
ENSG00000090530.5	LEPREL1	NA	0.182105	0.0274804	0.0734211	protein_coding
ENSG00000090534.13	THPO	thrombopoietin	1.12249	0.00199223	0.00749872	protein_coding
ENSG00000090539.11	CHRD	chordin	1.97889	3.49e-18	6.42e-17	protein_coding
ENSG00000090554.7	FLT3LG	fms related tyrosine kinase 3 ligand	0.0379857	0.851595	0.924225	protein_coding
ENSG00000090565.11	RAB11FIP3	RAB11 family interacting protein 3	-0.190652	0.0406513	0.101753	protein_coding
ENSG00000090581.5	GNPTG	N-acetylglucosamine-1-phosphate transferase gamma subunit	-1.10379	1.08e-33	4.25e-32	protein_coding
ENSG00000090612.16	ZNF268	zinc finger protein 268	-0.00399946	0.957204	0.97858	protein_coding
ENSG00000090615.8	GOLGA3	golgin A3	-0.117415	0.232355	0.404591	protein_coding
ENSG00000090621.9	PABPC4	poly(A) binding protein cytoplasmic 4	-0.159635	0.0213082	0.0593008	protein_coding
ENSG00000090659.13	CD209	CD209 molecule	NA	NA	NA	protein_coding
ENSG00000090661.7	CERS4	ceramide synthase 4	1.28257	2.12e-18	3.96e-17	protein_coding
ENSG00000090674.11	MCOLN1	mucolipin 1	-0.968141	2.61e-19	5.13e-18	protein_coding
ENSG00000090686.11	USP48	ubiquitin specific peptidase 48	0.0685986	0.306217	0.490949	protein_coding
ENSG00000090776.5	EFNB1	ephrin B1	0.219834	0.0783593	0.173911	protein_coding
ENSG00000090857.9	PDPR	pyruvate dehydrogenase phosphatase regulatory subunit	0.127043	0.107441	0.223006	protein_coding
ENSG00000090861.11	AARS	alanyl-tRNA synthetase	0.287904	0.00420972	0.0146176	protein_coding
ENSG00000090863.7	GLG1	golgi glycoprotein 1	-0.0518404	0.513409	0.69299	protein_coding
ENSG00000090889.10	KIF4A	kinesin family member 4A	2.13827	6.54e-36	2.82e-34	protein_coding
ENSG00000090905.13	TNRC6A	trinucleotide repeat containing 6A	0.097396	0.134589	0.267213	protein_coding
ENSG00000090920.9	FCGBP	Fc fragment of IgG binding protein	-1.39347	0.000109594	0.000541991	protein_coding
ENSG00000090924.10	PLEKHG2	pleckstrin homology and RhoGEF domain containing G2	0.252374	0.00231899	0.00860949	protein_coding
ENSG00000090932.6	DLL3	delta like canonical Notch ligand 3	0.583687	0.0713447	0.160997	protein_coding
ENSG00000090971.4	NAT14	N-acetyltransferase 14 (putative)	0.705785	2.91e-11	3.29e-10	protein_coding
ENSG00000090975.8	PITPNM2	phosphatidylinositol transfer protein membrane associated 2	0.978611	2.56e-11	2.91e-10	protein_coding
ENSG00000090989.13	EXOC1	exocyst complex component 1	-0.326323	1.97e-06	1.31e-05	protein_coding
ENSG00000091009.6	RBM27	RNA binding motif protein 27	0.0296208	0.722582	0.84595	protein_coding
ENSG00000091010.4	POU4F3	POU class 4 homeobox 3	-0.130385	0.491487	NA	protein_coding
ENSG00000091039.12	OSBPL8	oxysterol binding protein like 8	-0.281768	4.21e-05	0.000225031	protein_coding
ENSG00000091073.15	DTX2	deltex E3 ubiquitin ligase 2	0.167672	0.132071	0.263416	protein_coding
ENSG00000091106.14	NLRC4	NLR family CARD domain containing 4	NA	NA	NA	protein_coding
ENSG00000091127.9	PUS7	pseudouridylate synthase 7 (putative)	0.237706	0.00537266	0.0180974	protein_coding
ENSG00000091128.8	LAMB4	laminin subunit beta 4	-0.170431	0.566766	NA	protein_coding
ENSG00000091129.15	NRCAM	neuronal cell adhesion molecule	-0.224126	0.128009	0.256831	protein_coding
ENSG00000091136.9	LAMB1	laminin subunit beta 1	0.148814	0.0620037	0.143889	protein_coding
ENSG00000091137.7	SLC26A4	solute carrier family 26 member 4	0.392705	0.196319	0.357216	protein_coding
ENSG00000091138.8	SLC26A3	solute carrier family 26 member 3	-0.176931	0.213524	NA	protein_coding
ENSG00000091140.8	DLD	dihydrolipoamide dehydrogenase	0.0740525	0.226475	0.39668	protein_coding
ENSG00000091157.9	WDR7	WD repeat domain 7	-0.396381	3.16e-05	0.000172711	protein_coding
ENSG00000091164.8	TXNL1	thioredoxin like 1	-0.172042	0.0906756	0.1951	protein_coding
ENSG00000091181.15	IL5RA	interleukin 5 receptor subunit alpha	-0.00954155	0.953476	NA	protein_coding
ENSG00000091262.10	ABCC6	ATP binding cassette subfamily C member 6	-1.02654	1.78e-07	1.36e-06	protein_coding
ENSG00000091317.7	CMTM6	CKLF like MARVEL transmembrane domain containing 6	-0.0616517	0.337687	0.526366	protein_coding
ENSG00000091409.10	ITGA6	integrin subunit alpha 6	-0.74332	2.98e-19	5.81e-18	protein_coding
ENSG00000091428.13	RAPGEF4	Rap guanine nucleotide exchange factor 4	-0.459228	0.041493	0.103529	protein_coding
ENSG00000091436.12	MLTK	NA	0.501186	5.12e-11	5.68e-10	protein_coding
ENSG00000091482.5	SMPX	small muscle protein, X-linked	-0.089968	0.607376	NA	protein_coding
ENSG00000091483.6	FH	fumarate hydratase	0.027647	0.664693	0.806977	protein_coding
ENSG00000091490.6	SEL1L3	SEL1L family member 3	0.851031	1.03e-28	3.22e-27	protein_coding
ENSG00000091513.10	TF	transferrin	-0.769379	0.0224055	0.0619059	protein_coding
ENSG00000091527.11	CDV3	CDV3 homolog	0.282989	6.18e-05	0.000319972	protein_coding
ENSG00000091536.12	MYO15A	myosin XVA	0.161775	0.590036	0.753572	protein_coding
ENSG00000091542.8	ALKBH5	alkB homolog 5, RNA demethylase	-0.142904	0.153354	0.295569	protein_coding
ENSG00000091583.6	APOH	apolipoprotein H	0.111602	0.333519	NA	protein_coding
ENSG00000091592.11	NLRP1	NLR family pyrin domain containing 1	-0.722701	1.32e-29	4.29e-28	protein_coding
ENSG00000091622.11	ACKR6	NA	-1.39433	2.04e-17	3.6e-16	protein_coding
ENSG00000091640.3	SPAG7	sperm associated antigen 7	-0.0732986	0.428947	0.618341	protein_coding
ENSG00000091651.4	ORC6	origin recognition complex subunit 6	0.277708	0.198991	0.360744	protein_coding
ENSG00000091656.11	ZFHX4	zinc finger homeobox 4	-0.013267	0.931624	0.965289	protein_coding
ENSG00000091664.7	SLC17A6	solute carrier family 17 member 6	-0.112921	0.326314	NA	protein_coding
ENSG00000091704.5	CPA1	carboxypeptidase A1	0	1	NA	protein_coding
ENSG00000091732.11	ZC3HC1	zinc finger C3HC-type containing 1	0.0882674	0.409312	0.598072	protein_coding
ENSG00000091831.16	ESR1	estrogen receptor 1	-1.19042	0.000336453	0.00151091	protein_coding
ENSG00000091844.3	RGS17	regulator of G-protein signaling 17	1.07858	0.00301296	0.0108546	protein_coding
ENSG00000091879.9	ANGPT2	angiopoietin 2	0	1	NA	protein_coding
ENSG00000091947.5	TMEM101	transmembrane protein 101	0.260688	0.0496392	0.119869	protein_coding
ENSG00000091972.14	CD200	CD200 molecule	0.742206	0.031632	0.082907	protein_coding
ENSG00000091986.11	CCDC80	coiled-coil domain containing 80	0.368751	5.98e-05	0.000310634	protein_coding
ENSG00000092009.6	CMA1	chymase 1	NA	NA	NA	protein_coding
ENSG00000092010.10	PSME1	proteasome activator subunit 1	0.597838	4.83e-11	5.38e-10	protein_coding
ENSG00000092020.6	PPP2R3C	protein phosphatase 2 regulatory subunit B''gamma	-0.0387492	0.775334	0.879985	protein_coding
ENSG00000092036.12	HAUS4	HAUS augmin like complex subunit 4	0.304905	0.0381983	0.0966256	protein_coding
ENSG00000092051.12	JPH4	junctophilin 4	0.137409	0.278401	NA	protein_coding
ENSG00000092054.12	MYH7	myosin heavy chain 7	-0.244381	0.20066	NA	protein_coding
ENSG00000092067.5	CEBPE	CCAAT/enhancer binding protein epsilon	NA	NA	NA	protein_coding
ENSG00000092068.14	SLC7A8	solute carrier family 7 member 8	0.621282	1.13e-05	6.61e-05	protein_coding
ENSG00000092094.6	OSGEP	O-sialoglycoprotein endopeptidase	0.00423901	0.982213	0.991375	protein_coding
ENSG00000092096.10	SLC22A17	solute carrier family 22 member 17	0.268471	0.0184733	0.0525921	protein_coding
ENSG00000092098.12	RNF31	ring finger protein 31	0.00115058	0.991006	0.995737	protein_coding
ENSG00000092108.16	SCFD1	sec1 family domain containing 1	0.0945587	0.19634	0.357221	protein_coding
ENSG00000092140.10	G2E3	G2/M-phase specific E3 ubiquitin protein ligase	0.161493	0.0799988	0.176728	protein_coding
ENSG00000092148.8	HECTD1	HECT domain E3 ubiquitin protein ligase 1	-0.285081	0.0187443	0.053209	protein_coding
ENSG00000092199.13	HNRNPC	heterogeneous nuclear ribonucleoprotein C (C1/C2)	-0.0920312	0.155071	0.298029	protein_coding
ENSG00000092200.8	RPGRIP1	retinitis pigmentosa GTPase regulator interacting protein 1	-0.108825	0.335768	NA	protein_coding
ENSG00000092201.5	SUPT16H	SPT16 homolog, facilitates chromatin remodeling subunit	-0.0251451	0.758732	0.869457	protein_coding
ENSG00000092203.9	TOX4	TOX high mobility group box family member 4	-0.00315271	0.970831	0.985182	protein_coding
ENSG00000092208.12	GEMIN2	gem nuclear organelle associated protein 2	0.15193	0.540371	0.715107	protein_coding
ENSG00000092295.7	TGM1	transglutaminase 1	-0.876623	8.59e-05	0.00043346	protein_coding
ENSG00000092330.11	TINF2	TERF1 interacting nuclear factor 2	0.0936815	0.209626	0.375292	protein_coding
ENSG00000092345.9	DAZL	deleted in azoospermia like	0.0742318	0.579893	NA	protein_coding
ENSG00000092377.9	TBL1Y	transducin beta like 1, Y-linked	NA	NA	NA	protein_coding
ENSG00000092421.12	SEMA6A	semaphorin 6A	-2.51549	2.7e-93	6.21e-91	protein_coding
ENSG00000092439.9	TRPM7	transient receptor potential cation channel subfamily M member 7	-0.121006	0.0710175	0.16049	protein_coding
ENSG00000092445.7	TYRO3	TYRO3 protein tyrosine kinase	0.00779701	0.94666	0.973657	protein_coding
ENSG00000092470.7	WDR76	WD repeat domain 76	0.761208	3.66e-08	3.05e-07	protein_coding
ENSG00000092529.18	CAPN3	calpain 3	-0.27986	0.439021	0.627667	protein_coding
ENSG00000092531.5	SNAP23	synaptosome associated protein 23	0.280379	0.00327483	0.011682	protein_coding
ENSG00000092607.9	TBX15	T-box 15	0.407538	3.72e-07	2.73e-06	protein_coding
ENSG00000092621.7	PHGDH	phosphoglycerate dehydrogenase	1.17858	4.49e-28	1.37e-26	protein_coding
ENSG00000092758.11	COL9A3	collagen type IX alpha 3 chain	0.799392	0.0264492	0.0710634	protein_coding
ENSG00000092820.13	EZR	ezrin	0.593134	1.59e-13	2.18e-12	protein_coding
ENSG00000092841.14	MYL6	myosin light chain 6	0.328757	6.07e-05	0.000314478	protein_coding
ENSG00000092847.6	AGO1	argonaute 1, RISC catalytic component	0.101445	0.303474	0.487557	protein_coding
ENSG00000092850.7	TEKT2	tektin 2	0.0635162	0.825945	NA	protein_coding
ENSG00000092853.9	CLSPN	claspin	1.15614	5.94e-14	8.43e-13	protein_coding
ENSG00000092871.12	RFFL	ring finger and FYVE like domain containing E3 ubiquitin protein ligase	0.215903	0.022315	0.0617069	protein_coding
ENSG00000092929.7	UNC13D	unc-13 homolog D	0.243139	0.489229	0.672356	protein_coding
ENSG00000092931.7	MFSD11	major facilitator superfamily domain containing 11	-0.774264	2.87e-19	5.62e-18	protein_coding
ENSG00000092964.12	DPYSL2	dihydropyrimidinase like 2	0.367066	2.23e-05	0.00012517	protein_coding
ENSG00000092969.7	TGFB2	transforming growth factor beta 2	-1.41778	3.19e-55	2.62e-53	protein_coding
ENSG00000092978.6	GPATCH2	G-patch domain containing 2	-0.126094	0.15242	0.294174	protein_coding
ENSG00000093000.13	NUP50	nucleoporin 50	-0.0386192	0.540384	0.715107	protein_coding
ENSG00000093009.5	CDC45	cell division cycle 45	1.64313	2.82e-13	3.77e-12	protein_coding
ENSG00000093010.7	COMT	catechol-O-methyltransferase	-0.216348	0.015262	0.0446772	protein_coding
ENSG00000093072.11	CECR1	cat eye syndrome chromosome region, candidate 1	1.76	8.38e-38	3.8e-36	protein_coding
ENSG00000093134.9	VNN3	vanin 3	-0.108825	0.335768	NA	protein_coding
ENSG00000093144.14	ECHDC1	ethylmalonyl-CoA decarboxylase 1	0.0752457	0.254339	0.431926	protein_coding
ENSG00000093167.13	LRRFIP2	LRR binding FLII interacting protein 2	-0.492337	1.51e-14	2.23e-13	protein_coding
[truncated: 18,319 more rows]
